# Supplementary material for: Metal-free C–H methylation and acetylation of heteroarenes with PEG-400
Source: Royal Society of Chemistry journal article supplement (doi:10.1039/d0gc01183e), 2020-01-01

# Supporting Information

For

## Metal-free C-H methylation and acetylation of Heteroarenes with PEG-400.

Vishal Suresh Kudale,<sup>a</sup> and Jeh-Jeng Wang<sup>\*,a,b</sup>

<sup>a</sup> Department of Medicinal and Applied Chemistry, Kaohsiung Medical University, No. 100, Shih-Chuan 1<sup>st</sup> Rd, Sanmin district, Kaohsiung City, 807 (Taiwan).

<sup>b</sup> Department of Medical Research, Kaohsiung Medical University Hospital, No. 100, Tzyou 1<sup>st</sup> Rd, Sanmin District, Kaohsiung City, 807 (Taiwan).

*E-mail:* [jjwang@kmu.edu.tw](mailto:jjwang@kmu.edu.tw).

## Table of Contents

|                                             |          |
|---------------------------------------------|----------|
| 1) General Information                      | S3       |
| 2) Mechanistic studies                      | S3-S5    |
| 3) Experimental Procedures                  | S5-S7    |
| 4) Spectral Characterization                | S7-S17   |
| 5) X-ray Analysis                           | S18-S21  |
| 6) References                               | S22- S22 |
| 7) Copies of $^1\text{H}$ & $^{13}\text{C}$ | S23-S68  |

## (1) General Information

$^1\text{H}$ ,  $^{13}\text{C}$  and DEPT NMR spectra were recorded on a 400 MHz Varian Unity Plus or Varian Mercury plus spectrometer. The chemical shift ( $\delta$ ) values are reported in parts per million (ppm), and the coupling constants ( $J$ ) are given in Hz. The spectra were recorded using  $\text{CDCl}_3$  as a solvent.  $^1\text{H}$  NMR chemical shifts are referenced to tetramethylsilane (TMS) (0 ppm).  $^{13}\text{C}$  NMR was referenced to  $\text{CDCl}_3$  (77.0 ppm) or  $\text{DMSO-d}_6$  (39.51 ppm). The abbreviations used are as follows: s, singlet; d, doublet; t, triplet; q, quartet; dd, doublet of doublet; ddd, doublet of doublet of doublet; dt, doublet of triplets; td, triplet of doublet; m, multiplet. Mass spectra and high resolution mass spectra (HRMS) were measured using the ESI (FT-MS solarix) at National Sun Yat-Sen University, Kaohsiung, Taiwan. Melting points were determined on an EZ-Melt (Automated melting point apparatus). All products reported showed  $^1\text{H}$  NMR spectra in agreement with the assigned structures. Reaction progress and product mixtures were routinely monitored by TLC using Merck TLC aluminum sheets (silica gel 60 F254). Column chromatography was carried out with 230–400 mesh silica gel 60 (Merck) and a mixture of hexane/ethyl acetate or hexane as an eluent. Preparative TLC was run on a Merck TLC aluminum sheets (silica gel 60 F254).

## (2) Mechanistic studies:

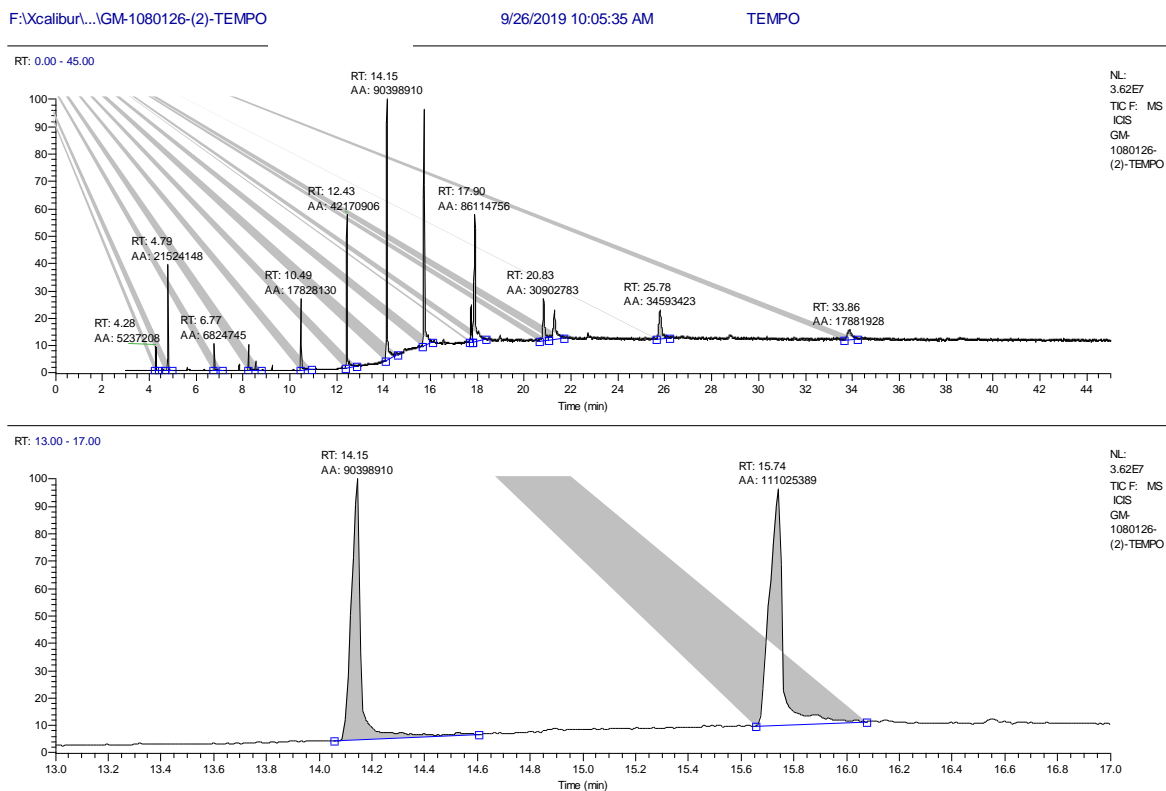

**Fig S1:** GC-MS with different retention time generated from PEG-400 in presence of oxidant & radical scavenger.

GM-1080126-(2)-TEMPO #908-911 RT: 12.41-12.4

L: 5.38E6

T: + c Full ms [ 40.00-700.00]

Exact Mass: 44.02621

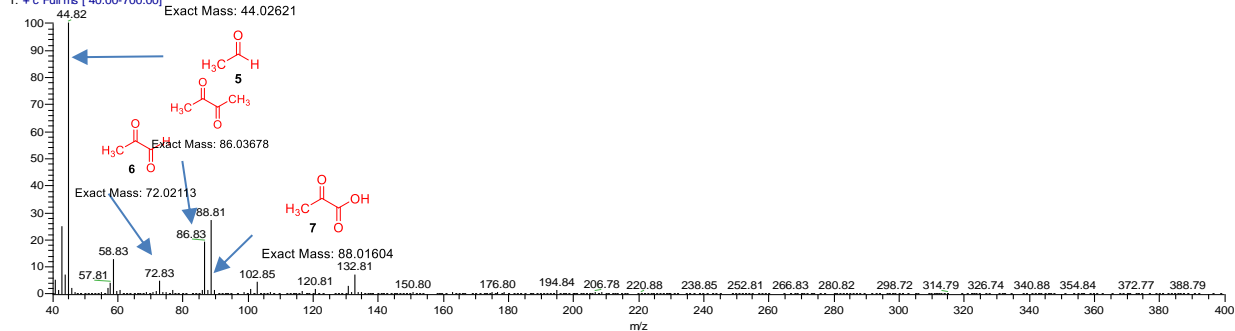

GM-1080126-(2)-TEMPO #1073-1077 RT: 14.12-14.16 AV: 5 SB: 11 14.20-14.30 NL: 8.18E6

T: + c Full ms [ 40.00-700.00]

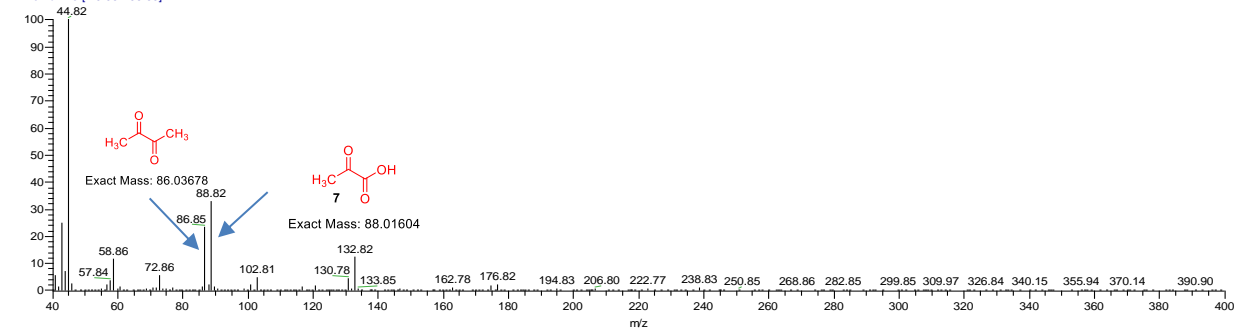

GM-1080126-(2)-TEMPO #1229-1234 RT: 15.70-16

I: 90 NL: 7.28E6

T: + c Full ms [ 40.00-700.00]

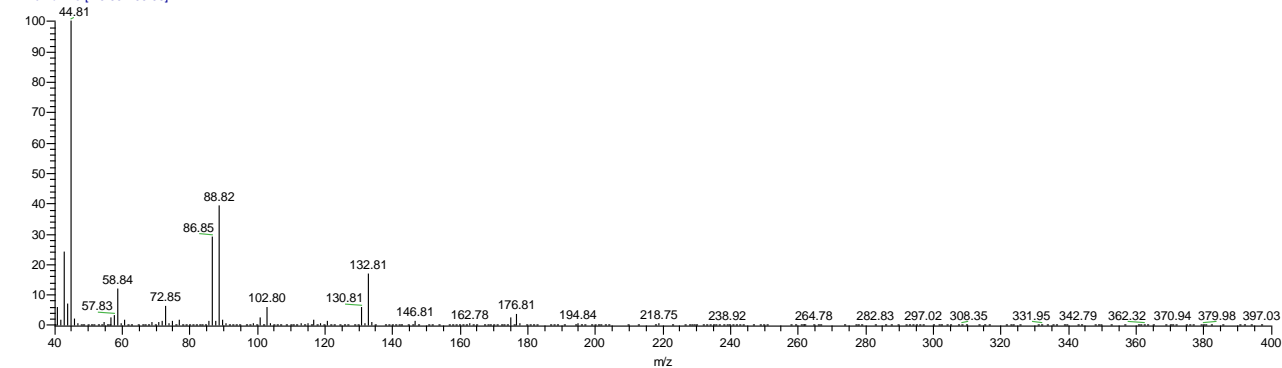

GM-1080126-(2)-TEMPO #1443-1449 RT: 17.86-17.92 AV: 7 SB: 11 18.00-18.10 NL: 3.65E6

T: + c Full ms [ 40.00-700.00]

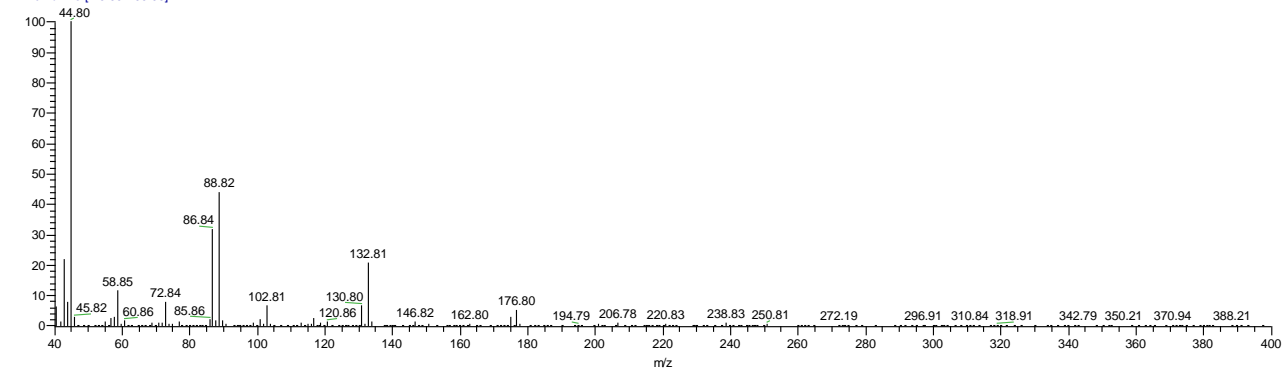**Fig S2:** GC-MS observed fragments acetaldehyde, 2-oxopropanal, 2-oxopropanoic acid from PEG-400.

## Scheme S1 Control Experiments:

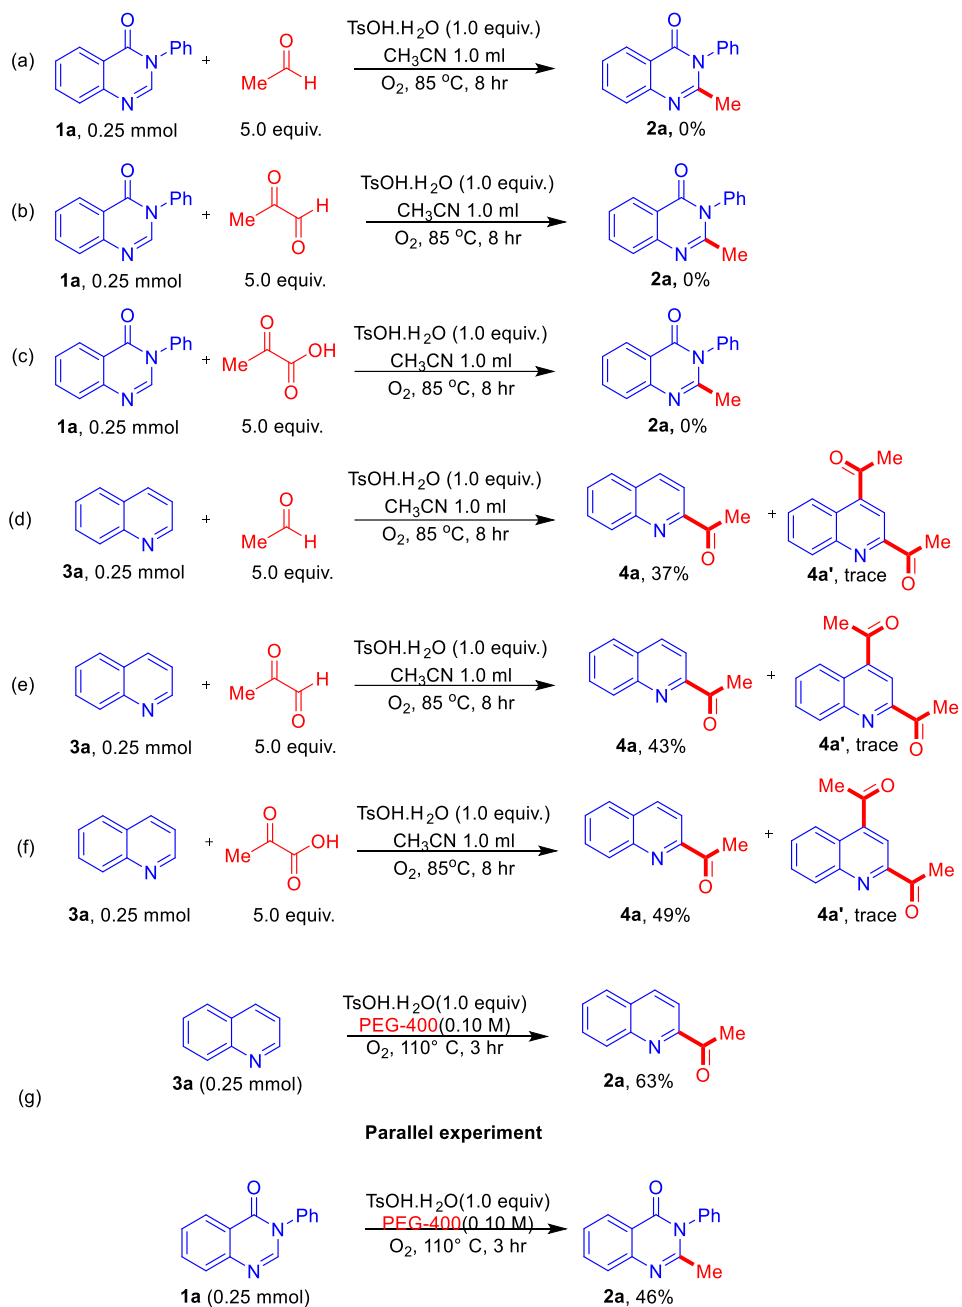

S

## (3) Experimental Procedures

### (i) General Experimental Procedure for the synthesis of quinazolinone.<sup>1</sup>

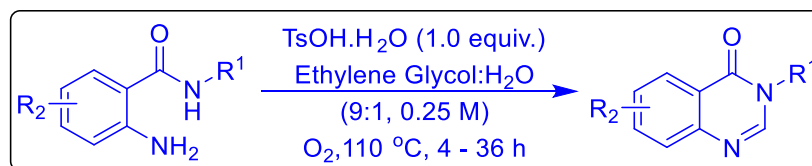

To an oven dried sealed tube was charged with **1a'-y'** (0.5 mmol), ethylene glycol (EG): H<sub>2</sub>O (9:1) (0.25 M) and TsOH. H<sub>2</sub>O (0.5 mmol) and allowed to stir at 110° C until the completion of reaction (4 ~ 36 h) by TLC. After completion, the reaction mixture was cooled to room temperature and diluted with 20 mL of water. The water layer was extracted with (3X20 mL) of ethyl acetate and the combined ethyl acetate layer was given brine wash (1X20 mL). The final ethyl acetate layer was dried over sodium sulfate and concentrated under reduced pressure to get the crude compound. The obtained crude was purified using column chromatography by eluting from hexane to 20% ethyl acetate/hexane to afford pure quinazolin-4(3*H*)-ones **1a-1y** in 75%-90% yields.

**(ii) General Experimental Procedure (B) and Spectral Characterization for the Synthesis of 2-methyl-3-phenylquinazolin-4(3*H*)-one with PEG-400 as “-CH<sub>3</sub>-” Source**

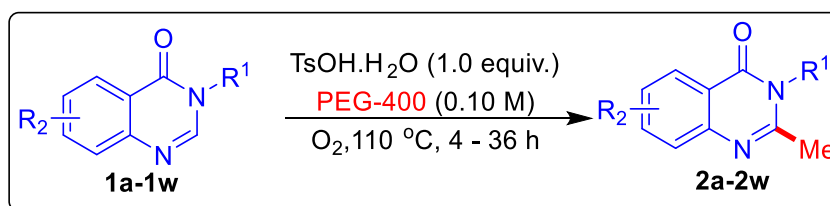

To an oven dried sealed tube was charged with **1a-1w** (0.25 mmol), PEG-400 (0.10 M) and TsOH. H<sub>2</sub>O (0.25 mmol) and allowed to stir at 110° C until the completion of reaction (4 ~ 36 h) by TLC. After completion, the reaction mixture was cooled to room temperature and diluted with 10 mL of water. The water layer was extracted with (3X20 mL) of ethyl acetate and the combined ethyl acetate layer was given brine wash (1X20 mL). The final ethyl acetate layer was dried over sodium sulfate and concentrated under reduced pressure to get the crude compound. The obtained crude was purified using column chromatography by eluting from hexane to 15-25% ethyl acetate/hexane to afford pure 2-methyl-3-arylquinazolin-4(3*H*)-one **2a-2w** in 66%-82% yields.

**(iii) General Experimental Procedure (A) and Spectral Characterization for the Synthesis of 2-methyl-3-phenylquinazolin-4(3*H*)-one with PEG-400 as “-CH- & -CH<sub>3</sub>-” Source**

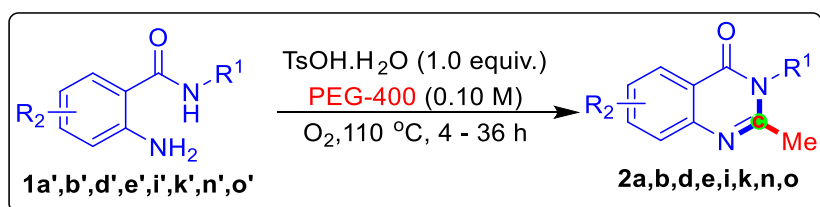

To an oven dried sealed tube was charged with **1a',b',d',e',i',k',n',o'** (0.25 mmol), PEG-400 (0.10 M) and TsOH. H<sub>2</sub>O (0.15 mmol) and allowed to stir at 110° C until the completion of reaction (4 ~ 36 h) by TLC.

After completion, the reaction mixture was cooled to room temperature and diluted with 10 mL of water. The water layer was extracted with (3X20 mL) of ethyl acetate and the combined ethyl acetate layer was given brine wash (1X20 mL). The final ethyl acetate layer was dried over sodium sulfate and concentrated under reduced pressure to get the crude compound. The obtained crude was purified using column chromatography by eluting from hexane to 15-25% ethyl acetate/hexane to afford pure 2-methyl-3-arylquinazolin-4(3*H*)-one **2a,b,d,e,i,k,n,o** in 67%-81% yields.

#### (iv) General Experimental Procedure (C) and Spectral Characterization for the Synthesis of heteroaryl acetylation with PEG-400 as “CH<sub>3</sub>CO” Source

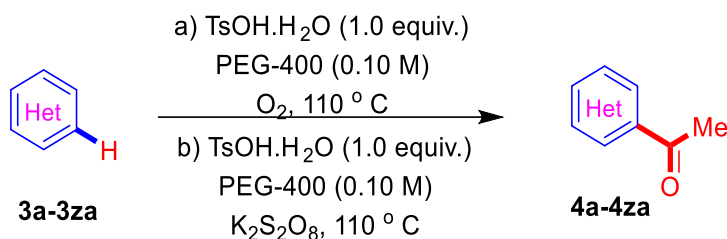

To an oven dried sealed tube was charged with **3a-3za** (0.25 mmol), PEG-400 (0.10 M) and TsOH. H<sub>2</sub>O (0.25 mmol) and allowed to stir at 110° C until the completion of reaction (4 ~ 24 h) by TLC. After completion, the reaction mixture was cooled to room temperature and diluted with 5.0 mL of water. The water layer was extracted with (3X10 mL) of ethyl acetate and the combined ethyl acetate layer was given brine wash (1X10 mL). The final ethyl acetate layer was dried over sodium sulfate and concentrated under reduced pressure to get the crude compound. The obtained crude was purified using column chromatography by eluting from hexane to 10- 20% ethyl acetate/hexane to afford pure heteroaryl acetylation **4a-4za** in 48%-85% yields

#### (4) Spectral Characterization

**2-methyl-3-phenylquinazolin-4(3*H*)-one (2a):**<sup>2</sup> The title compound was prepared according to the general

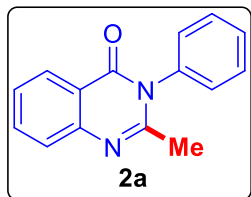

procedure B on a 0.25 mmol scale to obtain as a white solid (46 mg, yield = 80%); Mp.144-146 °C; <sup>1</sup>H NMR (CDCl<sub>3</sub>, 400 MHz) δ 8.27 (ddd, *J* = 8.0, 1.6, 0.4 Hz, 1H), 7.79-7.75 (m, 1H), 7.69 (dd, *J* = 8.4, 0.8, 1H), 7.58-7.54 (m, 2H), 7.53-7.51 (m, 1H), 7.47 (ddd, *J* = 9.2, 2.0, 0.8 Hz, 1H), 7.28-7.26 (m, 2H), 2.25 (s, 3H); <sup>13</sup>C NMR (CDCl<sub>3</sub>, 100 MHz) δ 162.22, 154.16, 147.41, 137.70, 134.54, 129.95, 129.24, 127.97, 127.00, 126.71, 126.59, 120.72, 77.31, 76.99, 76.67, 24.35.

**2-methyl-3-(*o*-tolyl)quinazolin-4(3*H*)-one (2b):**<sup>2</sup> The title compound was prepared according to the general

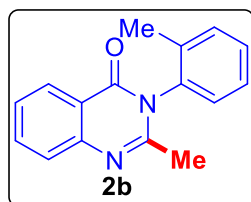

procedure B on a 0.25 mmol scale to obtain as a white solid (44 mg, yield = 71 %); Mp.

117-119 °C; <sup>1</sup>H NMR (CDCl<sub>3</sub>, 400 MHz) δ 8.29 (dd, *J* = 8.0, 1.2 Hz, 1H), 7.78 (ddd, *J* = 8.4, 7.2, 1.6 Hz, 1H), 7.70 (d, *J* = 8.8, 1H), 7.50 - 7.46 (m, 1H), 7.42-7.36 (m, 3H), 7.17 (d, 7.2 Hz, 1H), 2.19 (s, 3H), 2.13 (s, 3H); <sup>13</sup>C NMR (CDCl<sub>3</sub>, 100 MHz) δ 161.63, 154.30, 147.61, 136.76, 135.32, 134.57, 131.51, 129.56, 127.88, 127.62, 127.09, 126.74, 126.57, 120.70, 23.85, 17.37.

**2-methyl-3-(*m*-tolyl)quinazolin-4(3*H*)-one (2c):**<sup>3</sup> The title compound was prepared according to the general

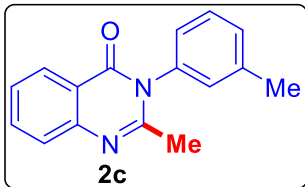

procedure B on a 0.25 mmol scale to obtain as a white solid (41 mg, yield = 66 %); Mp. 126-128 °C; <sup>1</sup>H NMR (CDCl<sub>3</sub>, 400 MHz) δ 8.27 (ddd, *J* = 8.0, 1.6, 0.4 Hz, 1H), 7.78-7.74 (m, 1H), 7.68 (ddd, *J* = 8.0, 1.2, 0.4, 1H), 7.48-7.41 (m, 2H), 7.32-7.29 (m, 1H), 7.08-7.04 (m, 2H), 2.42 (s, 3H), 2.25 (s, 3H); <sup>13</sup>C NMR (CDCl<sub>3</sub>, 100

MHz) δ 162.28, 154.29, 147.43, 140.11, 137.60, 134.49, 130.05, 129.73, 128.42, 127.01, 126.68, 126.54, 124.87, 120.74, 24.31, 21.31.

**3-(2,4-dimethylphenyl)-2-methylquinazolin-4(3*H*)-one (2d):**<sup>4</sup> The title compound was prepared according

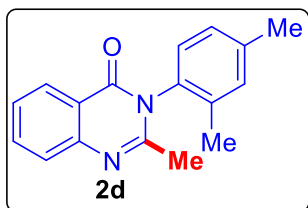

to the general procedure B on a 0.25 mmol scale to obtain as a white solid (48 mg, yield = 73 %); Mp. 133-135 °C; <sup>1</sup>H NMR (CDCl<sub>3</sub>, 400 MHz) δ 8.29 (ddd, *J* = 8.0, 1.6, 0.4 Hz 1H), 7.79-7.75 (m, 1H), 7.69 (dd, *J* = 7.6, 0.8 Hz 1H), 7.47 (ddd, *J* = 8.0, 3.2, 1.2 Hz, 1H), 7.18 (ddd, *J* = 7.6, 1.2, 0.4 Hz, 2H), 7.03 (d, *J* = 8.0 Hz 1H),

2.40 (s, 3H), 2.19 (s, 3H), 2.08 (s, 3H); <sup>13</sup>C NMR (CDCl<sub>3</sub>, 100 MHz) δ 161.76, 154.62, 147.58, 139.52, 134.83, 134.51, 134.09, 132.22, 128.30, 127.54, 127.12, 126.68, 126.51, 120.71, 77.31, 76.99, 76.68, 23.84, 21.16, 17.29.

**3-(2-ethylphenyl)-2-methylquinazolin-4(3*H*)-one (2e):**<sup>5</sup> The title compound was prepared according to the

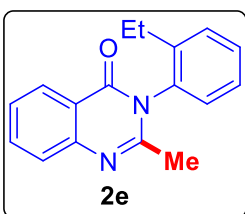

general procedure B on a 0.25 mmol scale to obtain as a white solid (45 mg, yield = 69 %); Mp. 88-90 °C; <sup>1</sup>H NMR (CDCl<sub>3</sub>, 400 MHz) δ 8.29 (ddd, *J* = 8.0, 1.2, 0.4 Hz, 1H), 7.80-7.76 (m, 1H), 7.71-7.68 (m, 1H), 7.49-7.45 (m, 3H), 7.40-7.35 (m, 1H), 7.15-7.13 (m, 1H), 2.46-2.39 (m, 2H), 2.19 (s, 3H), 1.18 (t, *J* = 7.6, 3H); <sup>13</sup>C NMR (CDCl<sub>3</sub>, 100

MHz) δ 161.89, 154.50, 147.59, 140.69, 136.18, 134.54, 129.72, 129.46, 128.00, 127.46, 127.11, 126.73, 126.56, 120.71, 77.31, 76.99, 76.67, 24.01, 23.56, 13.59.

**3-(4-ethylphenyl)-2-methylquinazolin-4(3*H*)-one (2f):**<sup>6</sup> The title compound was prepared according to the

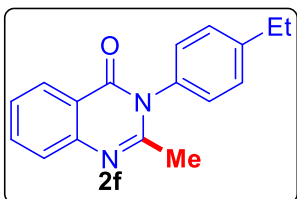

general procedure B on a 0.25 mmol scale to obtain as a white solid (45 mg, yield = 68 %); Mp. 145-147 °C; <sup>1</sup>H NMR (CDCl<sub>3</sub>, 400 MHz) δ 8.27 (ddd, *J* = 8.0, 1.6, 0.4 Hz, 1H), 7.78-7.73 (m, 1H), 7.67 (dd, *J* = 8.4, 0.8, 1H), 7.46 (ddd, *J* = 8.4, 7.2, 1.2, 1H), 7.39-7.35 (m, 2H), 7.18-7.15 (m, 2H), 2.75 (q, *J* = 8.4, 2H), 2.25 (s, 3H), 1.30



(t,  $J = 8.4$ , 3H);  $^{13}\text{C}$  NMR ( $\text{CDCl}_3$ , 100 MHz)  $\delta$  162.33, 154.50, 147.41, 145.40, 135.15, 134.46, 129.37, 127.66, 127.03, 126.66, 126.51, 120, 28.51, 24.37, 15.23.

**3-(2-methoxyphenyl)-2-methylquinazolin-4(3H)-one (2g):**<sup>3</sup> The title compound was prepared according to

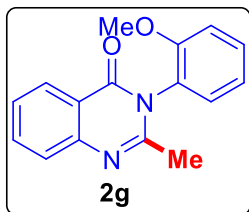

the general procedure B on a 0.25 mmol scale to obtain as a white solid (47 mg, yield = 70 %); Mp. 126-128 °C;  $^1\text{H}$  NMR ( $\text{CDCl}_3$ , 400 MHz)  $\delta$  8.28 (ddd,  $J = 8.0$ , 1.6, 0.4 Hz 1H), 7.76 (ddd,  $J = 8.0$ , 6.8, 1.2 Hz 1H), 7.68 (ddd,  $J = 8.4$ , 1.2, 0.8 Hz 1H), 7.50-7.43(m, 2H), 7.21(dd,  $J = 7.6$ , 1.6 Hz 1H), 7.11 (ddd,  $J = 8.8$ , 7.6, 1.2 Hz 2H), 3.79 (s, 3H), 2.22 (s, 3H);  $^{13}\text{C}$  NMR ( $\text{CDCl}_3$ , 100 MHz)  $\delta$  161.92, 154.98, 154.50, 147.59, 134.37, 130.82, 129.23, 127.05, 126.60, 126.32, 126.12, 121.32, 120.78, 112.17, 55.69, 23.45.

**3-(3-methoxyphenyl)-2-methylquinazolin-4(3H)-one (2h):**<sup>7</sup> The title compound was prepared according to

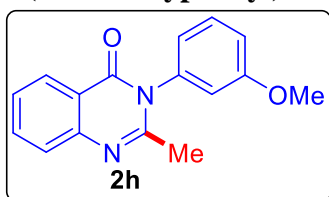

the general procedure B on a 0.25 mmol scale to obtain as a white solid (48 mg, yield = 71 %); Mp. 152-154 °C;  $^1\text{H}$  NMR ( $\text{CDCl}_3$ , 400 MHz)  $\delta$  8.28 (dd,  $J = 8.0$ , 1.2 Hz 1H), 7.77 (ddd,  $J = 8.4$ , 7.2, 1.6 Hz 1H), 7.68 (dd,  $J = 8.0$ , 0.4 Hz 1H), 7.48-7.43(m, 2H), 7.05(ddd,  $J = 8.4$ , 2.4, 0.8 Hz 1H), 6.86 (ddd,  $J = 7.6$ , 1.6, 0.8 Hz 1H), 6.80 (t,  $J = 2.0$  Hz 1H), 3.84 (s, 3H), 2.28 (s, 3H);  $^{13}\text{C}$  NMR ( $\text{CDCl}_3$ , 100 MHz)  $\delta$  162.16, 160.78, 154.19, 147.42, 138.74, 134.57, 130.68, 127.03, 126.72, 126.61, 120.74, 120.09, 115.04, 113.70, , 55.47, 24.14.

**3-(4-methoxyphenyl)-2-methylquinazolin-4(3H)-one (2i):**<sup>2</sup> The title compound was prepared according to

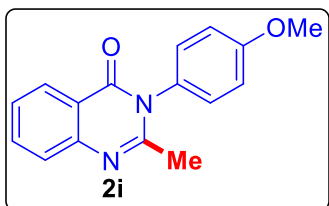

the general procedure B on a 0.25 mmol scale to obtain as a white solid (49 mg, yield = 73 %); Mp. 167-169 °C;  $^1\text{H}$  NMR ( $\text{CDCl}_3$ , 400 MHz)  $\delta$  8.27 (ddd,  $J = 8.0$ , 1.2, 0.4 Hz, 1H), 7.78-7.75 (m, 1H), 7.67 (dd,  $J = 8.4$ , 0.8, 1H), 7.46 (ddd,  $J = 8.0$ , 7.2, 1.2, 1H), 7.18-7.15 (m, 2H), 7.07-7.04 (m, 2H), 3.87 (s, 3H), 2.26 (s, 3H);  $^{13}\text{C}$  NMR ( $\text{CDCl}_3$ , 100 MHz)  $\delta$  162.49, 159.90, 154.75, 147.39, 134.49, 130.20, 128.94, 127.04, 126.67, 126.54, 120.73, 115.17, 55.51, 24.37.

**3-(4-fluorophenyl)-2-methylquinazolin-4(3H)-one (2j):**<sup>2</sup> The title compound was prepared according to the

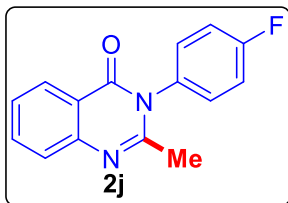

general procedure B on a 0.25 mmol scale to obtain as a white solid (39 mg, yield = 62 %); Mp. 132-134°C;  $^1\text{H}$  NMR ( $\text{CDCl}_3$ , 400 MHz)  $\delta$  8.26 (ddd,  $J = 8.0$ , 1.6, 0.4 Hz, 1H), 7.79-7.75 (m, 1H), 7.68-7.63 (m, 1H), 7.47 (ddd,  $J = 8.4$ , 7.2, 1.2, 1H), 7.26 (d,  $J = 0.8$ , 2H), 7.24 (s, 2H), 2.24 (s, 3H);  $^{13}\text{C}$  NMR ( $\text{CDCl}_3$ , 100 MHz)  $\delta$  13C NMR (101 MHz,  $\text{cdCl}_3$ )  $\delta$  163.95, 161.47(d,  $J_F = 280$  Hz), 153.97, 147.36, 145.80, 134.70, 129.90 (d,  $J_F = 22.9$  Hz), 129.82, 127.02, 126.81, 126.76 (d,  $J_F = 9$  Hz), 120.62, 117.18 (d,  $J_F = 5.5$  Hz), 116.95, 24.39.

**3-(2-chlorophenyl)-2-methylquinazolin-4(3H)-one (2k):**<sup>2</sup> The title compound was prepared according to the

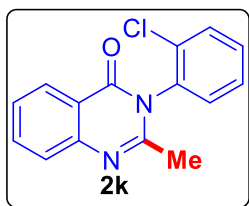

general procedure B on a 0.25 mmol scale to obtain as a white solid (50 mg, yield = 74 %); Mp. 124-126 °C; <sup>1</sup>H NMR (CDCl<sub>3</sub>, 400 MHz) δ 8.29-8.27 (m, 1H), 7.79 (ddd, *J* = 8.8, 7.2, 1.6 Hz, 1H), 7.70 (d, *J* = 8.0 Hz, 1H), 7.63-7.61 (m, 1H), 7.50-7.45 (m, 3H), 7.36 -7.33 (m, 1H), 2.23 (s, 3H). <sup>13</sup>C NMR (CDCl<sub>3</sub>, 100 MHz) δ 161.45, 153.66, 147.49, 135.41, 134.73, 132.55, 130.78, 130.73, 129.81, 128.35, 127.11, 126.85, 126.70, 120.54, 23.51.

**3-(3-chlorophenyl)-2-methylquinazolin-4(3H)-one (2l):**<sup>2</sup> The title compound was prepared according to the

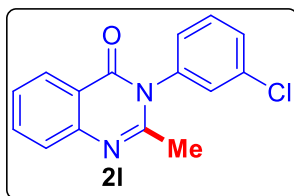

general procedure B on a 0.25 mmol scale to obtain as a white solid (46 mg, yield = 68 %); Mp. 129-131 °C; <sup>1</sup>H NMR (CDCl<sub>3</sub>, 400 MHz) δ 8.27 (dd, *J* = 8.0, 1.6 Hz, 1H), 7.79 (ddd, *J* = 8.4, 7.2, 1.6 Hz, 1H), 7.69 (d, *J* = 8.0 Hz, 1H), 7.51-7.46 (m, 3H), 7.31 (s, 1H), 7.20 -7.17 (m, 1H), 2.27 (s, 3H). <sup>13</sup>C NMR (CDCl<sub>3</sub>, 100 MHz) δ 162.07, 153.51, 147.35, 138.79, 135.61, 134.79, 130.93, 129.70, 128.55, 127.04, 126.87, 126.85, 126.47, 120.59, 24.33.

**3-(4-chlorophenyl)-2-methylquinazolin-4(3H)-one (2m):**<sup>2</sup> The title compound was prepared according to

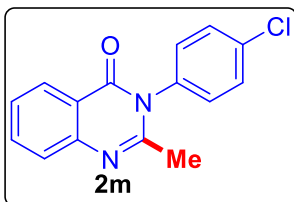

the general procedure B on a 0.25 mmol scale to obtain as a white solid (51 mg, yield = 76 %); Mp. 153-155 °C; <sup>1</sup>H NMR (CDCl<sub>3</sub>, 400 MHz) δ 8.26 (ddd, *J* = 8.0, 1.6, 0.4 Hz, 1H), 7.80-7.75 (m, 1H), 7.68 (dd, *J* = 8.4, 0.8, 1H), 7.55-7.52 (m, 2H), 7.48 (ddd, *J* = 8.0, 7.2, 1.2, 1H), 7.23-7.22 (m, 1H), 7.21-7.20 (m, 1H), 2.25 (s, 3H); <sup>13</sup>C NMR (CDCl<sub>3</sub>, 100 MHz) δ 162.14, 153.66, 147.34, 136.15, 135.38, 134.74, 130.27, 129.45, 127.02, 126.83, 126.79, 120.56, 24.36.

**3-(2-bromophenyl)-2-methylquinazolin-4(3H)-one (2n):**<sup>8</sup> The title compound was prepared according to

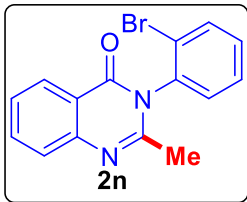

the general procedure B on a 0.25 mmol scale to obtain as a white solid (53 mg, yield = 67 %); Mp. 149-151 °C; <sup>1</sup>H NMR (CDCl<sub>3</sub>, 400 MHz) δ 8.29 (ddd, *J* = 8.0, 1.6, 0.8 Hz, 1H), 7.79 (ddd, *J* = 8.4, 2.0, 0.8 Hz, 2H), 7.70 (m, ddd, *J* = 7.6, 1.2, 0.8 Hz, 1H), 7.54-7.46 (m, 2H), 7.42-7.34 (m, 2H), 2.22(s, 3H); <sup>13</sup>C NMR (CDCl<sub>3</sub>, 100 MHz) δ 161.42, 153.60, 147.50, 137.10, 134.76, 133.95, 130.92, 129.82, 129.08, 127.16, 126.88, 126.72, 122.87, 120.61, 23.70.

**3-(4-bromophenyl)-2-methylquinazolin-4(3H)-one (2o):**<sup>2</sup> The title compound was prepared according to the

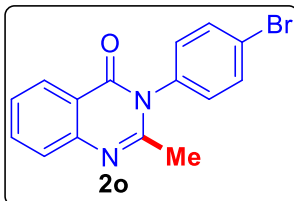

general procedure B on a 0.25 mmol scale to obtain as a white solid (59 mg, yield = 75 %); Mp. 166-168 °C; <sup>1</sup>H NMR (CDCl<sub>3</sub>, 400 MHz) δ 8.26 (ddd, *J* = 8.0, 1.6, 0.4 Hz 1H), 7.78 (ddd, *J* = 8.0, 6.8, 1.6 Hz 1H), 7.71-7.67 (m, 3H), 7.48 (ddd, *J* =

8.4, 7.2, 1.2 Hz 1H), 7.17-7.14 (m, 2H), 2.25(s, 3H); <sup>13</sup>C NMR (CDCl<sub>3</sub>, 100 MHz) δ 162.09, 153.58, 147.32, 136.68, 134.76, 133.26, 129.76, 127.02, 126.81, 123.45, 120.54, 77.31, 76.99, 76.67, 24.36.

**2-methyl-3-(4-(trifluoromethyl)phenyl)quinazolin-4(3H)-one (2q):**<sup>9</sup> The title compound was prepared

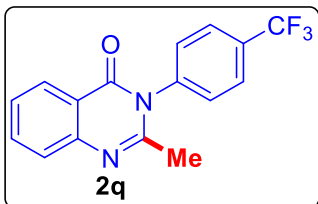

according to the general procedure B on a 0.25 mmol scale to obtain as a white solid (55 mg, yield = 72 %); Mp. 147-149 °C; <sup>1</sup>H NMR (CDCl<sub>3</sub>, 400 MHz) δ 8.26 (ddd, *J* = 8.0, 1.6, 0.4 Hz, 1H), 7.85-7.83 (m, 2H), 7.79 (ddd, *J* = 8.4, 7.2, 1.6, 1H), 7.69 (ddd, *J* = 8.4, 1.2, 0.4, 1H), 7.49 (ddd, *J* = 8.0, 7.2, 1.2, 1H), 7.44-7.42 (m, 2H), 2.24 (s, 3H); <sup>13</sup>C NMR (CDCl<sub>3</sub>, 100 MHz) δ 162.02, 153.10, 147.32, 140.90, 134.87, 131.76, 131.43, 128.86, 127.24 (q, *J<sub>F</sub>* = 3.6 Hz), 127.20, 127.17, 127.13, 127.01, 126.93, 126.91, 124.89, 122.18, 120.50, 24.37.

**2-methylquinazolin-4(3H)-one (2r):**<sup>8</sup> The title compound was prepared according to the general procedure B

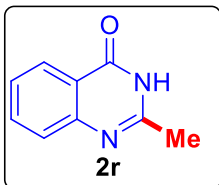

on a 0.25 mmol scale to obtain as a white solid (30 mg, yield = 75%); Mp. 230-232 °C; <sup>1</sup>H NMR (CDCl<sub>3</sub>, 400 MHz) δ 12.15 (*bs*, 1H), 8.31-8.28 (m, 1H), 7.78 (ddd, *J* = 8.4, 2.8, 1.2 Hz 1H), 7.71-7.68 (m, 1H), 7.49 (ddd, *J* = 8.0, 6.8, 0.8 Hz 1H), 2.62(s, 3H); <sup>13</sup>C NMR (CDCl<sub>3</sub>, 100 MHz) δ 164.31, 153.35, 149.34, 134.89, 126.94, 126.40, 126.17, 120.19, 77.31, 76.99, 76.68, 22.03.

**2,8-dimethyl-3-phenylquinazolin-4(3H)-one (2t):** The title compound was prepared according to the general

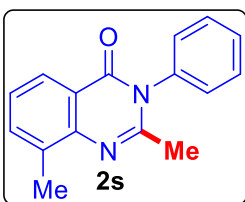

procedure B on a 0.25 mmol scale to obtain as a white solid (52 mg, yield = 83 %); Mp. 146-148 °C; <sup>1</sup>H NMR (CDCl<sub>3</sub>, 400 MHz) δ 8.12 (ddd, *J* = 8.0, 1.6, 0.8 Hz, 1H), 7.61 (ddd, *J* = 7.6, 1.6, 0.8 Hz, 1H), 7.57-7.53 (m, 2H), 7.51-7.49 (m, 1H), 7.34 (t, *J* = 7.6, 1H), 7.27-7.24 (m, 2H), 2.63 (s, 3H), 2.25 (s, 3H); <sup>13</sup>C NMR (CDCl<sub>3</sub>, 100 MHz) δ 162.72, 152.71, 146.07, 137.99, 135.33, 135.10, 129.93, 129.13, 128.02, 126.08, 124.67, 120.72, 24.61, 17.33. HRMS (ESI) calcd for C<sub>16</sub>H<sub>14</sub>N<sub>2</sub>O [M+H]<sup>+</sup>: 250.1106; found: 250.1109.

**7-chloro-2-methyl-3-phenylquinazolin-4(3H)-one (2u):**<sup>10</sup> The title compound was prepared according to the

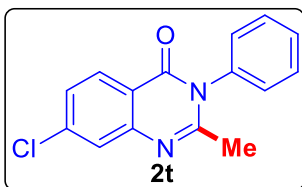

general procedure B on a 0.25 mmol scale to obtain as a white solid (46 mg, yield = 68 %); Mp. 173-175 °C; <sup>1</sup>H NMR (CDCl<sub>3</sub>, 400 MHz) δ 8.27 (ddd, *J* = 8.0, 1.2, 0.4 Hz 1H), 7.80-7.76 (m, 1H), 7.69 (dd, *J* = 7.6, 0.8 Hz 1H), 7.51-7.50 (m, 2H), 7.48-7.46 (m, 1H), 7.31 (td, *J* = 2.8, 1.2 Hz, 1H), 7.20-7.17 (m, 1H), 2.27 (s, 3H); <sup>13</sup>C NMR (CDCl<sub>3</sub>, 100 MHz) δ 162.04, 153.48, 147.32, 138.76, 135.57, 134.77, 130.91, 129.67, 128.53, 127.01, 126.85, 126.82, 126.45, 120.56, 24.31.

**6-bromo-2-methyl-3-phenylquinazolin-4(3H)-one (2v):**<sup>9</sup> The title compound was prepared according to the

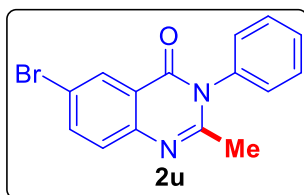

general procedure B on a 0.25 mmol scale to obtain as a white solid (60 mg, yield = 76 %); Mp. 178-180 °C; <sup>1</sup>H NMR (CDCl<sub>3</sub>, 400 MHz) δ 8.25 (ddd, *J* = 8.0, 1.2, 0.4 Hz 1H), 7.79-7.74 (m, 1H), 7.70-7.65 (m, 3H), 7.47 (ddd, *J* = 8.0, 3.2, 1.2 Hz 1H), 7.19-7.14 (m, 2 H), 2.24 (s, 3H); <sup>13</sup>C NMR (CDCl<sub>3</sub>, 100 MHz) δ 162.06, 153.54, 147.31, 136.67, 134.73, 133.24, 129.75, 126.99, 126.80, 126.78, 123.42, 120.53, 24.35.

**2-methyl-3,6-diphenylquinazolin-4(3H)-one (2w):** The title compound was prepared according to the

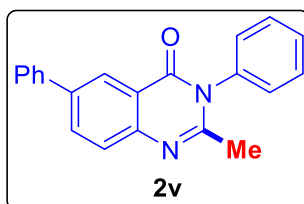

general procedure B on a 0.25 mmol scale to obtain as a white solid (61 mg, yield = 79 %); Mp. 173-175 °C; <sup>1</sup>H NMR (CDCl<sub>3</sub>, 400 MHz) δ 8.49 (d, *J* = 2.4 Hz, 1H), 8.02 (dd, *J* = 8.4, 2.0 Hz, 1H), 7.75 (d, *J* = 8.4, 1H), 7.70-7.67 (m, 2H), 7.59-7.45 (m, 5H), 7.40-7.35 (m, 1H), 7.30-7.27 (m, 2H), 2.26 (s, 3H); <sup>13</sup>C NMR (CDCl<sub>3</sub>,

100 MHz) δ 162.30, 154.12, 146.64, 139.59, 139.52, 137.74, 133.48, 129.99, 129.29, 128.93, 128.00, 127.76, 127.27, 127.13, 124.88, 120.98, 24.40. HRMS (ESI) calcd for C<sub>21</sub>H<sub>16</sub>N<sub>2</sub>O [M+H]<sup>+</sup>: 312.1263; found: 312.1257.

**1-(quinolin-2-yl)ethan-1-one (4a):**<sup>11</sup> The title compound was prepared according to the general procedure C

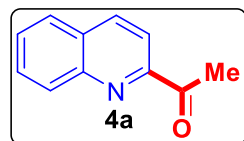

on a 0.25 mmol scale to obtain as a white solid (28 mg, yield = 66 %) Mp. 51-53 °C; <sup>1</sup>H NMR (CDCl<sub>3</sub>, 400 MHz) δ 8.26 (d, *J* = 8.8 Hz, 1H), 8.20 (d, *J* = 8.8 Hz, 1H), 8.13 (d, *J* = 8.8 Hz, 1H), 7.87 (d, *J* = 8.0 Hz, 1H), 7.80-7.76 (m, 1H), 7.66-6.4- (m, 1H), 2.87 (s, 3H); <sup>13</sup>C NMR (CDCl<sub>3</sub>, 100 MHz) δ 200.64, 153.20, 147.20, 136.82, 130.53, 129.94, 129.54, 128.51, 127.60, 117.92, 25.53.

**1-(4-methylquinolin-2-yl)ethan-1-one (4b):**<sup>11</sup> The title compound was prepared according to the general

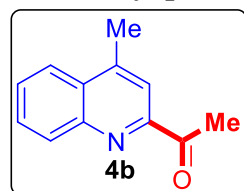

procedure C on a 0.15 mmol scale to obtain as a white solid (30 mg, yield = 65 %) Mp. 66-68 °C; <sup>1</sup>H NMR (CDCl<sub>3</sub>, 400 MHz) δ 8.19 (ddd, *J* = 8.4, 0.8, 0.4 Hz, 1H), 8.03(ddd, *J* = 8.0, 0.8, 0.4 Hz, 1H), 7.96 (d, *J* = 1.2 Hz, 1H), 7.76 (ddd, *J* = 8.4, 6.8, 1.6 Hz, 1H), 7.66 (ddd, *J* = 8.4, 6.8, 1.2 Hz, 1H), 2.85 (s, 3H), 2.75 (d, *J* = 0.8 Hz, 3H); <sup>13</sup>C NMR (CDCl<sub>3</sub>, 100 MHz) δ 201.03, 152.81, 147.07, 145.24, 131.13, 129.55, 128.25, 123.74, 118.43, 25.47, 18.84.

**1-(6-bromoquinolin-2-yl)ethan-1-one (4c):**<sup>12</sup> The title compound was prepared according to the general

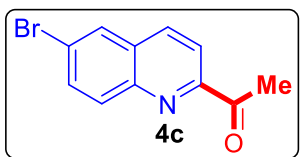

procedure C on a 0.15 mmol scale to obtain as a white solid (38 mg, yield = 60%) Mp. 62-64 °C; <sup>1</sup>H NMR (CDCl<sub>3</sub>, 400 MHz) δ 8.18 (dd, *J* = 8.4, 0.4 Hz, 1H), 8.14 (d, *J* = 8.8 Hz, 1H), 8.08-8.05 (m, 1H), 7.05 (d, *J* = 2.4 Hz, 1H), 7.85 (dd, *J* = 9.2, 2.4

Hz, 1H), 2.85 (s, 3H);  $^{13}\text{C}$  NMR ( $\text{CDCl}_3$ , 100 MHz)  $\delta$  200.20, 153.41, 145.76, 135.85, 133.57, 132.14, 130.52, 129.73, 122.81, 118.84, 25.49.

**1-(4-phenylquinolin-2-yl)ethan-1-one (4d):**<sup>17</sup> The title compound was prepared according to the general

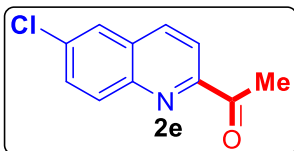

procedure C on a 0.15 mmol scale to obtain as a white solid (31 mg, yield = 61 %) Mp. 68-70 °C;  $^1\text{H}$  NMR ( $\text{CDCl}_3$ , 400 MHz)  $\delta$  8.18-8.12 (m, 3H), 7.85 (d,  $J$  = 2.4 Hz, 1H), 7.71 (dd,  $J$  = 8.8, 2.0 Hz, 1H), 2.85 (s, 3H);  $^{13}\text{C}$  NMR ( $\text{CDCl}_3$ , 100 MHz)  $\delta$  200.16, 153.30, 145.53, 135.91, 134.47, 132.07, 131.00, 130.05, 126.32, 118.83, 25.48.

**1-(4-phenylquinolin-2-yl)ethan-1-one (4e):**<sup>11</sup> The title compound was prepared according to the general

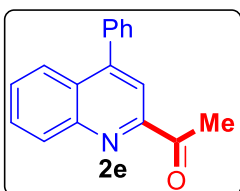

procedure C on a 0.15 mmol scale to obtain as a white solid (36 mg, yield = 58 %) Mp. 58-60 °C;  $^1\text{H}$  NMR ( $\text{CDCl}_3$ , 400 MHz)  $\delta$  8.27 (dd,  $J$  = 8.8, 0.8 Hz, 1H), 8.08 (s, 1H), 7.98 (dd,  $J$  = 8.4, 0.8 Hz, 1H), 7.78 (ddd,  $J$  = 8.4, 6.8, 0.4 Hz, 1H), 7.59 (ddd,  $J$  = 8.4, 6.8, 1.2 Hz, 1H), 7.53-7.49 (m, 5H), 2.90 (s, 3H);  $^{13}\text{C}$  NMR ( $\text{CDCl}_3$ , 100 MHz)  $\delta$  200.79, 152.69, 149.34, 147.81, 137.70, 130.92, 129.74, 129.52, 128.58, 128.57, 128.54, 128.01, 125.80, 118.12, 25.57.

**1-(6-methyl-4-(p-tolyl)quinolin-2-yl)ethan-1-one (4f):** The title compound was prepared according to the

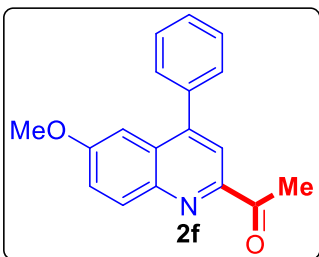

general procedure C on a 0.15 mmol scale to obtain as a white solid (40 mg, yield = 59 %) Mp. 176-178 °C;  $^1\text{H}$  NMR ( $\text{CDCl}_3$ , 400 MHz)  $\delta$  8.17 (d,  $J$  = 9.2 Hz, 1H), 8.04 (s, 1H), 7.54-7.49 (m, 5H), 7.44 (dd,  $J$  = 8.2, 2.8 Hz, 1H), 7.24 (d,  $J$  = 2.8 Hz, 1H), 3.81 (s, 3H), 2.87 (s, 3H);  $^{13}\text{C}$  NMR ( $\text{CDCl}_3$ , 100 MHz)  $\delta$  200.65, 159.60, 150.78, 147.69, 143.80, 138.08, 132.47, 129.43, 129.31, 128.72, 128.53, 122.50, 118.72, 103.57, 55.54, 25.52. HRMS (ESI) calcd for  $\text{C}_8\text{H}_6\text{ON}_2$   $[\text{M}+\text{H}]^+$ : 277.1702 found: 277.1105.

**1-(6-methyl-4-(p-tolyl)quinolin-2-yl)ethan-1-one (4g):** The title compound was prepared according to the

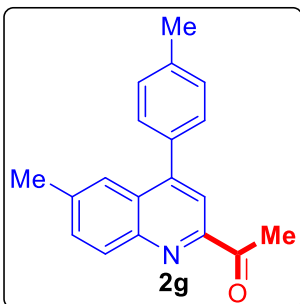

general procedure C on a 0.15 mmol scale to obtain as a white solid (39 mg, yield = 56 %) Mp. 185-187 °C;  $^1\text{H}$  NMR ( $\text{CDCl}_3$ , 400 MHz)  $\delta$  8.14 (d,  $J$  = 8.8 Hz, 1H), 8.02 (s, 1H), 7.747-7.743 (m, 1H), 7.60 (dd,  $J$  = 8.8, 2.0 Hz, 1H), 7.41-7.39 (m, 2H), 7.34 (d,  $J$  = 8.0 Hz, 1H), 2.88 (s, 3H), 2.49 (s, 3H), 2.47 (s, 3H);  $^{13}\text{C}$  NMR ( $\text{CDCl}_3$ , 100 MHz)  $^{13}\text{C}$  NMR (101 MHz,  $\text{cdCl}_3$ )  $\delta$  200.88, 152.00, 148.55, 146.40, 138.81, 138.37, 134.99, 131.98, 130.60, 129.42, 129.28, 128.13, 124.63, 118.22, 25.54, 22.01, 21.29. HRMS (ESI) calcd for  $\text{C}_8\text{H}_6\text{ON}_2$   $[\text{M}+\text{H}]^+$ : 275.1310 found: 275.1312.

**1,1'-(pyridine-2,3-diyl)bis(ethan-1-one) (4h):**<sup>13</sup> The title compound was prepared according to the general

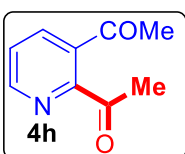

procedure C on a 0.15 mmol scale to obtain as a white solid (29 mg, yield = 70 %); Mp. 77-

78 °C;  $^1\text{H}$  NMR ( $\text{CDCl}_3$ , 400 MHz)  $\delta$  9.21 (dd,  $J = 2.4, 1.2$ , 1H), 8.34 (dd,  $J = 8.4, 2.4$ , 1H), 8.13 (dd,  $J = 8.4, 1.2$ , 1H), 2.76 (s, 3H), 2.69 (s, 3H);  $^{13}\text{C}$  NMR ( $\text{CDCl}_3$ , 100 MHz)  $\delta$  199.31, 196.18, 155.78, 149.17, 136.48, 134.22, 121.48, 27.02, 25.99.

**2-acetylnicotinonitrile (4i):** The title compound was prepared according to the general procedure C on a 0.15

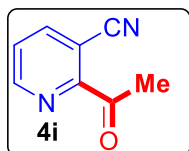

mmol scale to obtain as a white solid (20 mg, yield = 55 %); Mp. 112-114 °C;  $^1\text{H}$  NMR ( $\text{CDCl}_3$ , 400 MHz)  $\delta$  8.95 (dd,  $J = 1.6, 1.2$ , 1H), 8.16-8.10 (m, 2H), 2.75 (s, 3H);  $^{13}\text{C}$  NMR ( $\text{CDCl}_3$ , 100 MHz)  $\delta$  198.51, 167.70, 155.05, 151.75, 140.35, 121.21, 116.01, 112.88, 25.81.

HRMS (ESI) calcd for  $\text{C}_8\text{H}_6\text{ON}_2$   $[\text{M}+\text{H}]^+$ : 146.0480; found: 146.0485.

**3-acetylnicotinonitrile (4j):**<sup>14</sup> The title compound was prepared according to the general procedure C on a 0.15

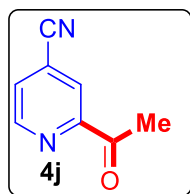

mmol scale to obtain as a white solid (26 mg, yield = 72 %); Mp. 88-90 °C;  $^1\text{H}$  NMR ( $\text{CDCl}_3$ , 400 MHz)  $\delta$  8.88 (dd,  $J = 4.8, 0.8$ , 1H), 8.26 (dd,  $J = 1.6, 1.2$ , 1H), 7.70 (dd,  $J = 3.2, 1.6$ , 1H), 2.74 (s, 3H);  $^{13}\text{C}$  NMR ( $\text{CDCl}_3$ , 100 MHz)  $\delta$  198.14, 150.01, 128.06, 126.20, 123.40, 121.64, 115.86, 25.62.

**1-(quinoxalin-2-yl)ethan-1-one (4k):**<sup>11</sup> The title compound was prepared according to the general procedure C

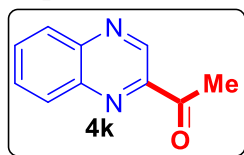

on a 0.15 mmol scale to obtain as a white solid (34 mg, yield = 81 %); Mp. 77-79 °C;  $^1\text{H}$  NMR ( $\text{CDCl}_3$ , 400 MHz)  $\delta$  9.50 (s, 1H), 8.22-8.16 (m, 2H), 7.92-7.84 (m, 2H), 2.86 (s, 3H);  $^{13}\text{C}$  NMR ( $\text{CDCl}_3$ , 100 MHz)  $\delta$  199.77, 146.54, 143.84, 143.02, 141.04, 132.17,

130.69, 130.45, 129.39, 25.52.

**1-(3-phenylquinoxalin-2-yl)ethan-1-one (4l):**<sup>15</sup> The title compound was prepared according to the general

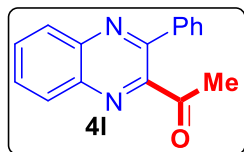

procedure C on a 0.25 mmol scale to obtain as a white solid (47 mg, yield = 77 %); Mp. 107-109 °C;  $^1\text{H}$  NMR ( $\text{CDCl}_3$ , 400 MHz)  $\delta$  8.19-8.16 (m, 2H), 7.89-7.80 (m, 2H), 7.65-7.63 (m, 2H), 7.52-7.48 (m, 3H), 2.76 (s, 3H);  $^{13}\text{C}$  NMR ( $\text{CDCl}_3$ , 100 MHz)  $\delta$  201.17,

152.44, 150.03, 142.32, 139.72, 137.97, 131.82, 130.41, 129.57, 129.39, 129.32, 128.90, 128.62, 28.48.

**1-(3-(p-tolyl)quinoxalin-2-yl)ethan-1-one (4m):** The title compound was prepared according to the general

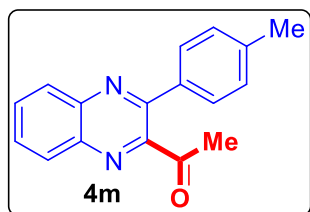

procedure C on a 0.25 mmol scale to obtain as a white solid (48 mg, yield = 74%); Mp. 114-116 °C;  $^1\text{H}$  NMR ( $\text{CDCl}_3$ , 400 MHz)  $\delta$  8.17-8.15(m, 2H), 7.88-7.85 (m, 2H), 7.56-7.35 (m, 2H), 7.32 (d,  $J = 8.0$ , 2H), 2.74 (s, 3H), 2.43 (s, 3H);  $^{13}\text{C}$  NMR ( $\text{CDCl}_3$ , 100 MHz)  $\delta$  201.42, 152.33, 150.23, 142.37, 139.60, 135.03, 132.61,

132.02, 131.68, 130.60, 130.21, 129.53, 129.40, 129.27, 128.86, 28.58, 21.40. HRMS (ESI) calcd for  $\text{C}_{17}\text{H}_{14}\text{ON}_2$   $[\text{M}+\text{H}]^+$ : 262.1106; found: 262.1107.

**1-(3-(naphthalen-2-yl)quinoxalin-2-yl)ethan-1-one (4n):** The title compound was prepared according to the

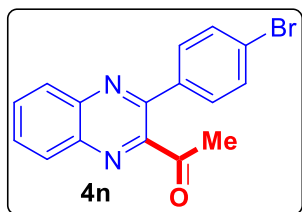

general procedure C on a 0.25 mmol scale to obtain as a white solid (57 mg, yield = 70 %); Mp. 182-184 °C;  $^1\text{H}$  NMR ( $\text{CDCl}_3$ , 400 MHz)  $\delta$  8.17 (dddd,  $J = 8.5, 7.0, 1.6, 0.6$  Hz, 2H), 7.86 (dddd,  $J = 16.8, 8.0, 6.9, 1.6$  Hz, 2H), 7.65-7.61 (m, 2H), 7.52-7.48 (m, 2H), 2.81 (s, 3H), 2.81 (s, 3H);  $^{13}\text{C}$  NMR ( $\text{CDCl}_3$ , 100 MHz)  $\delta$

200.83, 151.49, 149.19, 142.29, 139.75, 137.01, 132.09, 131.71, 130.65, 130.53, 129.63, 129.27, 123.97, 28.28. HRMS (ESI) calcd for  $\text{C}_{16}\text{H}_{11}\text{BrON}_2$   $[\text{M}+\text{H}]^+$ : 326.0055; found: 326.0056.

**1-(3-(4-chlorophenyl)quinoxalin-2-yl)ethan-1-one (4o):** The title compound was prepared according to the

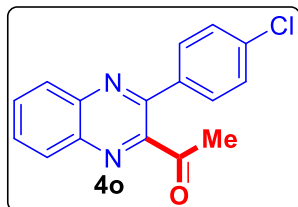

general procedure C on a 0.25 mmol scale to obtain as a white solid (59 mg, yield = 85 %) Mp. 167-169 °C;  $^1\text{H}$  NMR ( $\text{CDCl}_3$ , 400 MHz)  $\delta$  8.19-8.14 (m, 2H), 7.85 (dddd,  $J = 16.7, 8.0, 6.9, 1.6$  Hz, 2H), 7.60-7.56 (m, 2H), 7.49-7.45 (m, 2H), 2.81 (s, 3H);  $^{13}\text{C}$  NMR ( $\text{CDCl}_3$ , 100 MHz)  $\delta$  200.84, 151.39, 149.23, 142.26, 139.72,

136.52, 135.61, 132.06, 130.62, 130.28, 129.60, 129.25, 128.76, 28.28. HRMS (ESI) calcd for  $\text{C}_{16}\text{H}_{11}\text{ClON}_2$   $[\text{M}+\text{H}]^+$ : 282.0560; found: 282.0562.

**1-(3-(naphthalen-2-yl)quinoxalin-2-yl)ethan-1-one (4p):** The title compound was prepared according to the

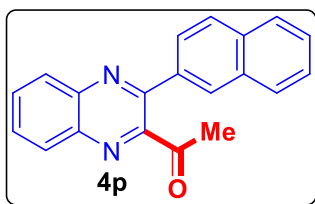

general procedure C on a 0.25 mmol scale to obtain as a white solid (54 mg, yield = 73 %); Mp. 160-162 °C;  $^1\text{H}$  NMR ( $\text{CDCl}_3$ , 400 MHz)  $\delta$  8.22-8.16 (m, 3H), 7.96-7.80 (m, 5H), 7.71 (dd,  $J = 8.4, 2.0$  Hz, 1H), 7.56-7.51 (m, 2H), 2.78 (s, 3H);  $^{13}\text{C}$  NMR ( $\text{CDCl}_3$ , 100 MHz)  $\delta$  201.20, 152.34, 150.12, 142.38, 139.70, 135.35, 133.53,

133.14, 131.85, 130.42, 129.59, 129.29, 128.82, 128.66, 128.26, 127.73, 126.98, 126.48, 126.11, 28.47. HRMS (ESI) calcd for  $\text{C}_{20}\text{H}_{14}\text{ON}_2$   $[\text{M}+\text{H}]^+$ : 298.1106; found: 298.1112.

**1-(6,7-dimethyl-3-phenylquinoxalin-2-yl)ethan-1-one (4q):** The title compound was prepared according to the

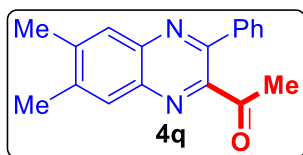

general procedure C on a 0.25 mmol scale to obtain as a white solid (49 mg, yield = 71%); Mp. 102-104 °C;  $^1\text{H}$  NMR ( $\text{CDCl}_3$ , 400 MHz)  $\delta$  7.92 (d,  $J = 0.8$  Hz, 2H), 7.62-7.59 (m, 2H), 7.48-7.47 (m, 3H), 2.74 (s, 3H), 2.53 (s, 6H);  $^{13}\text{C}$  NMR

( $\text{CDCl}_3$ , 100 MHz)  $\delta$  201.36, 151.65, 149.03, 142.88, 141.33, 141.19, 138.69, 138.35, 129.08, 128.86, 128.50, 128.45, 128.28, 28.44, 20.61, 20.38. HRMS (ESI) calcd for  $\text{C}_{18}\text{H}_{16}\text{ON}_2$   $[\text{M}+\text{H}]^+$ : 276.1263; found: 276.1265.

**1-(7-chloro-3-phenylquinoxalin-2-yl)ethan-1-one (4r):** The title compound was prepared according to the

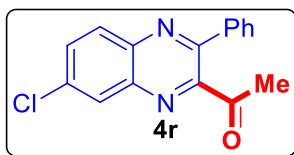

general procedure C on a 0.25 mmol scale to obtain as a white solid (51 mg, yield = 73 %) Mp. 137-139 °C;  $^1\text{H}$  NMR ( $\text{CDCl}_3$ , 400 MHz)  $\delta$  8.17 (d,  $J = 2.0$  Hz, 1H), 8.11 (d,  $J = 9.2$  Hz, 1H), 7.76 (dd,  $J = 8.8, 2.4$  Hz, 1H), 7.64 -7.61 (m, 2H), 7.52 -

7.49 (m, 3H), 2.75 (s, 3H);  $^{13}\text{C}$  NMR ( $\text{CDCl}_3$ , 100 MHz)  $\delta$  200.78, 153.34, 150.03, 142.57, 138.17, 137.84, 137.50, 131.51, 130.74, 129.69, 128.92, 128.65, 128.21, 28.41. HRMS (ESI) calcd for  $\text{C}_{17}\text{H}_{14}\text{ON}_2$   $[\text{M}+\text{H}]^+$ : 282.0560; found: 282.0556.

**1-(4-phenylquinazolin-2-yl)ethan-1-one (4s):**<sup>15</sup> The title compound was prepared according to the general

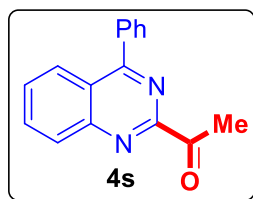

procedure C on a 0.25 mmol scale to obtain as a white solid (43 mg, yield = 69%); Mp. 106-108 °C;  $^1\text{H}$  NMR ( $\text{CDCl}_3$ , 400 MHz)  $\delta$  8.31 (ddd,  $J$  = 8.4, 0.8, 0.4 Hz, 1H), 8.21 (ddd,  $J$  = 8.4, 1.2, 0.8 Hz, 1H), 8.00 (ddd,  $J$  = 8.4, 7.2, 1.6 Hz, 1H), 7.85-7.82 (m, 2H), 7.73 (ddd,  $J$  = 8.4, 7.2, 1.2 Hz, 1H), 7.60-7.59 (m, 3H), 2.94 (s, 3H);  $^{13}\text{C}$  NMR ( $\text{CDCl}_3$ , 100 MHz)  $\delta$  198.77, 169.27, 155.87, 151.12, 136.79, 134.20, 130.30, 130.25, 130.21, 129.50, 128.65, 127.12, 123.22, 27.20.

**1-(4,6-diphenylquinazolin-2-yl)ethan-1-one (4t):**<sup>16</sup> The title compound was prepared according to the general

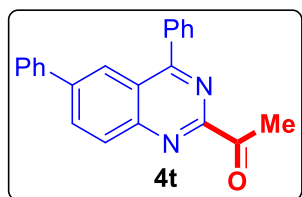

procedure C on a 0.25 mmol scale to obtain as a white solid (34 mg, yield = 42%); Mp. 106-108 °C;  $^1\text{H}$  NMR ( $\text{CDCl}_3$ , 400 MHz)  $\delta$  8.39-8.35 (m, 2H), 8.26 (dd,  $J$  = 8.8, 2.0 Hz, 1H), 7.89-7.87 (m, 2H), 7.65-7.60 (m, 5H), 7.51-7.47 (m, 2H), 7.44-7.43 (m, 1H), 2.96 (s, 3H);  $^{13}\text{C}$  NMR ( $\text{CDCl}_3$ , 100 MHz)  $\delta$  198.69, 169.22, 155.69, 150.47, 142.44, 139.40, 136.84, 133.94, 130.70, 130.36, 130.20, 129.16, 128.76, 128.47, 127.50, 124.48, 123.46, 27.20.

**1-(6-bromo-4-phenylquinazolin-2-yl)ethan-1-one (4u):** The title compound was prepared according to the

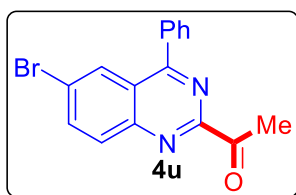

general procedure C on a 0.25 mmol scale to obtain as a white solid (47 mg, yield = 42 %) Mp. 127-29 °C;  $^1\text{H}$  NMR ( $\text{CDCl}_3$ , 400 MHz)  $\delta$  8.35 (dd,  $J$  = 2.0, 0.4 Hz, 1H), 8.18 (dd,  $J$  = 8.8, 0.4 Hz, 1H), 8.06 (dd,  $J$  = 9.2, 2.4 Hz, 1H), 7.83-7.80 (m, 2H), 7.63-7.16 (m, 3H), 2.92 (s, 3H);  $^{13}\text{C}$  NMR ( $\text{CDCl}_3$ , 100 MHz)  $\delta$  198.31, 168.41, 155.89, 149.82, 137.87, 136.17, 131.87, 130.64, 130.09, 130.04, 129.97, 129.24, 128.88, 124.14, 123.80, 27.15. HRMS (ESI) calcd for  $\text{C}_{16}\text{H}_{11}\text{BrON}_2$   $[\text{M}+\text{H}]^+$ : 326.0055; found: 326.0056.

**1-(6-chloro-4-phenylquinazolin-2-yl)ethan-1-one (4v):**<sup>16</sup> The title compound was prepared according to the

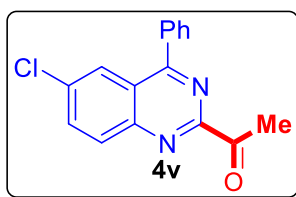

general procedure C on a 0.25 mmol scale to obtain as a white solid (42 mg, yield = 59%) Mp. 102-104 °C;  $^1\text{H}$  NMR ( $\text{CDCl}_3$ , 400 MHz)  $\delta$  8.25 (d,  $J$  = 9.2 Hz, 1H), 8.17 (d,  $J$  = 2.0 Hz, 1H), 7.93 (dd,  $J$  = 9.2, 2.4 Hz, 1H), 7.82 (dd,  $J$  = 6.0, 2.0 Hz, 2H), 7.62 (dd,  $J$  = 5.6, 2.4 Hz, 1H), 2.92 (s, 3H);  $^{13}\text{C}$  NMR ( $\text{CDCl}_3$ , 100 MHz) 198.32,

168.53, 155.92, 149.64, 136.22, 135.57, 135.31, 131.89, 130.64, 130.09, 128.89, 125.92, 123.77, 102.92, 27.16



**1-(benzo[d]thiazol-2-yl)ethan-1-one (4w):**<sup>17</sup> The title compound was prepared according to the general procedure C on a 0.25 mmol scale to obtain as a white solid (31 mg, yield = 70 %) Mp. 105-107 °C; <sup>1</sup>H NMR (CDCl<sub>3</sub>, 400 MHz) δ 8.19 (ddd, *J* = 7.6, 1.2, 0.4, 1H), 7.98 (ddd, *J* = 8.0, 1.6, 0.8, 1H), 7.60-7.55 (m, 1H), 7.55-7.50 (m, 1H), 2.83 (s, 3H); <sup>13</sup>C NMR (CDCl<sub>3</sub>, 100 MHz) δ 198.51, 167.70, 155.05, 151.75, 140.35, 121.21, 116.01, 112.88, 25.81.

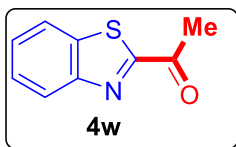

**1-(quinolin-2-yl)ethan-1-one (4x):**<sup>17</sup> The title compound was prepared according to the general procedure C on a 0.25 mmol scale to obtain as a white solid (22 mg, yield = 42 %) Mp. 94-96 °C; <sup>1</sup>H NMR (CDCl<sub>3</sub>, 400 MHz) δ 8.14-8.07 (m, 3H), 8.43 (dd, *J* = 9.2, 2.8 Hz, 1H), 7.11 (d, *J* = 2.8 Hz, 1H), 2.96 (s, 3H), 2.84 (s, 3H); <sup>13</sup>C NMR (CDCl<sub>3</sub>, 100 MHz) δ 200.49, 159.44, 151.23, 143.19, 135.27, 132.02, 131.00, 123.06, 118.46, 104.86.

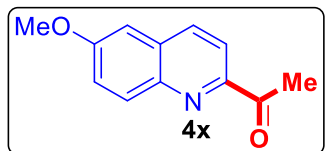

**1,1'-(quinoline-2,4-diyl)bis(ethan-1-one) (4a'):**<sup>11</sup> The title compound was prepared according to the general procedure C on a 0.25 mmol scale to obtain as a white solid (14 mg, yield = 26%) Mp. 67-69 °C; <sup>1</sup>H NMR (CDCl<sub>3</sub>, 400 MHz) δ 8.57-8.54 (m, 1H), 8.37 (s, 1H), 8.25 (ddd, *J* = 8.4, 1.5, 0.8 Hz, 1H), 7.83 (ddd, *J* = 8.4, 6.8, 2.4 Hz, 1H), 7.76-7.72 (m, 1H), 2.89 (s, 3H), 2.79 (s, 3H); <sup>13</sup>C NMR (CDCl<sub>3</sub>, 100 MHz) δ 200.99, 199.99, 152.64, 148.31, 142.94, 131.01, 130.38, 130.31, 125.64, 124.99, 116.97, 29.94, 25.38.

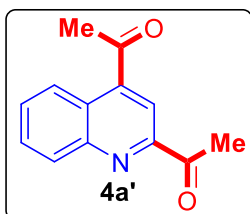

**1,1'-(6-bromoquinoline-2,4-diyl)bis(ethan-1-one) (4c'):** The title compound was prepared according to the general procedure C on a 0.25 mmol scale to obtain as a white solid (15 mg, yield = 21%) Mp. 68-70 °C; <sup>1</sup>H NMR (CDCl<sub>3</sub>, 400 MHz) δ 8.85 (d, *J* = 2.0 Hz, 1H), 8.24 (s, 1H), 8.11 (d, *J* = 6.8 Hz, 1H), 7.91 (dd, *J* = 7.2, 2.0 Hz, 1H), 2.87 (s, 3H), 2.79 (s, 3H); <sup>13</sup>C NMR (CDCl<sub>3</sub>, 100 MHz) δ 200.27, 199.60, 152.86, 146.98, 141.39, 134.07, 132.37, 128.28, 125.97, 125.59, 118.10, 29.71, 25.35. HRMS (ESI) calcd for C<sub>13</sub>H<sub>10</sub>BrNO<sub>2</sub> [M+H]<sup>+</sup>: 290.9895; found: 290.9893

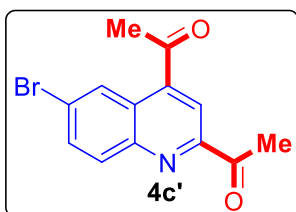

## (5) X-ray Analysis

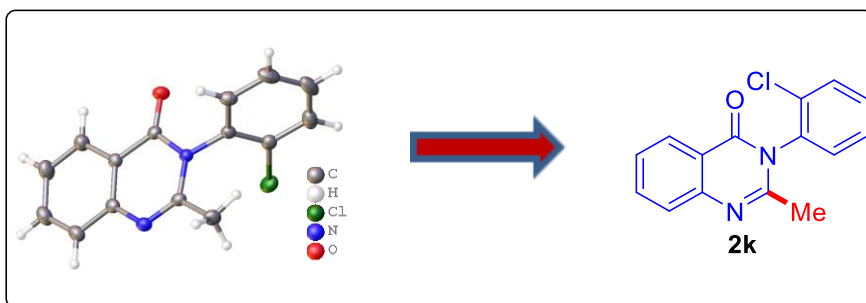

Table S1. Crystal data and structure refinement for **2k**.

|                                   |                                                     |                   |
|-----------------------------------|-----------------------------------------------------|-------------------|
| Identification code               | <b>2k</b>                                           |                   |
| Empirical formula                 | C <sub>15</sub> H <sub>11</sub> Cl N <sub>2</sub> O |                   |
| Formula weight                    | 270.71                                              |                   |
| Temperature                       | 150(2) K                                            |                   |
| Wavelength                        | 0.71073 Å                                           |                   |
| Crystal system                    | Monoclinic                                          |                   |
| Space group                       | P2 <sub>1</sub> /c                                  |                   |
| Unit cell dimensions              | a = 17.6237(6) Å                                    | a = 90°.          |
|                                   | b = 5.6260(2) Å                                     | b = 98.1143(15)°. |
|                                   | c = 12.7950(5) Å                                    | g = 90°.          |
| Volume                            | 1255.94(8) Å <sup>3</sup>                           |                   |
| Z                                 | 4                                                   |                   |
| Density (calculated)              | 1.432 Mg/m <sup>3</sup>                             |                   |
| Absorption coefficient            | 0.296 mm <sup>-1</sup>                              |                   |
| F(000)                            | 560                                                 |                   |
| Crystal size                      | 0.390 x 0.230 x 0.200 mm <sup>3</sup>               |                   |
| Theta range for data collection   | 3.263 to 27.916°.                                   |                   |
| Index ranges                      | -23 ≤ h ≤ 23, -7 ≤ k ≤ 7, -16 ≤ l ≤ 16              |                   |
| Reflections collected             | 24365                                               |                   |
| Independent reflections           | 2977 [R(int) = 0.0299]                              |                   |
| Completeness to theta = 25.242°   | 98.2 %                                              |                   |
| Absorption correction             | Semi-empirical from equivalents                     |                   |
| Max. and min. transmission        | 0.9281 and 0.8677                                   |                   |
| Refinement method                 | Full-matrix least-squares on F <sup>2</sup>         |                   |
| Data / restraints / parameters    | 2977 / 0 / 172                                      |                   |
| Goodness-of-fit on F <sup>2</sup> | 1.038                                               |                   |
| Final R indices [I > 2σ(I)]       | R1 = 0.0459, wR2 = 0.1444                           |                   |

|                             |                                    |
|-----------------------------|------------------------------------|
| R indices (all data)        | R1 = 0.0501, wR2 = 0.1508          |
| Extinction coefficient      | n/a                                |
| Largest diff. peak and hole | 0.728 and -0.682 e.Å <sup>-3</sup> |

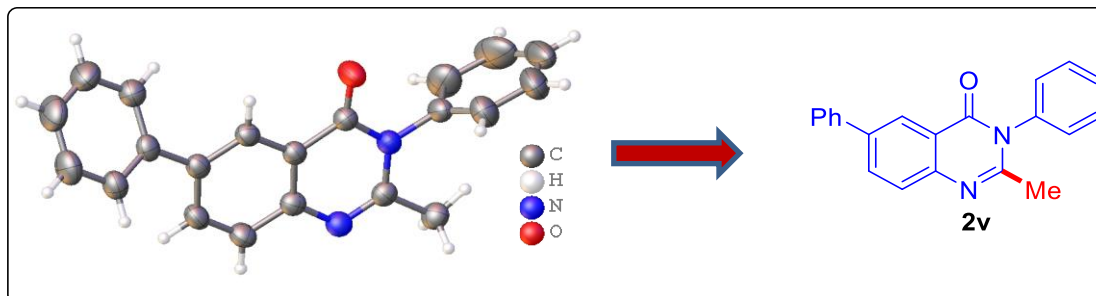

Table S1. Crystal data and structure refinement for **2v**.

|                                 |                                                  |                   |
|---------------------------------|--------------------------------------------------|-------------------|
| Identification code             | <b>2v</b>                                        |                   |
| Empirical formula               | C <sub>21</sub> H <sub>16</sub> N <sub>2</sub> O |                   |
| Formula weight                  | 312.36                                           |                   |
| Temperature                     | 301(2) K                                         |                   |
| Wavelength                      | 0.71073 Å                                        |                   |
| Crystal system                  | Monoclinic                                       |                   |
| Space group                     | P2 <sub>1</sub> /c                               |                   |
| Unit cell dimensions            | a = 14.5419(6) Å                                 | a = 90°.          |
|                                 | b = 15.7313(6) Å                                 | b = 91.8219(17)°. |
|                                 | c = 7.0669(3) Å                                  | g = 90°.          |
| Volume                          | 1615.83(11) Å <sup>3</sup>                       |                   |
| Z                               | 4                                                |                   |
| Density (calculated)            | 1.284 Mg/m <sup>3</sup>                          |                   |
| Absorption coefficient          | 0.080 mm <sup>-1</sup>                           |                   |
| F(000)                          | 656                                              |                   |
| Crystal size                    | 0.520 x 0.410 x 0.130 mm <sup>3</sup>            |                   |
| Theta range for data collection | 2.945 to 27.093°.                                |                   |
| Index ranges                    | -18 ≤ h ≤ 18, -20 ≤ k ≤ 20, -9 ≤ l ≤ 9           |                   |
| Reflections collected           | 29530                                            |                   |
| Independent reflections         | 3531 [R(int) = 0.0482]                           |                   |
| Completeness to theta = 25.242° | 99.0 %                                           |                   |
| Absorption correction           | Semi-empirical from equivalents                  |                   |

|                                   |                                             |
|-----------------------------------|---------------------------------------------|
| Max. and min. transmission        | 0.9281 and 0.8374                           |
| Refinement method                 | Full-matrix least-squares on F <sup>2</sup> |
| Data / restraints / parameters    | 3531 / 0 / 217                              |
| Goodness-of-fit on F <sup>2</sup> | 1.052                                       |
| Final R indices [I>2sigma(I)]     | R1 = 0.0703, wR2 = 0.2011                   |
| R indices (all data)              | R1 = 0.0964, wR2 = 0.2456                   |
| Extinction coefficient            | n/a                                         |
| Largest diff. peak and hole       | 0.522 and -0.423 e.Å <sup>-3</sup>          |

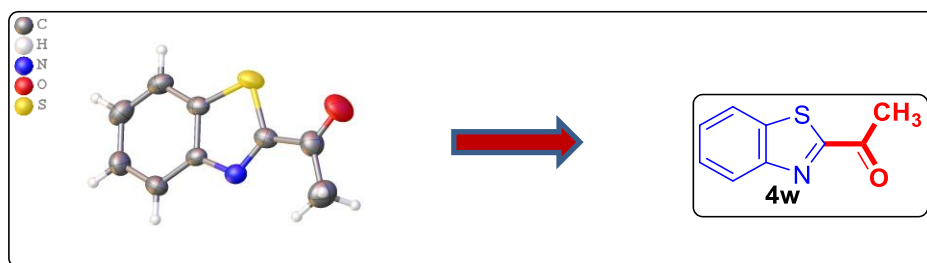

Table S1. Crystal data and structure refinement for **4w**.

|                        |                                     |                 |
|------------------------|-------------------------------------|-----------------|
| Identification code    | <b>4x</b>                           |                 |
| Empirical formula      | C <sub>9</sub> H <sub>7</sub> N O S |                 |
| Formula weight         | 177.22                              |                 |
| Temperature            | 285(2) K                            |                 |
| Wavelength             | 0.71073 Å                           |                 |
| Crystal system         | Monoclinic                          |                 |
| Space group            | P2 <sub>1</sub> /n                  |                 |
| Unit cell dimensions   | a = 5.7146(8) Å                     | a = 90°.        |
|                        | b = 10.4692(19) Å                   | b = 97.873(6)°. |
|                        | c = 13.978(3) Å                     | g = 90°.        |
| Volume                 | 828.4(2) Å <sup>3</sup>             |                 |
| Z                      | 4                                   |                 |
| Density (calculated)   | 1.421 Mg/m <sup>3</sup>             |                 |
| Absorption coefficient | 0.334 mm <sup>-1</sup>              |                 |
| F(000)                 | 368                                 |                 |

|                                   |                                             |
|-----------------------------------|---------------------------------------------|
| Crystal size                      | 0.600 x 0.320 x 0.160 mm <sup>3</sup>       |
| Theta range for data collection   | 3.528 to 26.721°.                           |
| Index ranges                      | -7<=h<=7, -13<=k<=13, -17<=l<=17            |
| Reflections collected             | 11618                                       |
| Independent reflections           | 1644 [R (int) = 0.0463]                     |
| Completeness to theta = 25.242°   | 96.9 %                                      |
| Absorption correction             | Semi-empirical from equivalents             |
| Max. and min. transmission        | 0.9268 and 0.7078                           |
| Refinement method                 | Full-matrix least-squares on F <sup>2</sup> |
| Data / restraints / parameters    | 1644 / 0 / 109                              |
| Goodness-of-fit on F <sup>2</sup> | 1.102                                       |
| Final R indices [I>2sigma(I)]     | R1 = 0.0616, wR2 = 0.1553                   |
| R indices (all data)              | R1 = 0.0853, wR2 = 0.1754                   |
| Extinction coefficient            | n/a                                         |
| Largest diff. peak and hole       | 0.314 and -0.394 e.Å <sup>-3</sup>          |

**(6) References:**

- 1 G. C. Senadi, V. S. Kudale, J.-J. Wang, *Green Chem.* 2019, **21**, 979-985.
- 2 W. Xu, X.-R. Zhu, P.-C. Qian, X.-G. Zhang, C.-L. Deng, *Synlett* 2016, **27**, 2851-2857.
- 3 M. K. Shivananda, B. S. Holla, *J. Chem. Pharm. Res.* 2011, **3**, 83-86.
- 4 J. A. Chong, C. Fanger, G. R. Larsen, W. C. Lumma, M. M. Moran, A. Ripka, D. J. Underwood, M. Weigele, X. Zhen, WO2007056124A2, 2007.
- 5 R. A. Kumar, C. U. Maheswari, S. Ghantasala, C. Jyothi, K. R. Reddy, *Adv. Synth. Catal.* 2011, **353**, 401-410.
- 6 N. Montazeri, K. Pourshamsian, M. Rahgol, M. Bayazi, *Asian J. Chem.* 2012, **24**, 5361-5364.
- 7 R. Bouley, D. Ding, Z. Peng, M. Bastian, E. Lastochkin, W. Song, S. Mobashery, M. Chang, M. A. Suckow, V. A. Schroeder, W. R. Wolter, *J Med Chem* 2016, **59**, 5011-21.
- 8 S. K. Ghosh, R. Nagarajan, *RSC Adv.* 2016, **6**, 27378-27387.
- 9 D. Kumar, P. S. Jadhavar, M. Nautiyal, H. Sharma, P. K. Meena, L. Adane, S. Pancholia, A. K. Chakraborti, *RSC Adv.* 2015, **5**, 30819-30825.
- 10 C.-W. Yu, P.-T. Chang, L.-W. Hsin, J.-W. Chern, *J. Med. Chem.* 2013, **56**, 6775-6791.
- 11 A. Srinivasulu, B. Shantharjun, D. Vani, K. C. Ashalu, A. Mohd, *Eur. J. Org. Chem.* 2019, 1815-1819.
- 12 C. Xu, C. W. Muir, A. G. Leach, A. R. Kennedy, A. J. B. Watson, *Angew. Chem., Int. Ed.* 2018, **57**, 11374-11377.
- 13 C. O'Murchu, *Synthesis* 1989, 880-82.
- 14 I. Eryazici, C. N. Moorefield, S. Durmus, G. R. Newkome, *J. Org. Chem.* 2006, **71**, 1009-1014.
- 15 Dubovtsev, A. Y.; Dar'in, D. V.; Kukushkin, V. Y. *Org. Lett.* 2019, **21**, 4116-4119.
- 16 A. Stempel, I. Douvan, E. Reeder, L. H. Sternbach, *J. Org. Chem.* 1967, **32**, 2417-25.
- 17 J. Liu , X. Zhang , H. Yi , C. Liu , R. Liu , H. Zhang , K. Zhuo and A. Lei , *Angew. Chem., Int. Ed.*, 2015, **54** , 1261 —1265

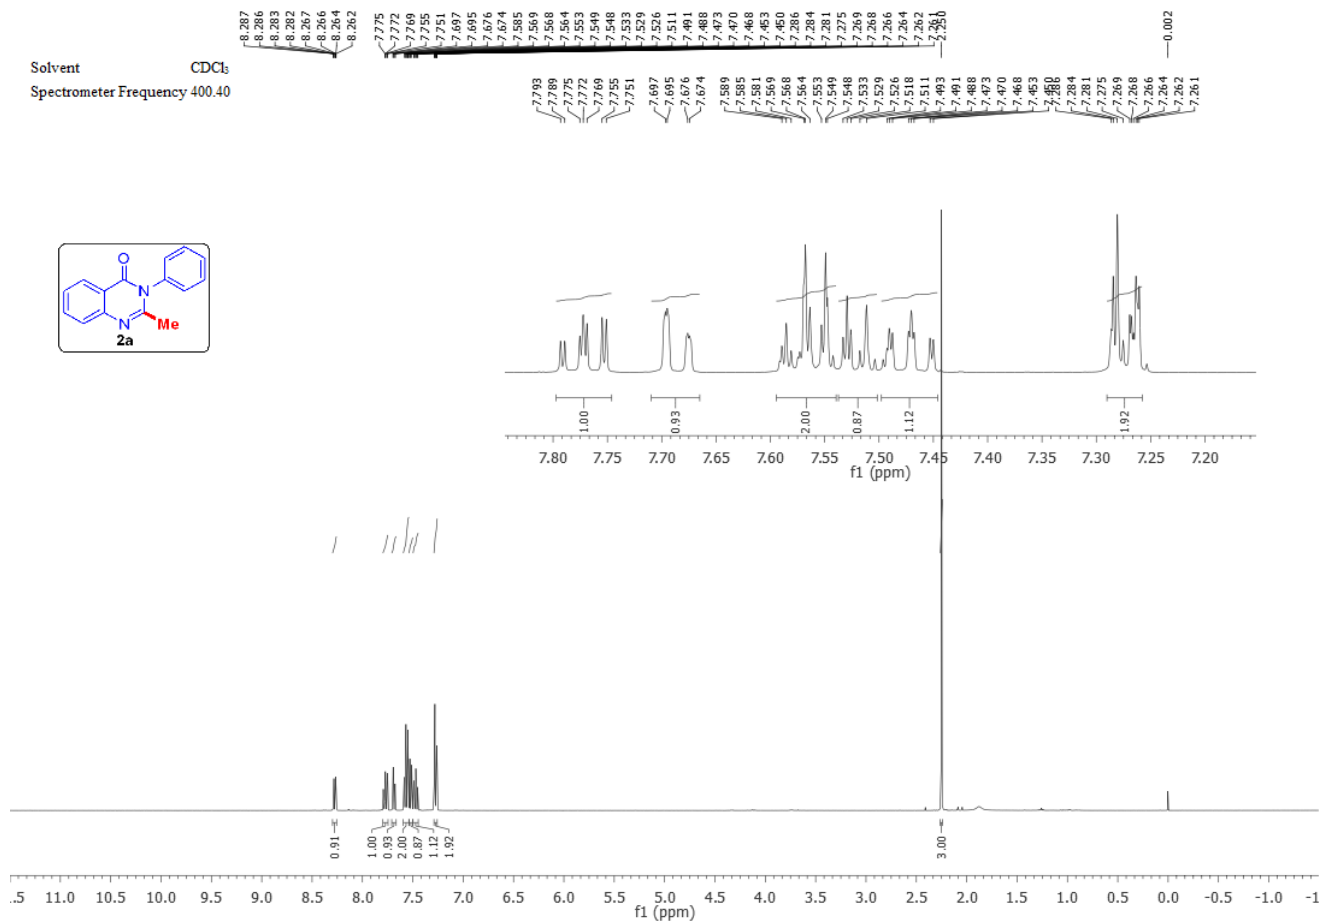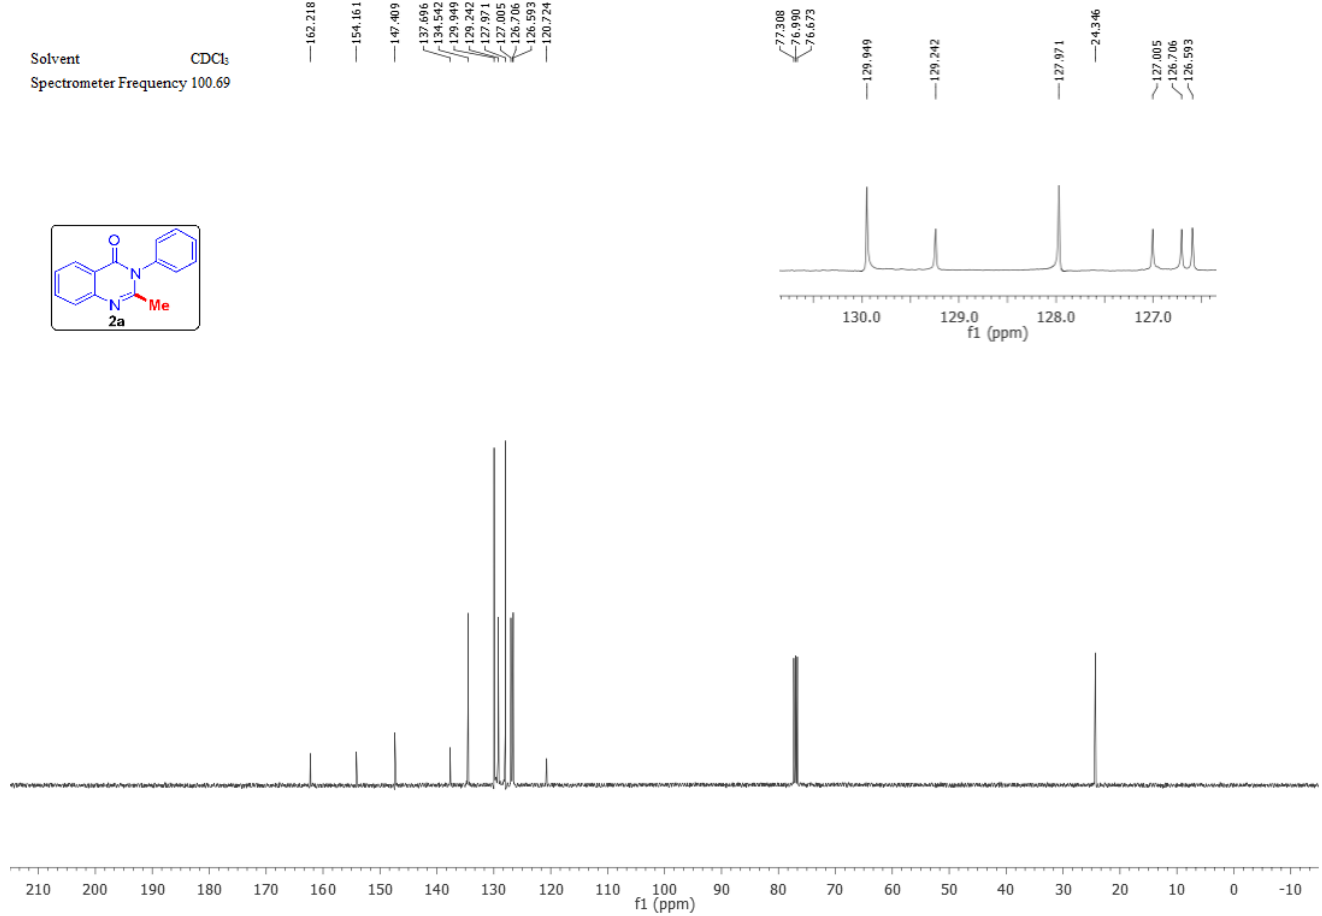

Solvent CDCl<sub>3</sub>  
Spectrometer Frequency 400.40

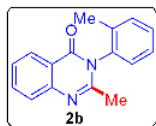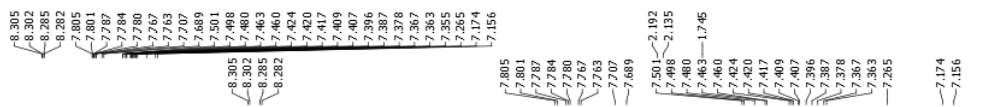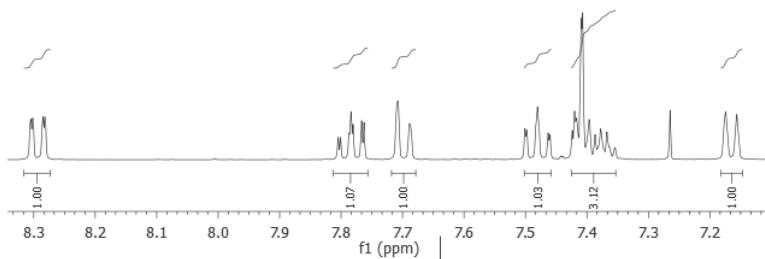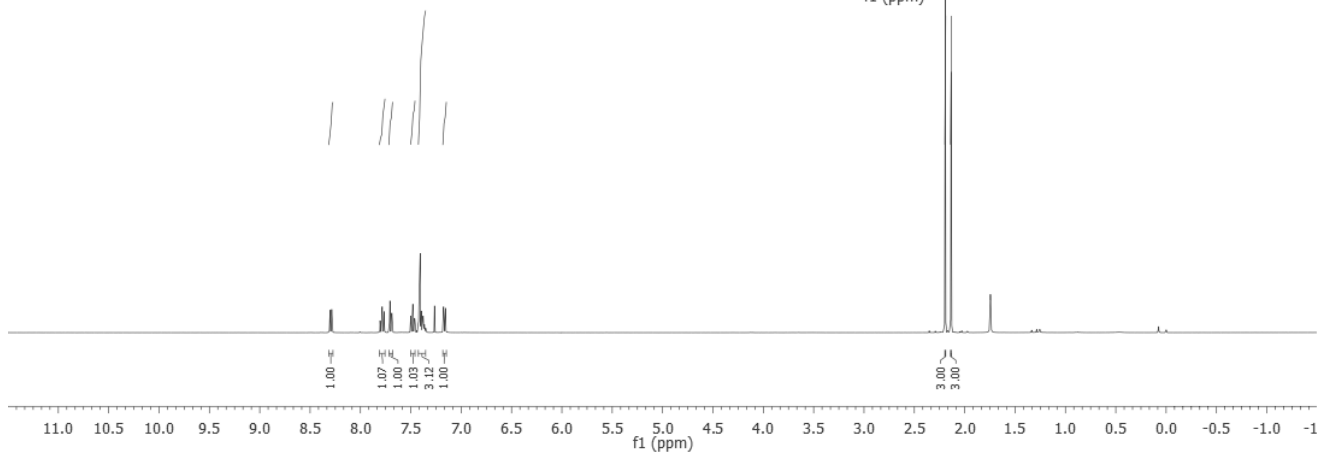

Solvent CDCl<sub>3</sub>  
Spectrometer Frequency 100.69

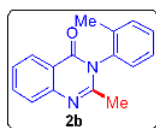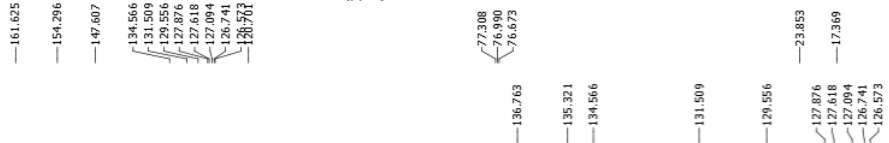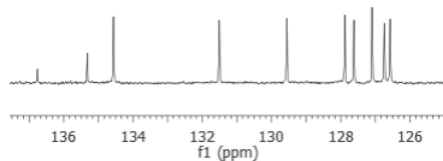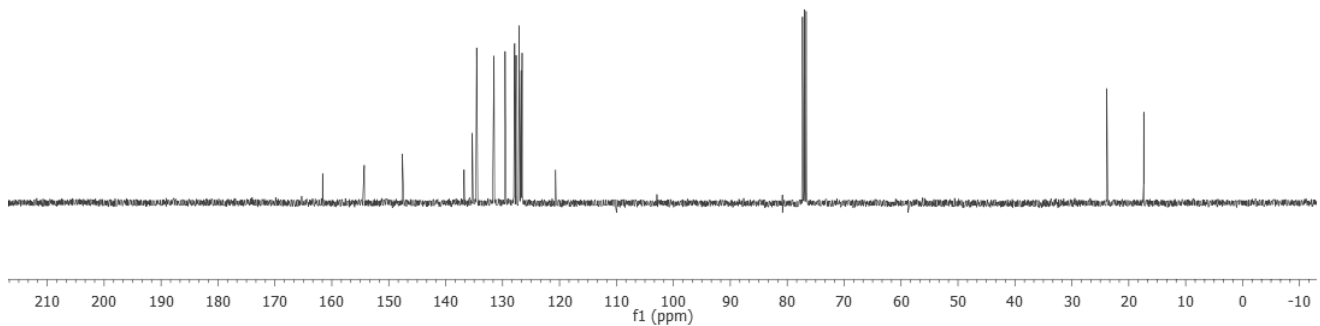



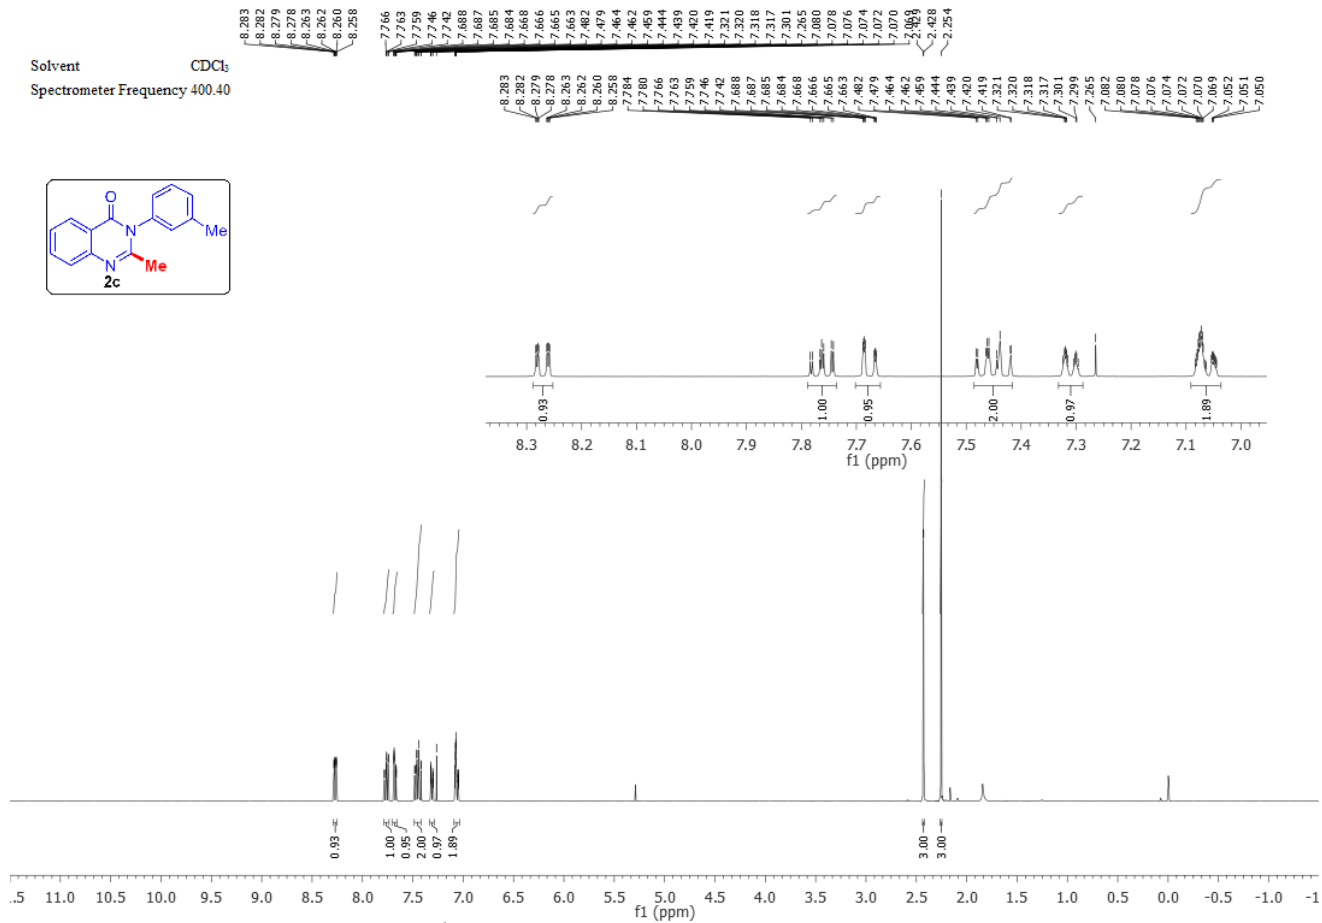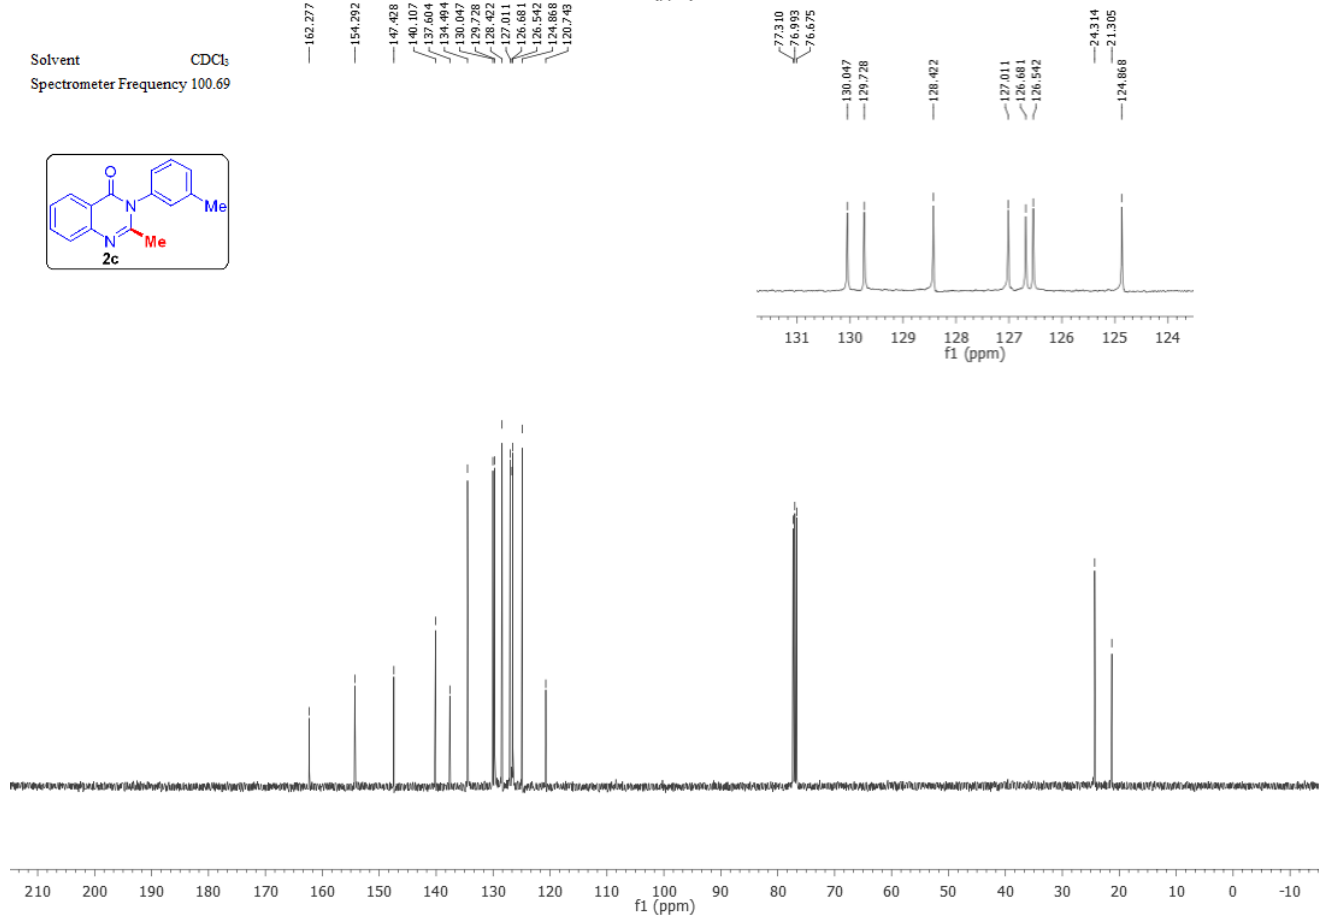

Solvent  $\text{CDCl}_3$   
Spectrometer Frequency 400.40

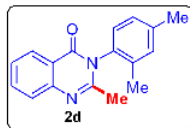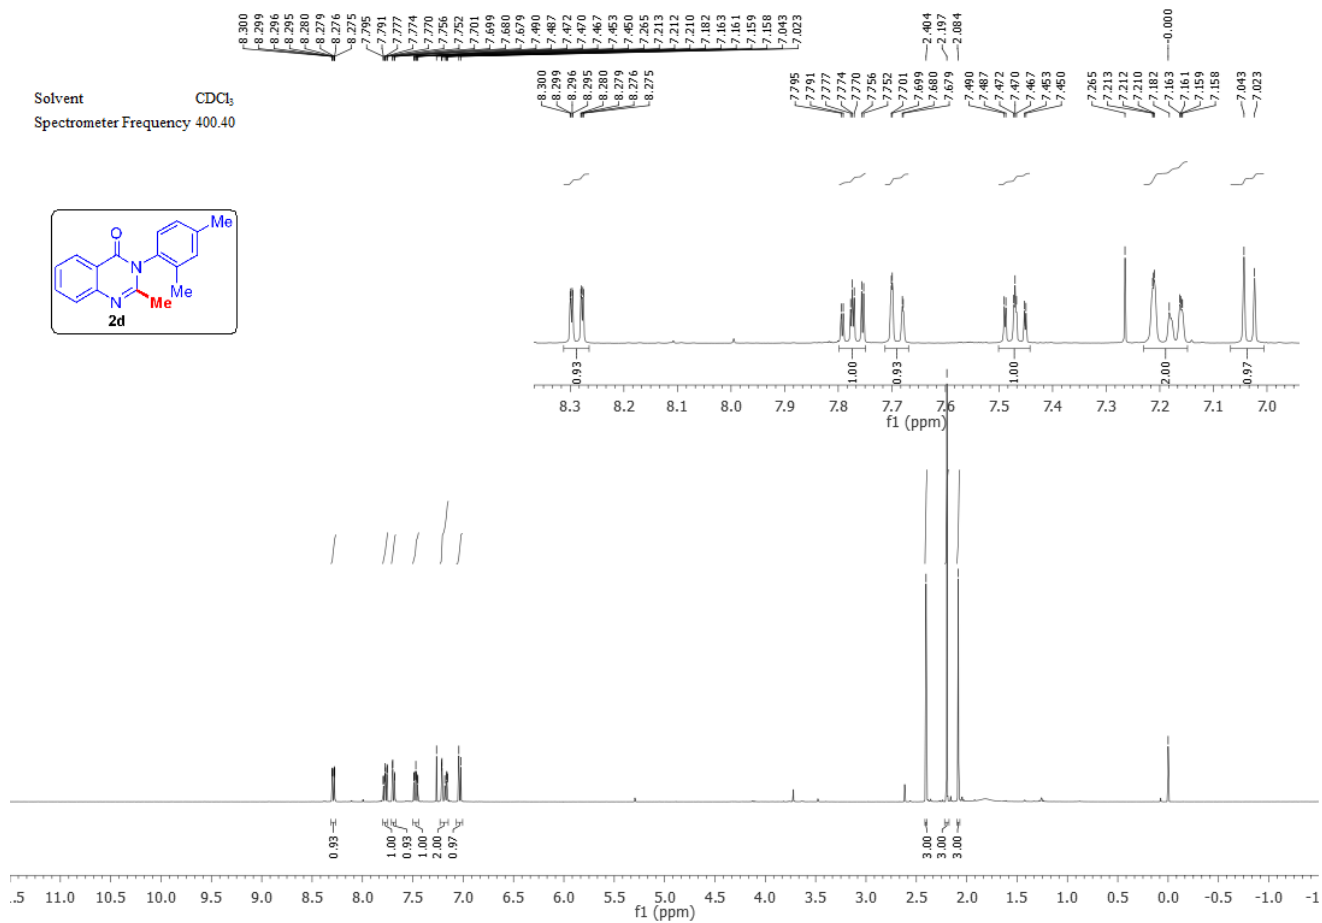

Solvent  $\text{CDCl}_3$   
Spectrometer Frequency 100.69

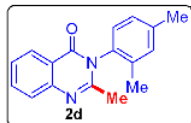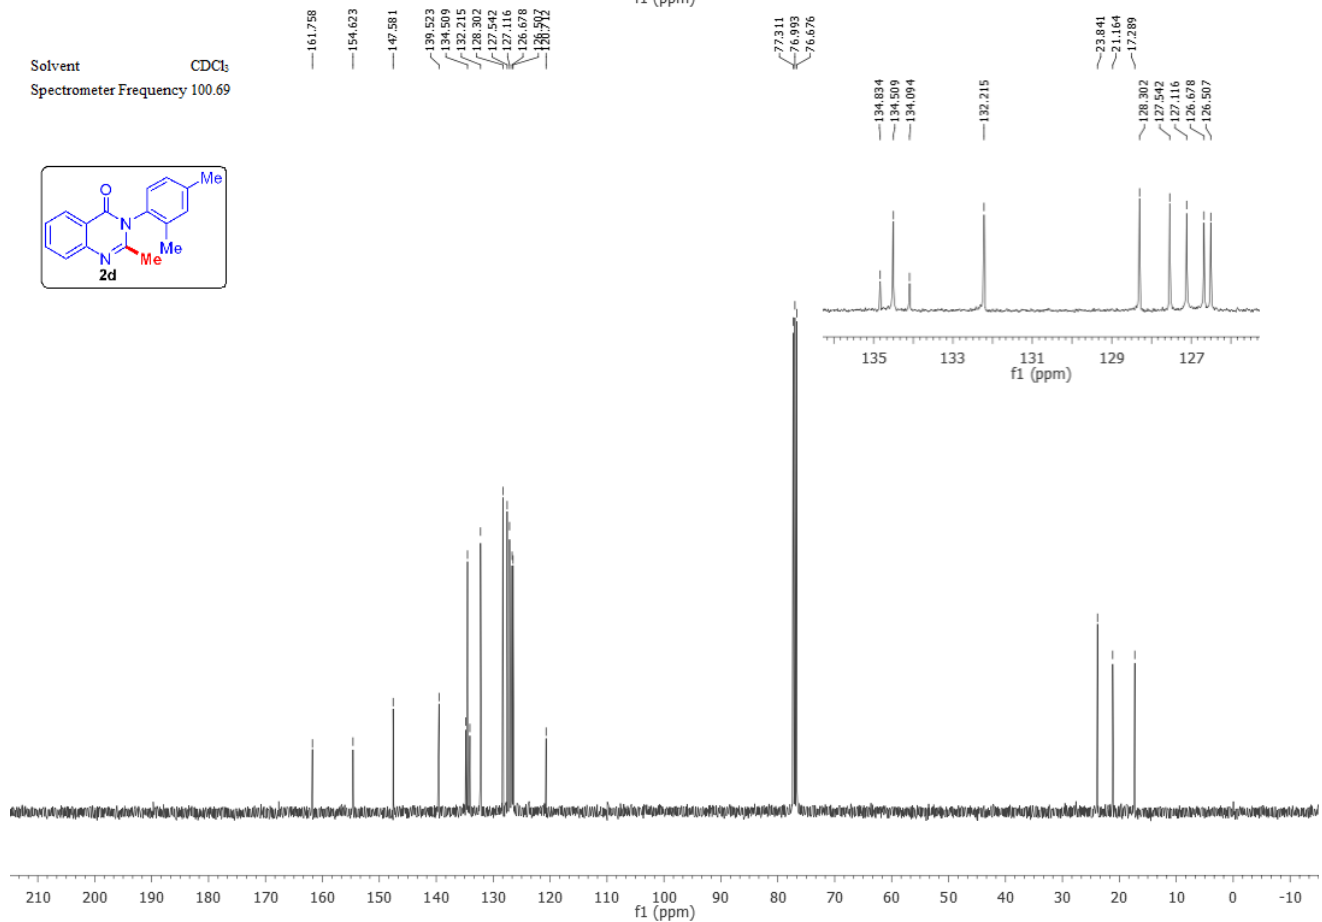



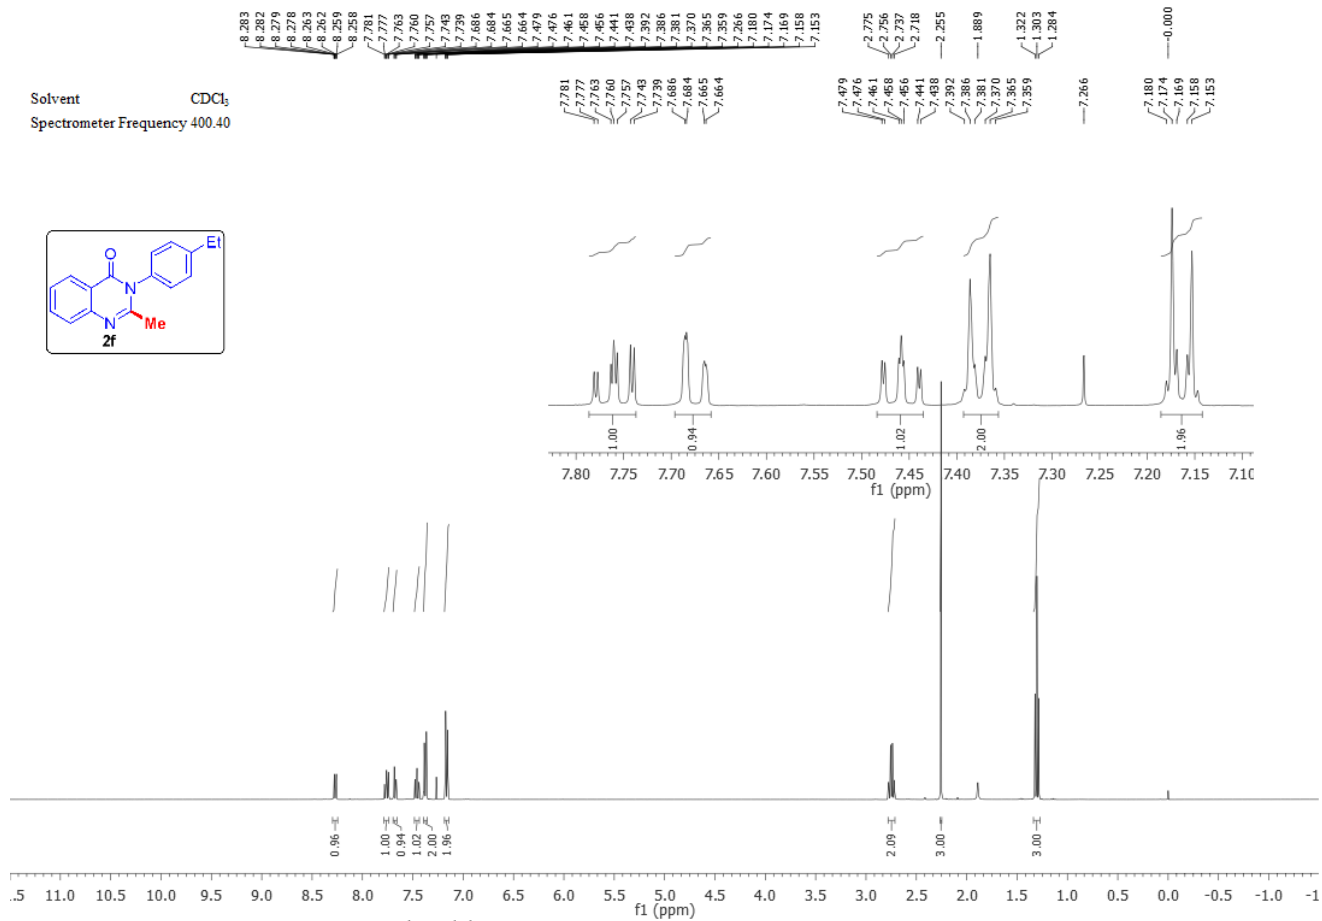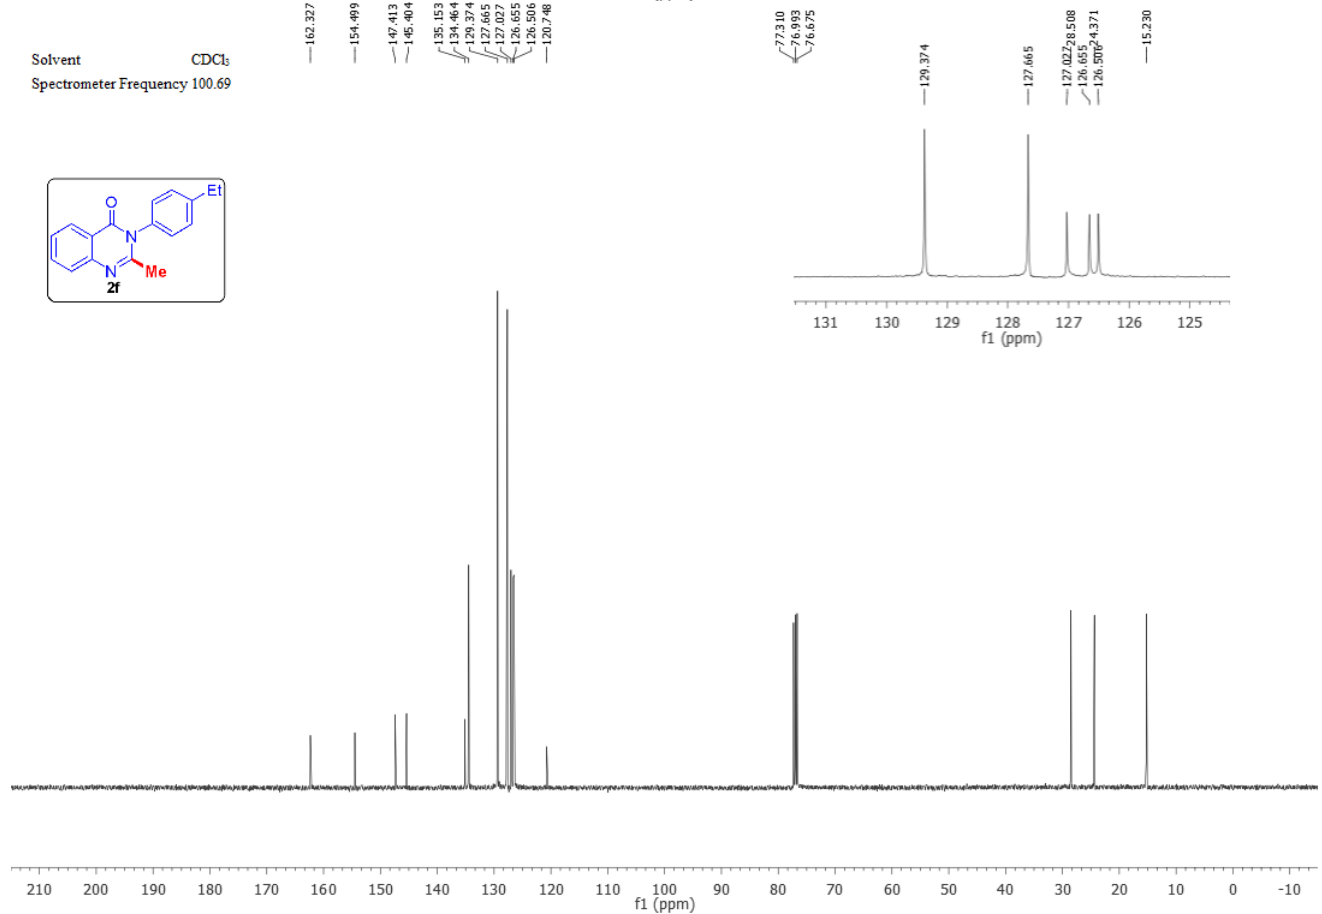



Solvent  $\text{CDCl}_3$   
Spectrometer Frequency 400.40

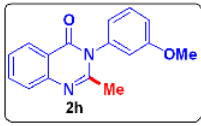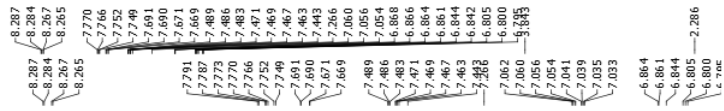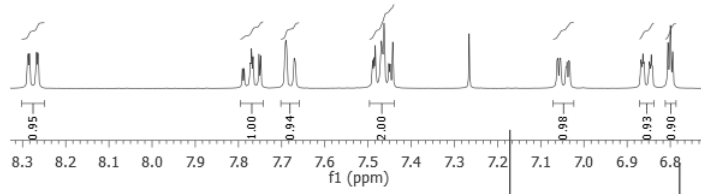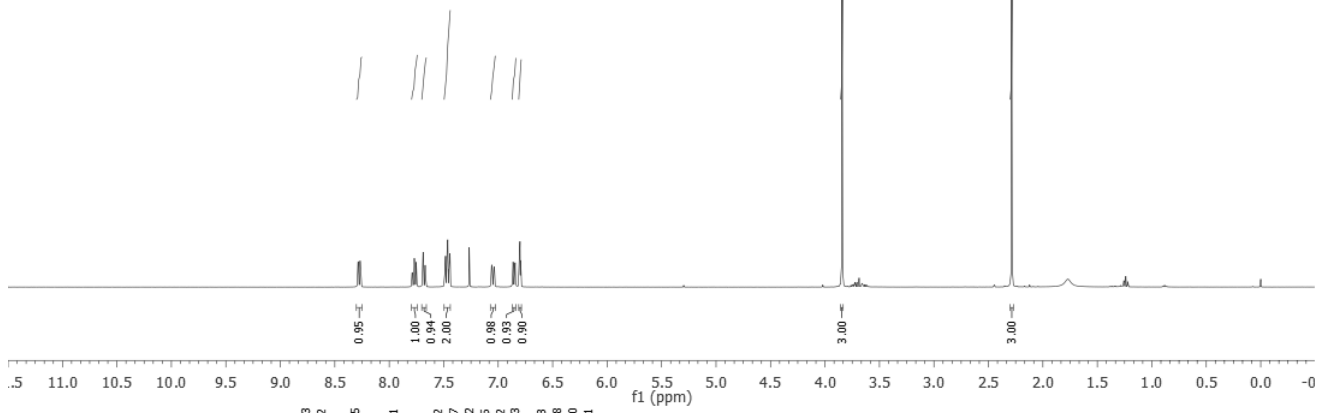

Solvent  $\text{CDCl}_3$   
Spectrometer Frequency 100.69

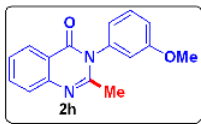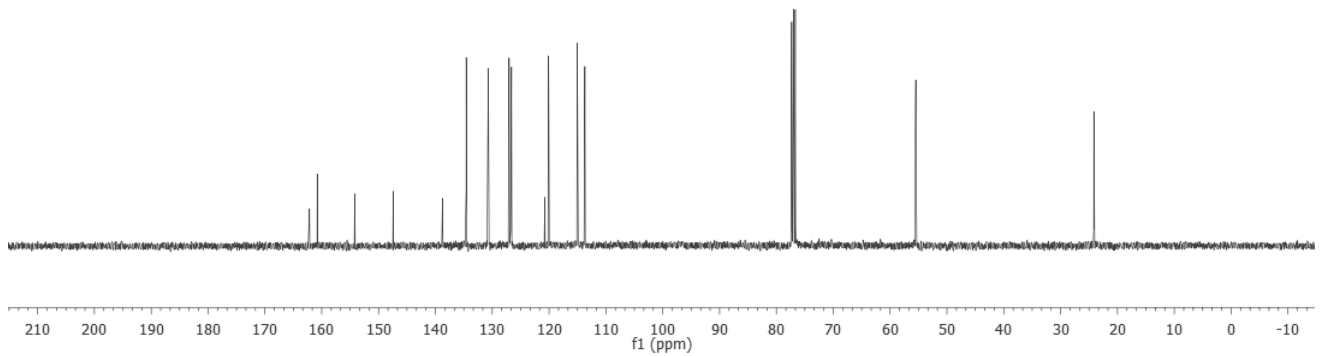

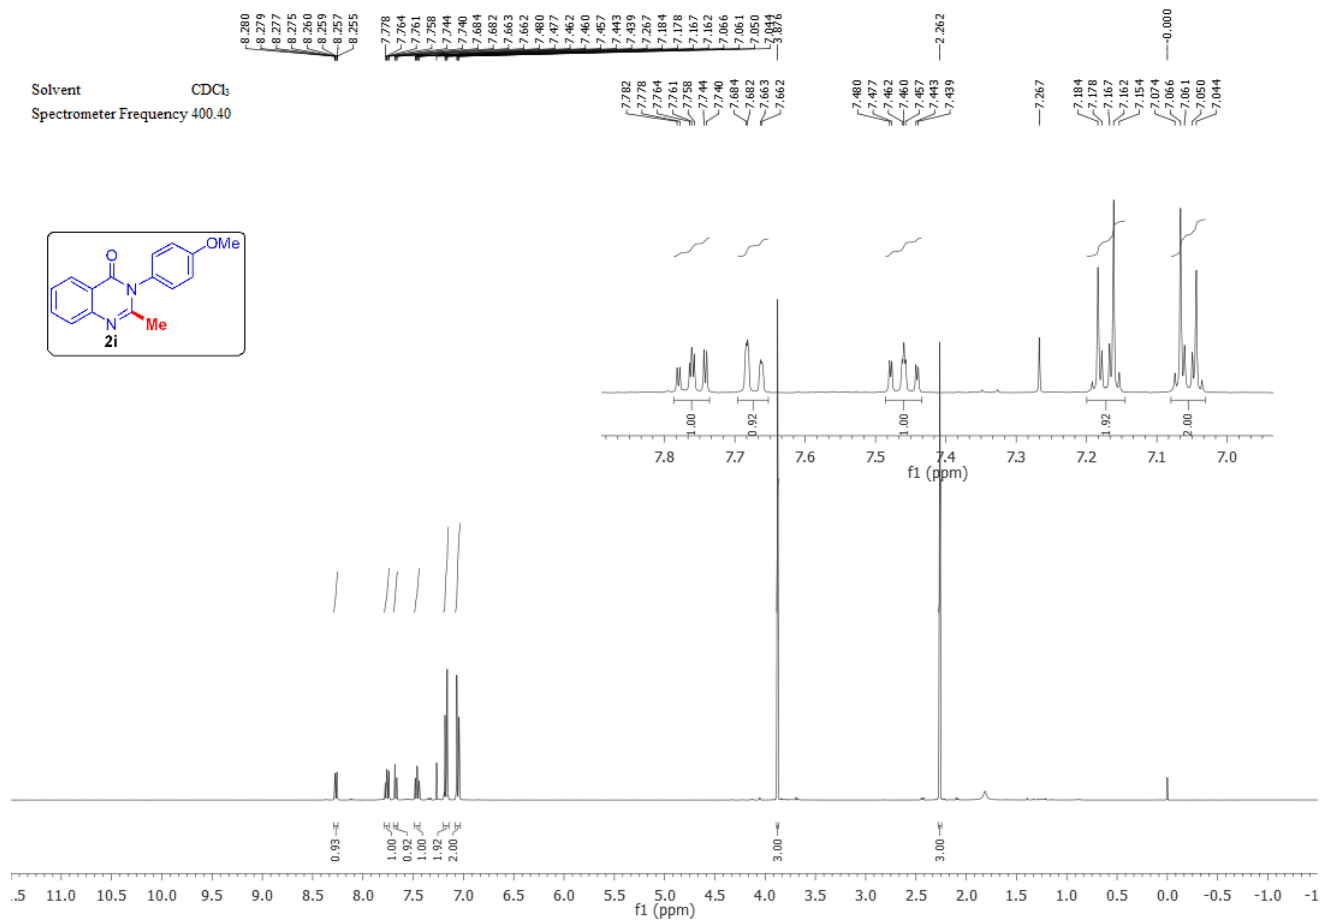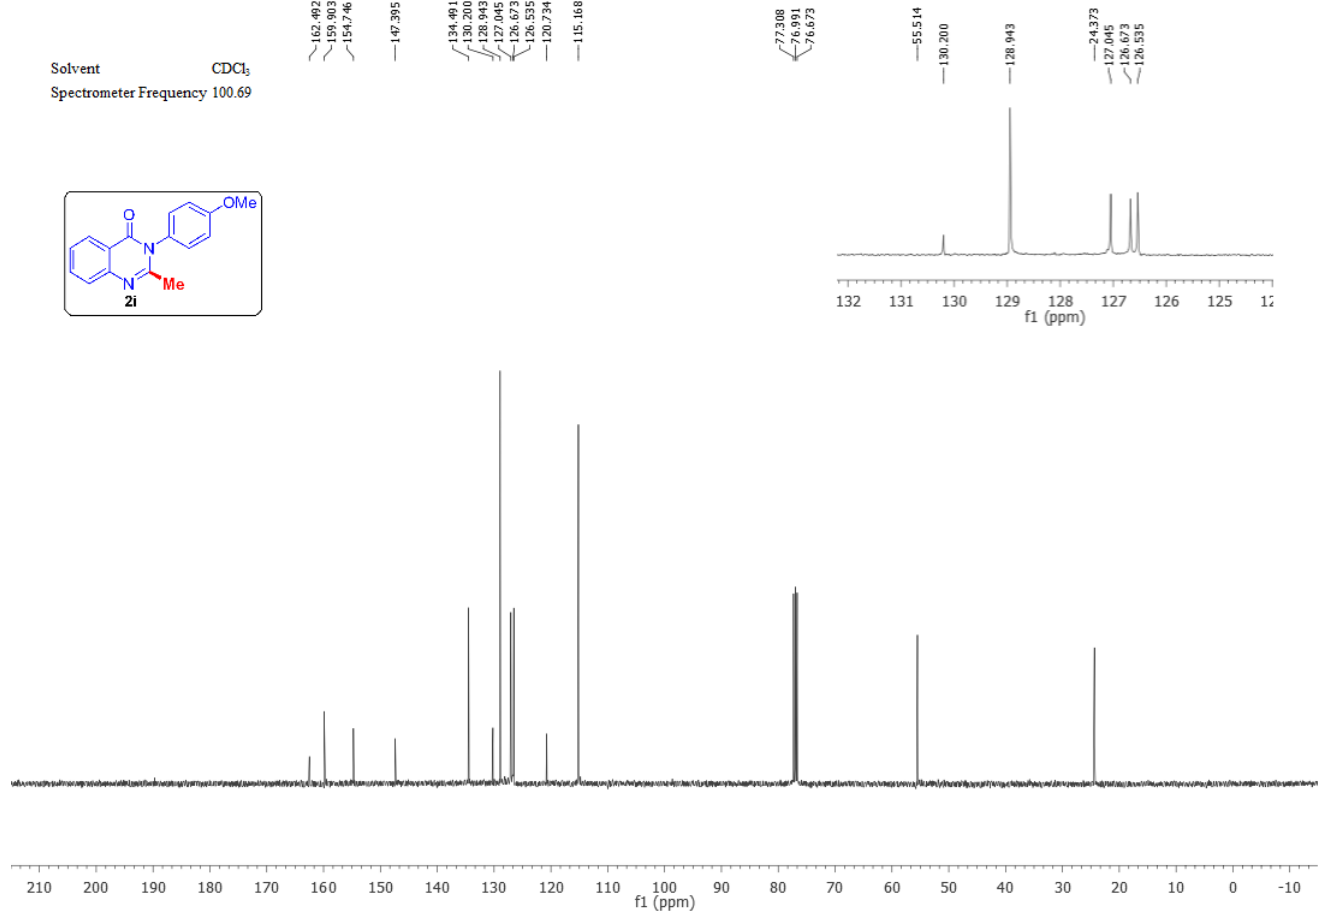





Solvent CDCl<sub>3</sub>  
Spectrometer Frequency 400.28

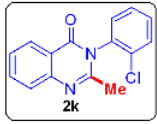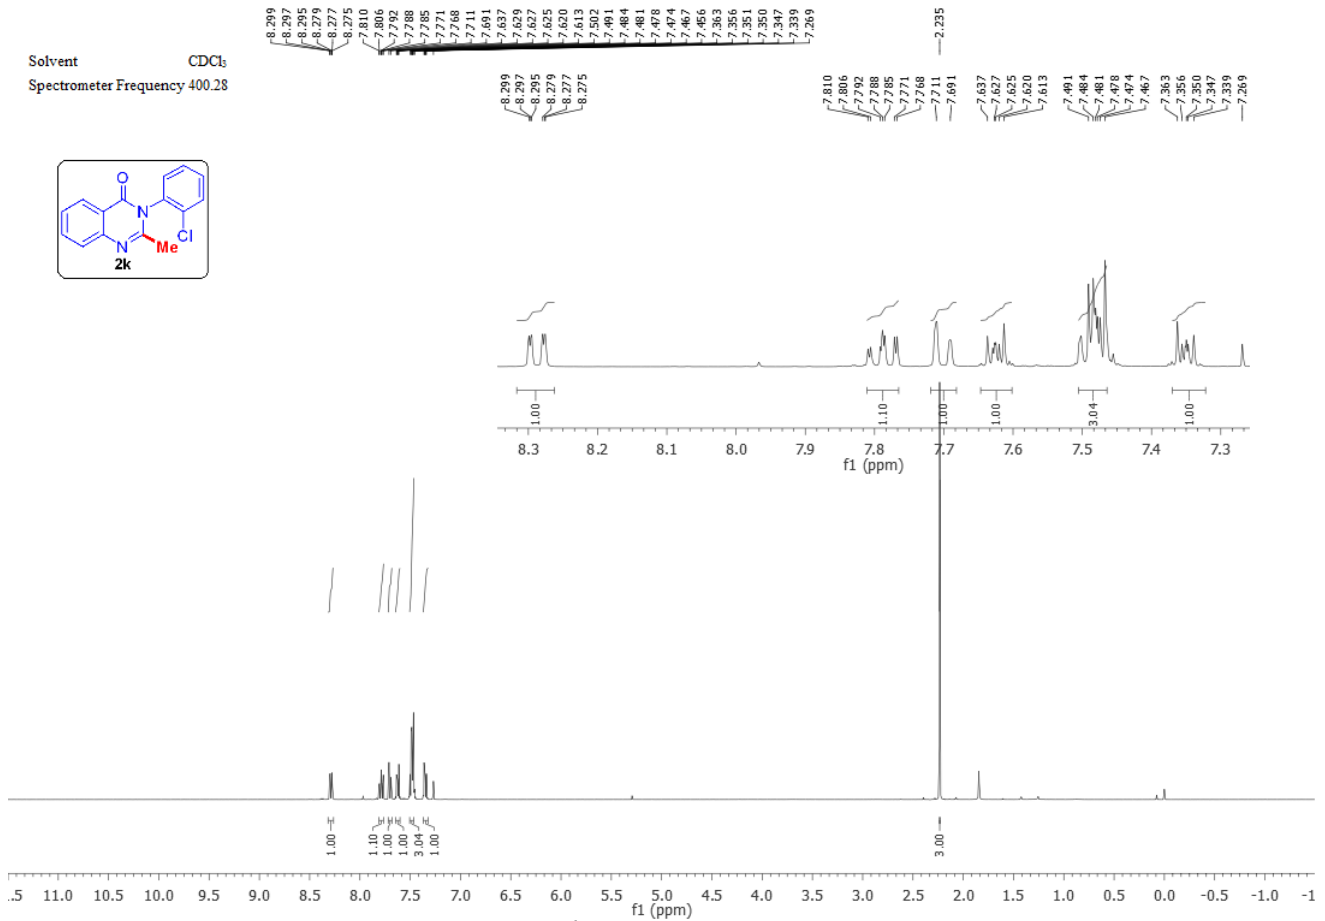

Solvent CDCl<sub>3</sub>  
Spectrometer Frequency 100.66

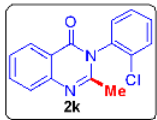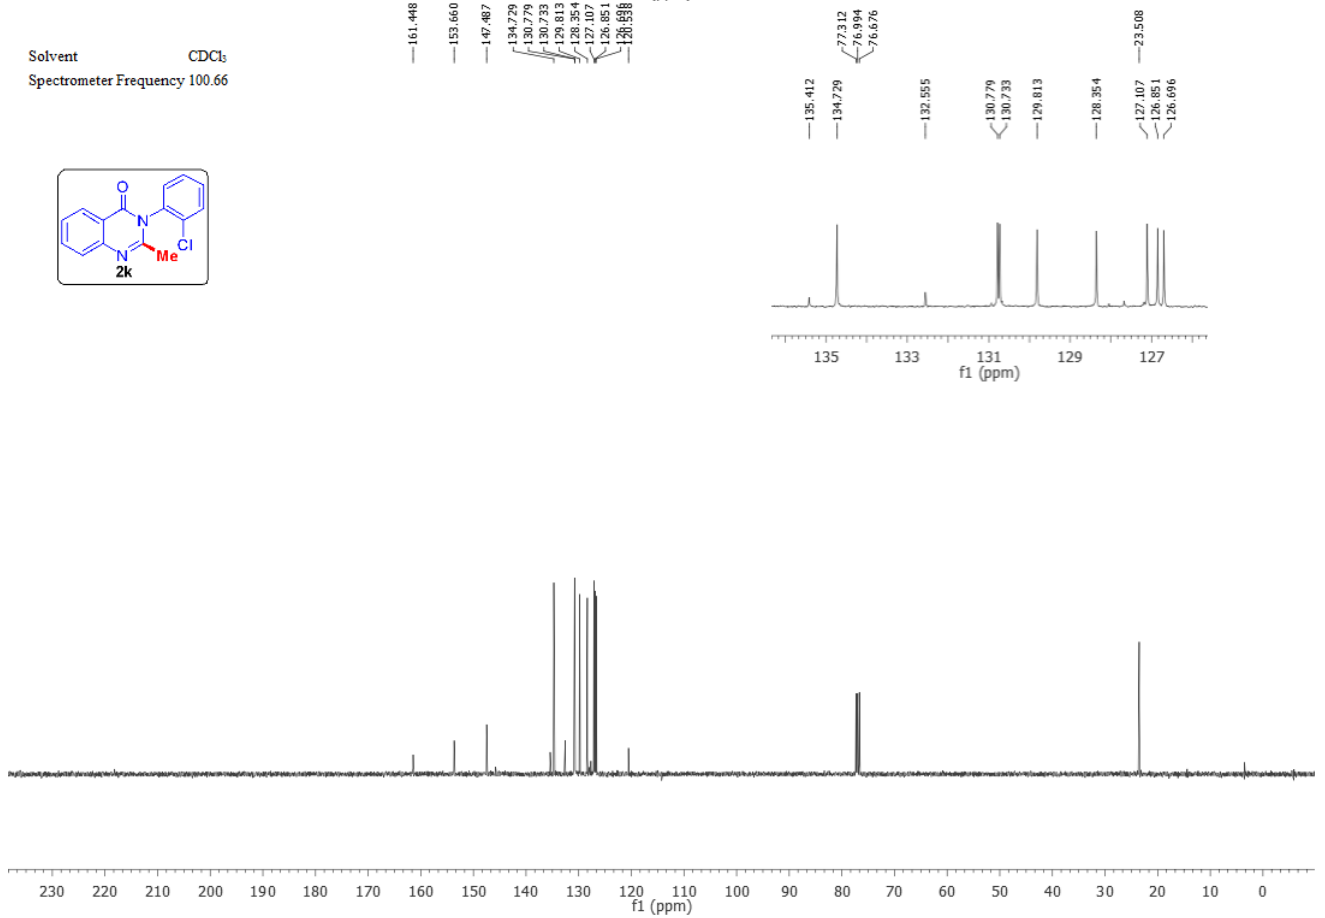

Solvent  $CDCl_3$   
Spectrometer Frequency 400.40

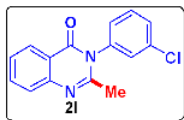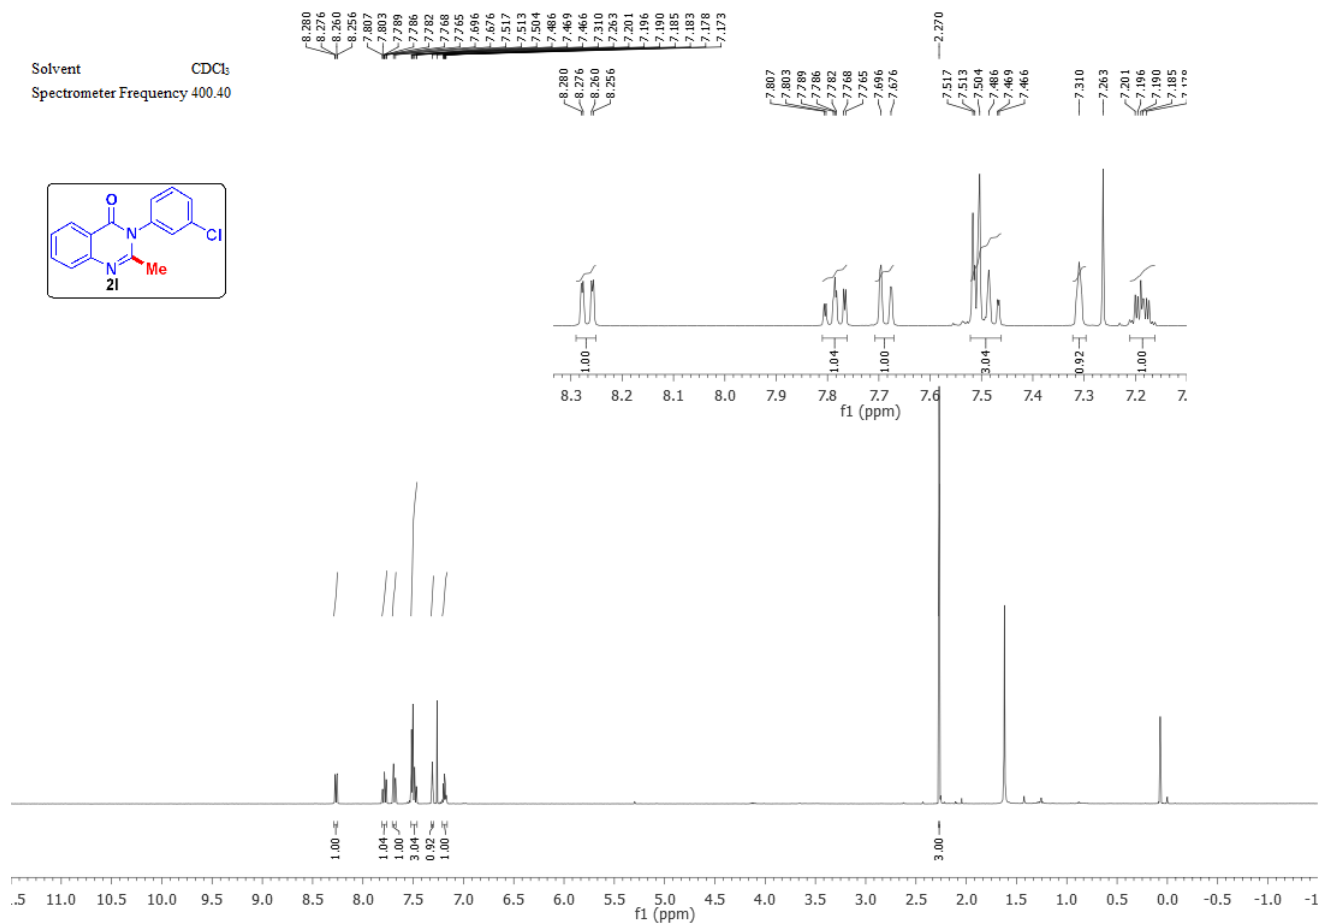

Solvent  $CDCl_3$   
Spectrometer Frequency 100.69

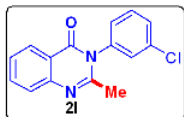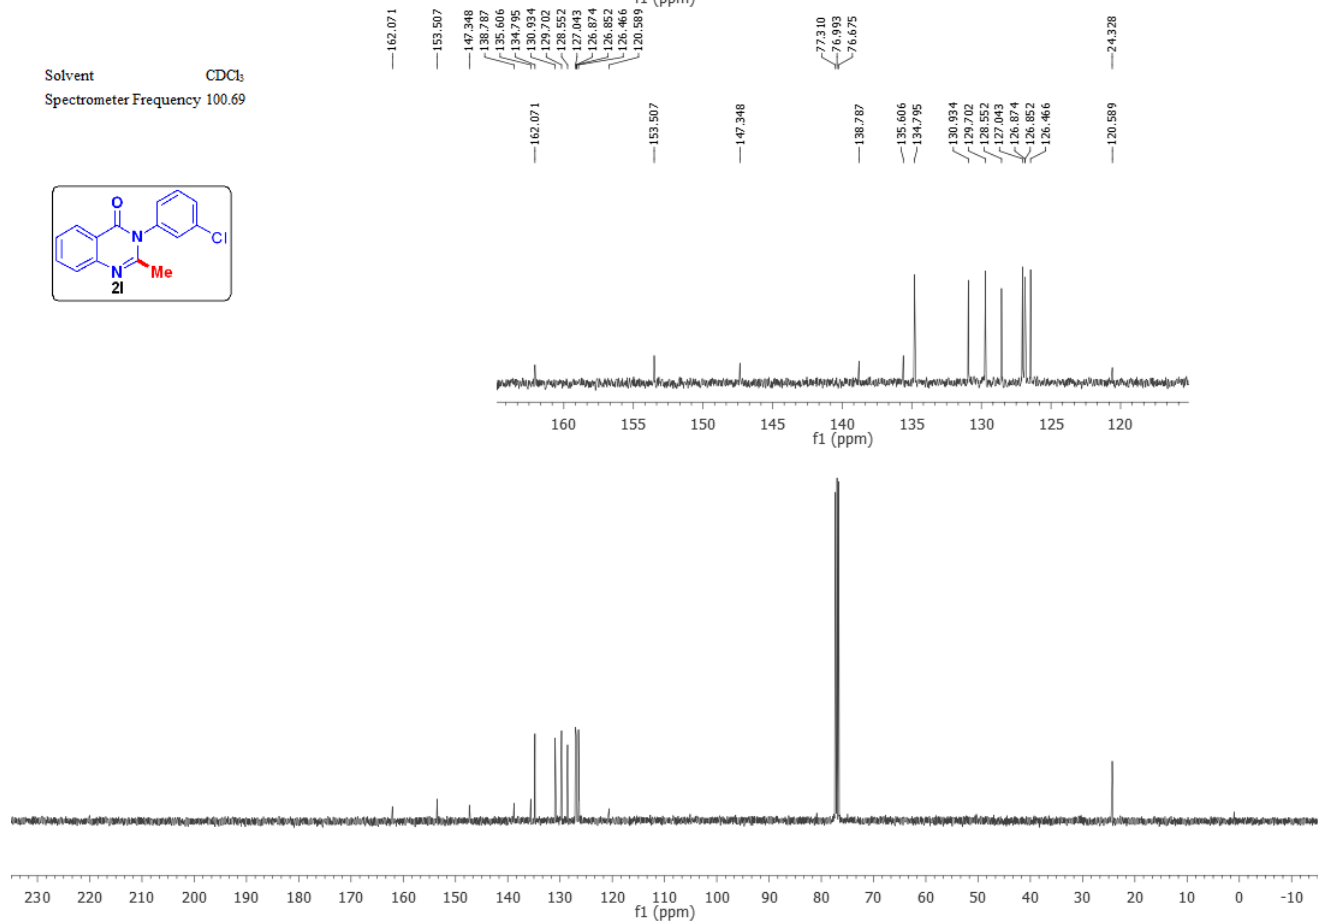

Solvent CDCl<sub>3</sub>  
Spectrometer Frequency 400.40

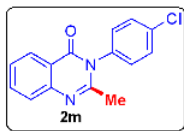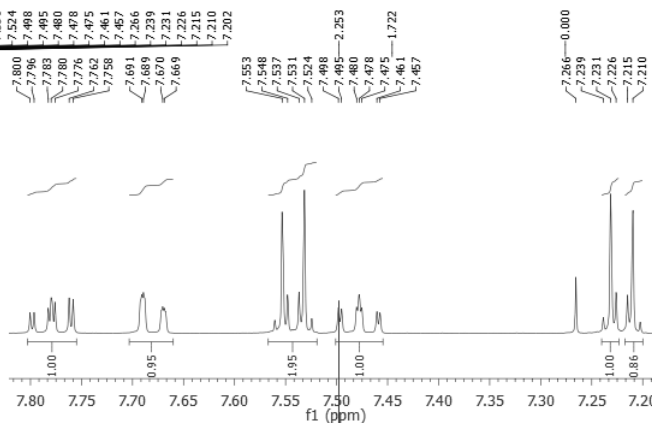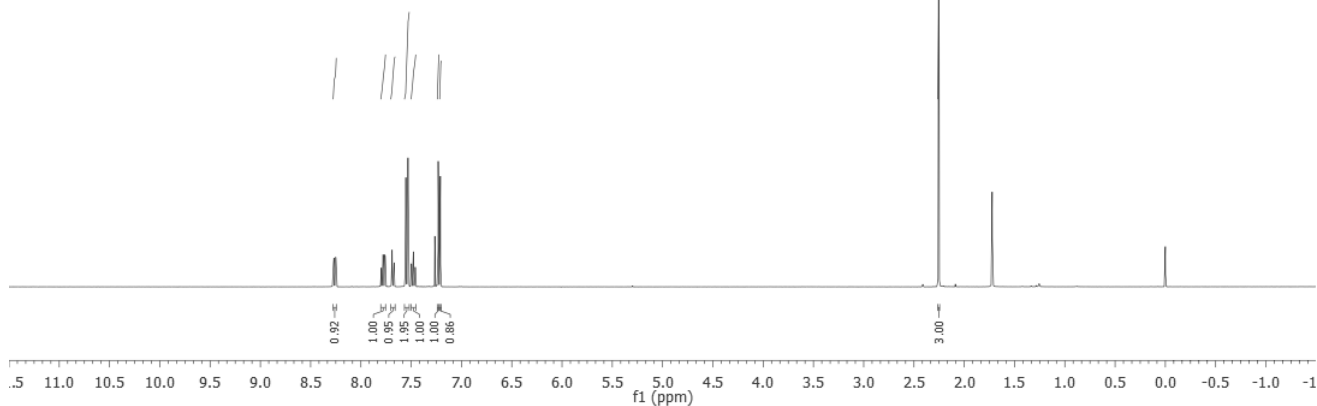

Solvent CDCl<sub>3</sub>  
Spectrometer Frequency 100.69

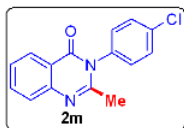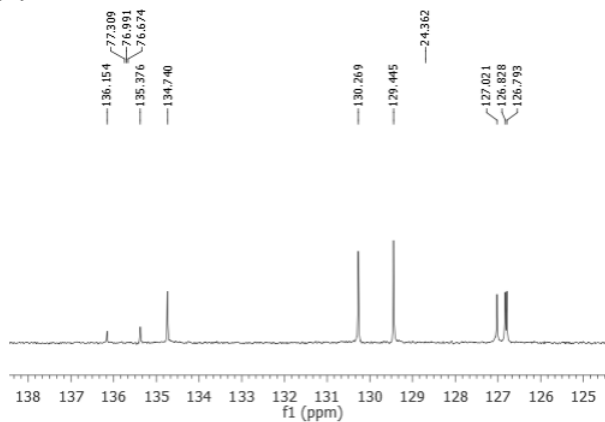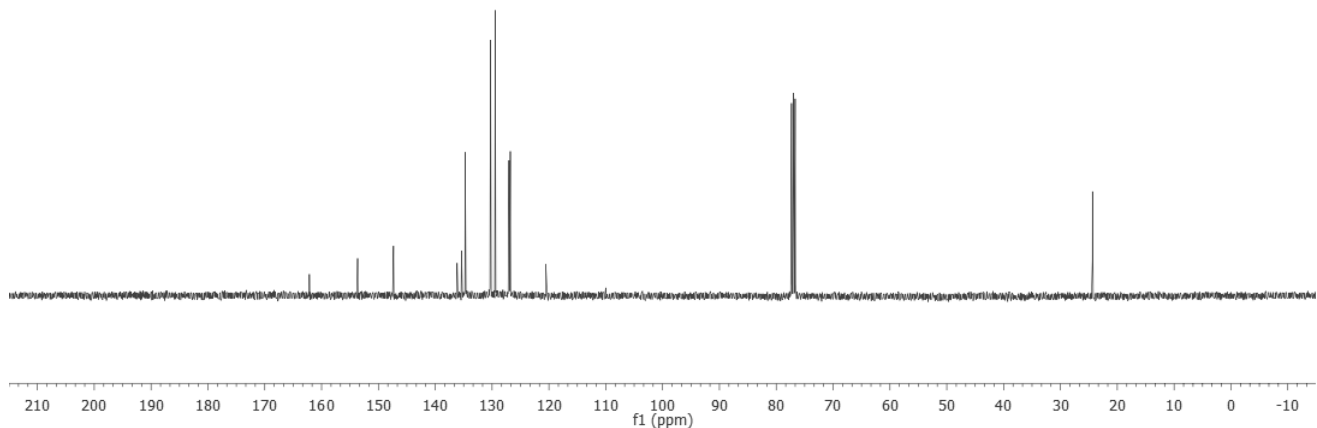

Solvent CDCl<sub>3</sub>  
Spectrometer Frequency 400.40

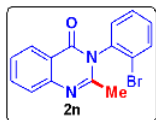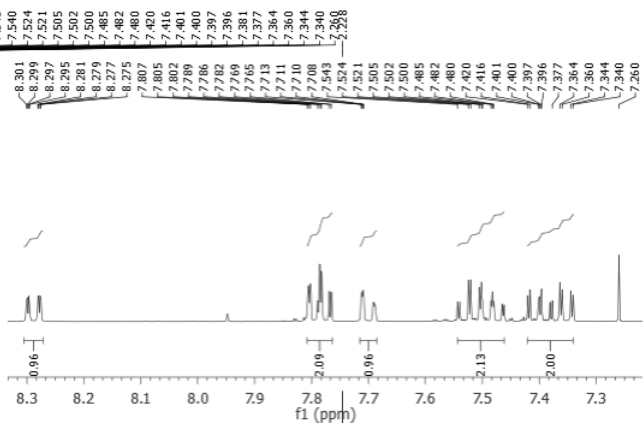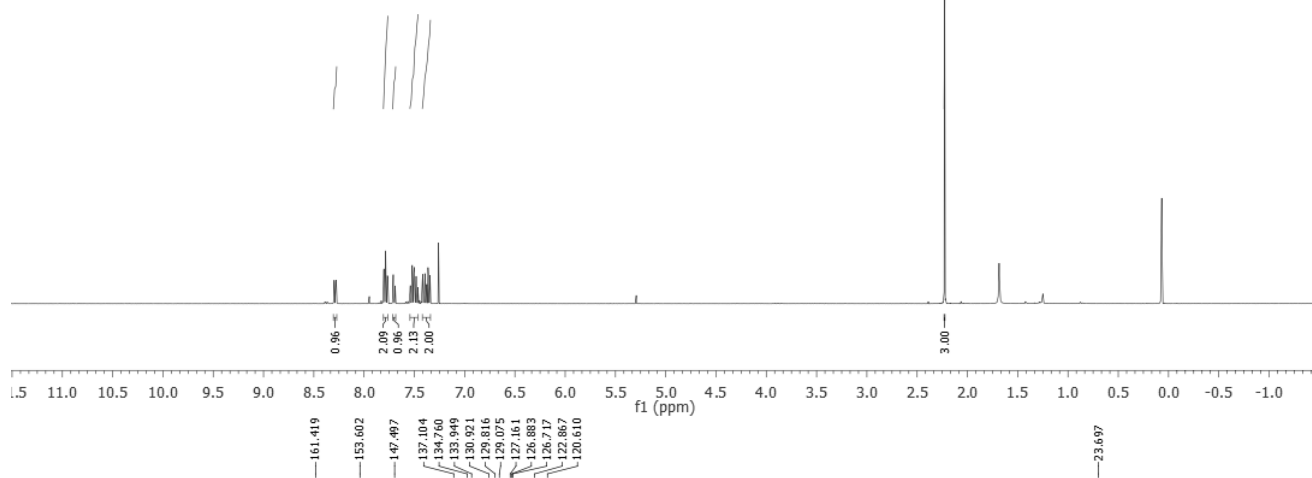

Solvent CDCl<sub>3</sub>  
Spectrometer Frequency 100.69

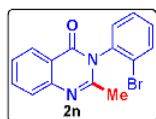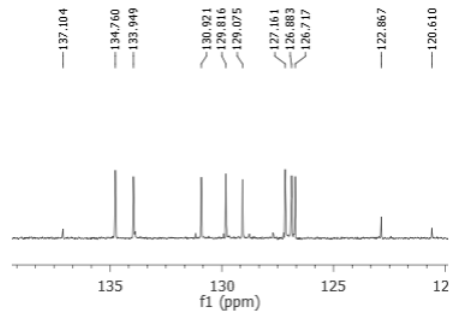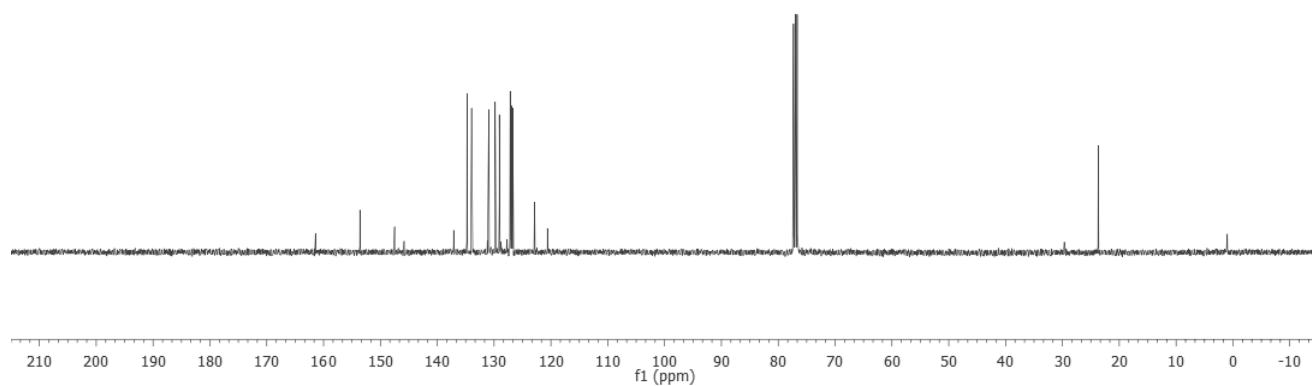

Solvent CDCl<sub>3</sub>  
Spectrometer Frequency 400.40

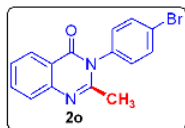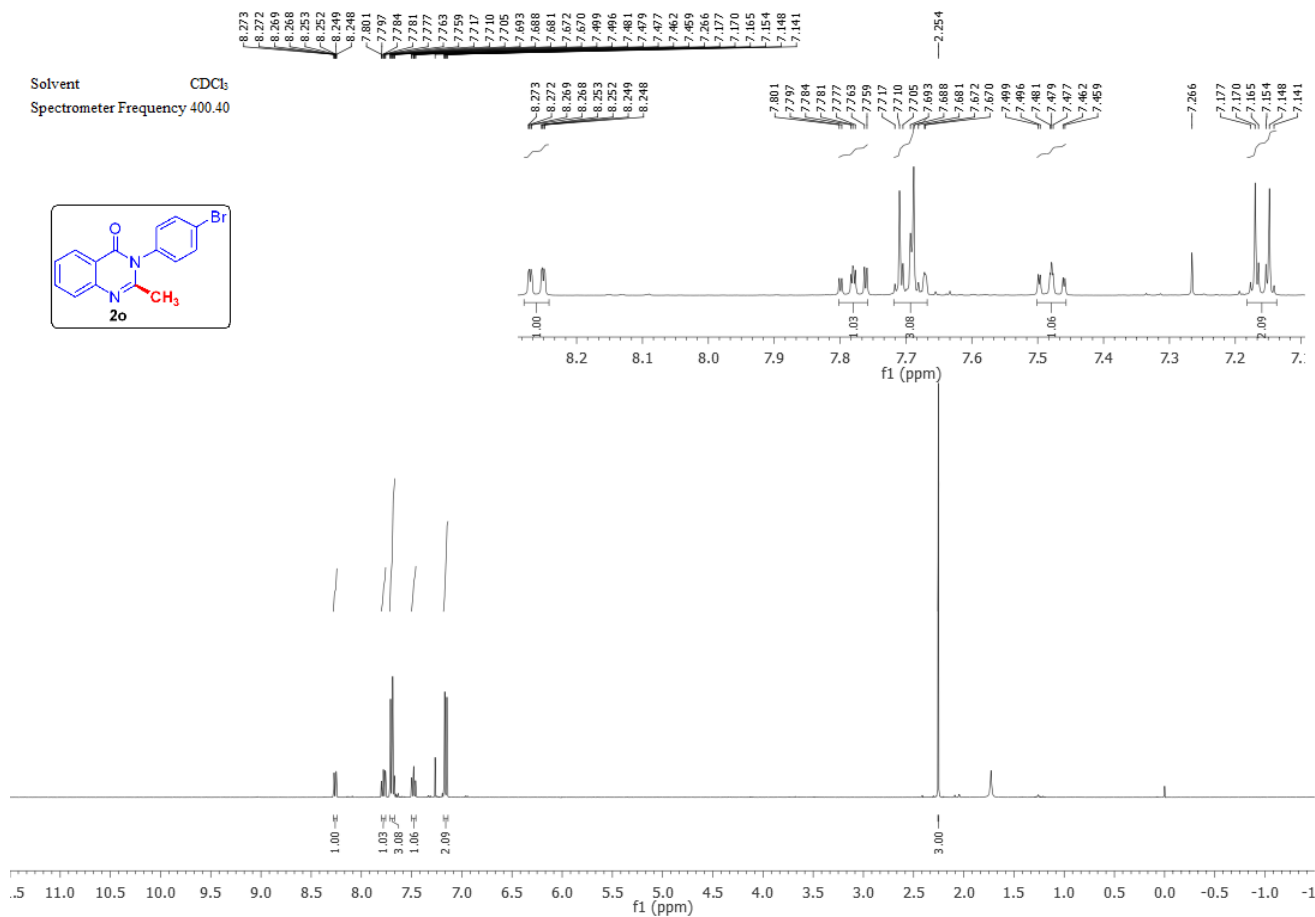

Solvent CDCl<sub>3</sub>  
Spectrometer Frequency 100.69

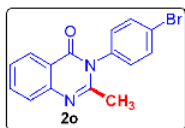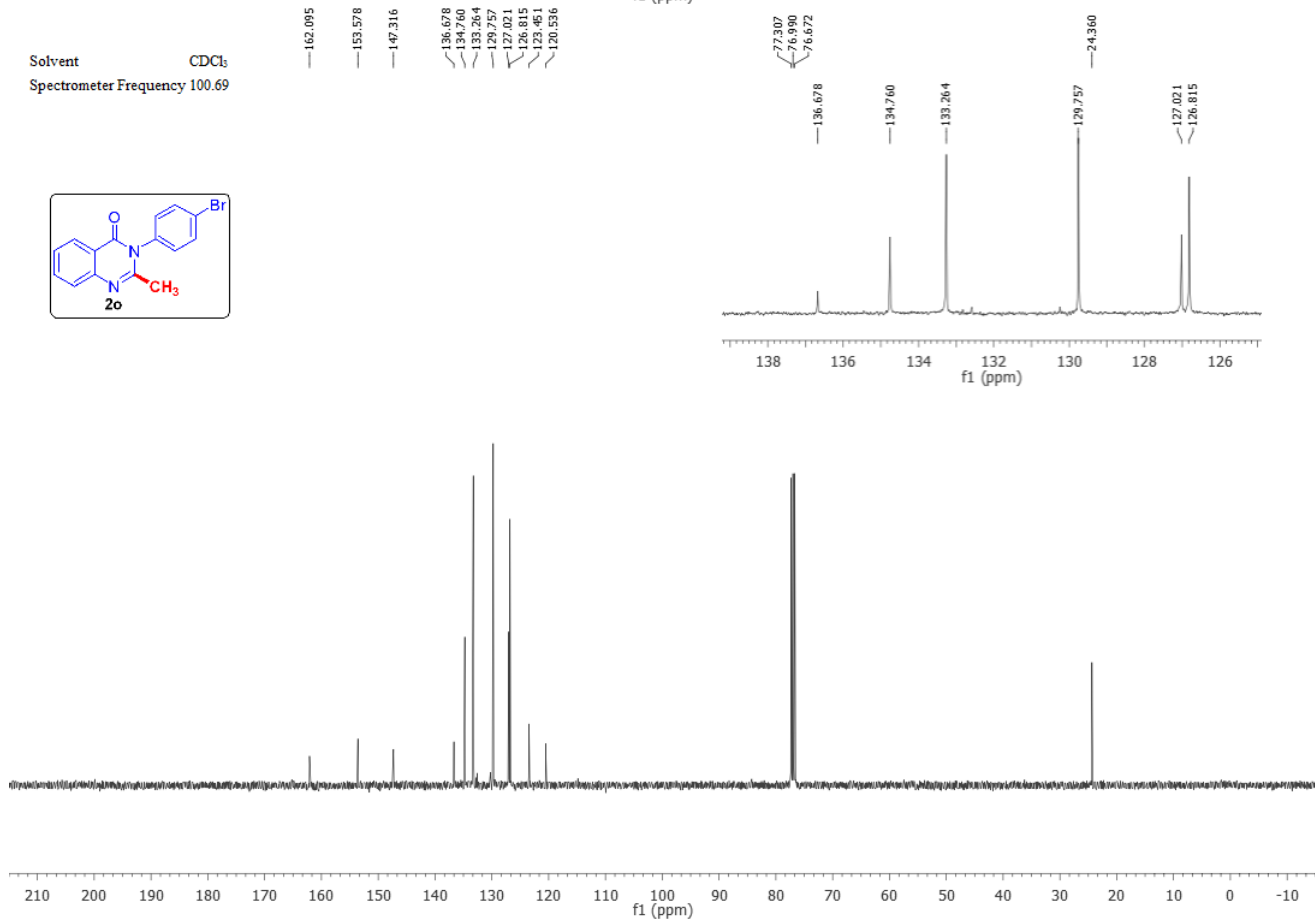

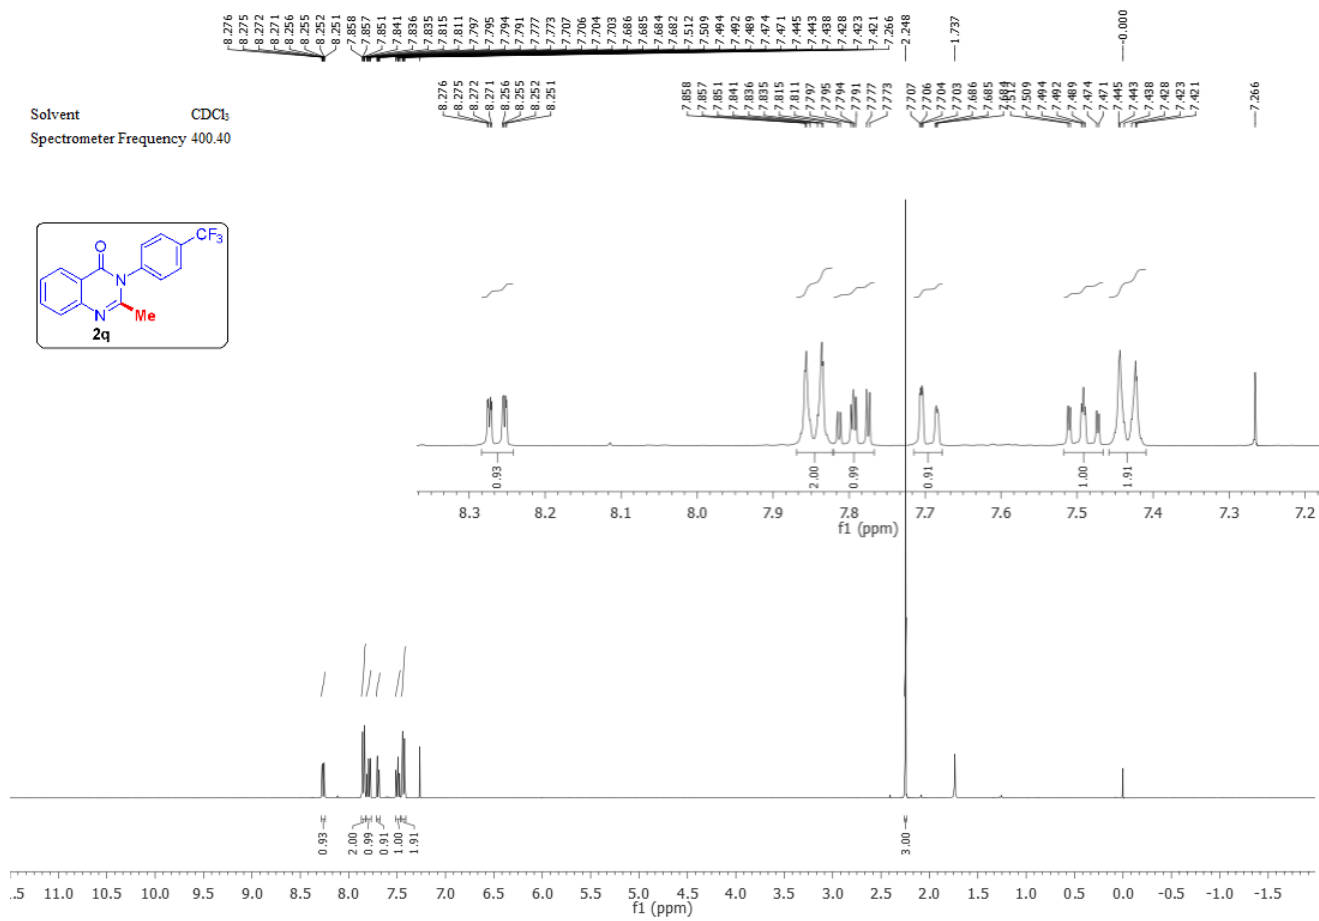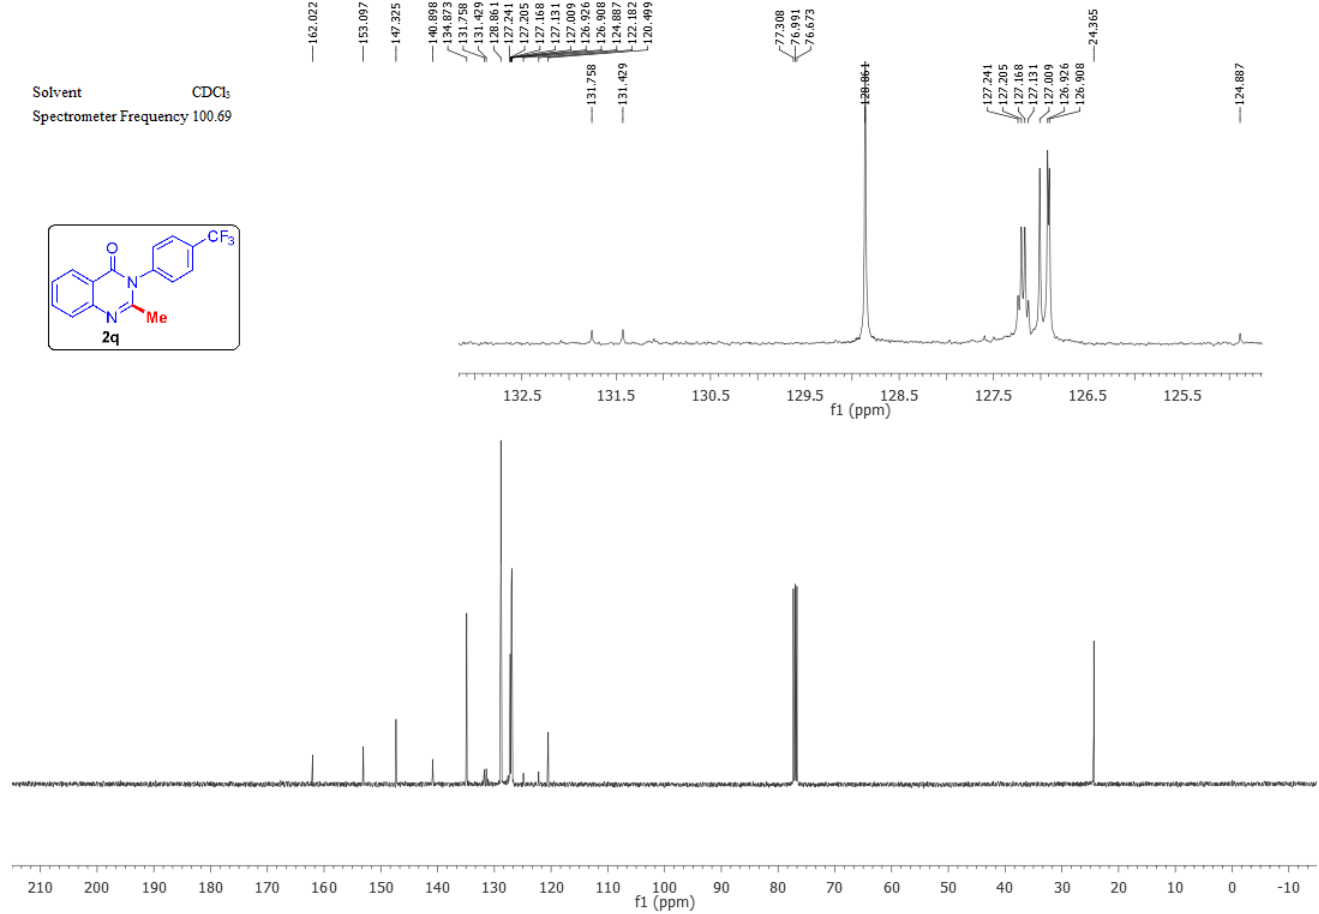

Solvent  $CDCl_3$   
Spectrometer Frequency 400.40

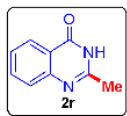

8.311, 8.311, 8.308, 8.292, 8.291, 8.288, 7.791, 7.788, 7.784, 7.770, 7.766, 7.760, 7.708, 7.689, 7.506, 7.490, 7.488, 7.486, 7.471, 7.468, 7.283, 7.791, 7.788, 7.784, 7.760, 7.710, 7.708, 7.689, 7.506, 7.490, 7.488, 7.471, 7.468

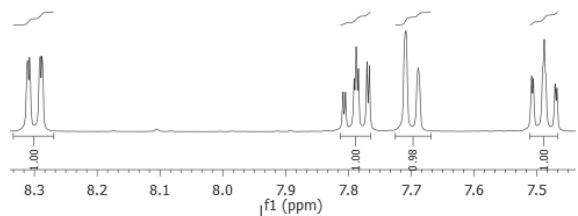

0.72

Solvent  $CDCl_3$   
Spectrometer Frequency 100.69

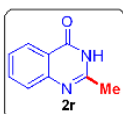

164.315, 153.347, 149.339, 134.887, 126.039, 126.175, 120.193, 77.310, 77.300, 76.875, 126.039, 126.404, 126.175

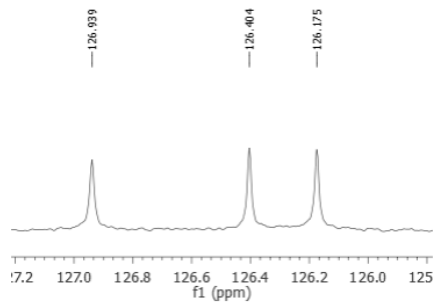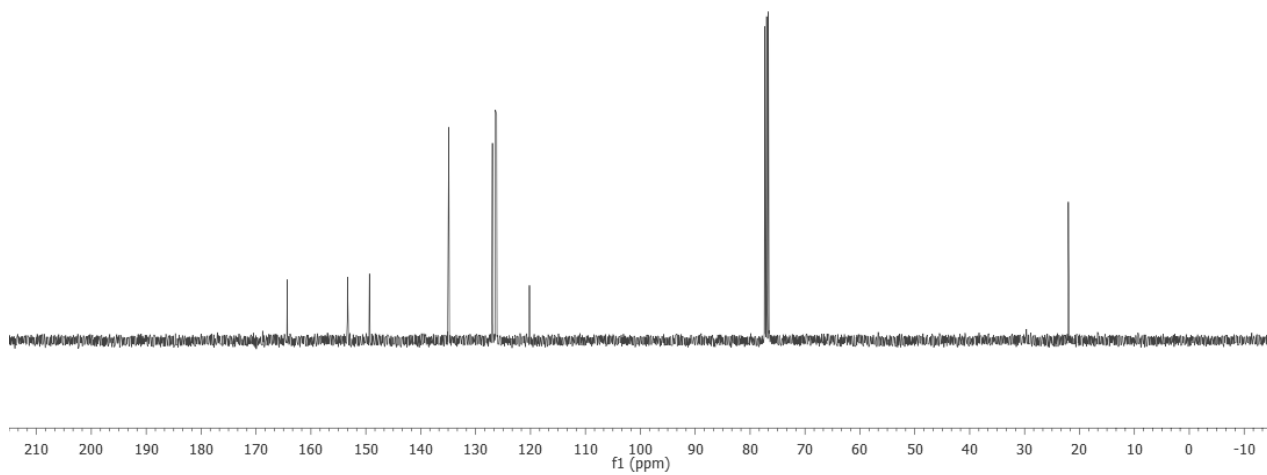

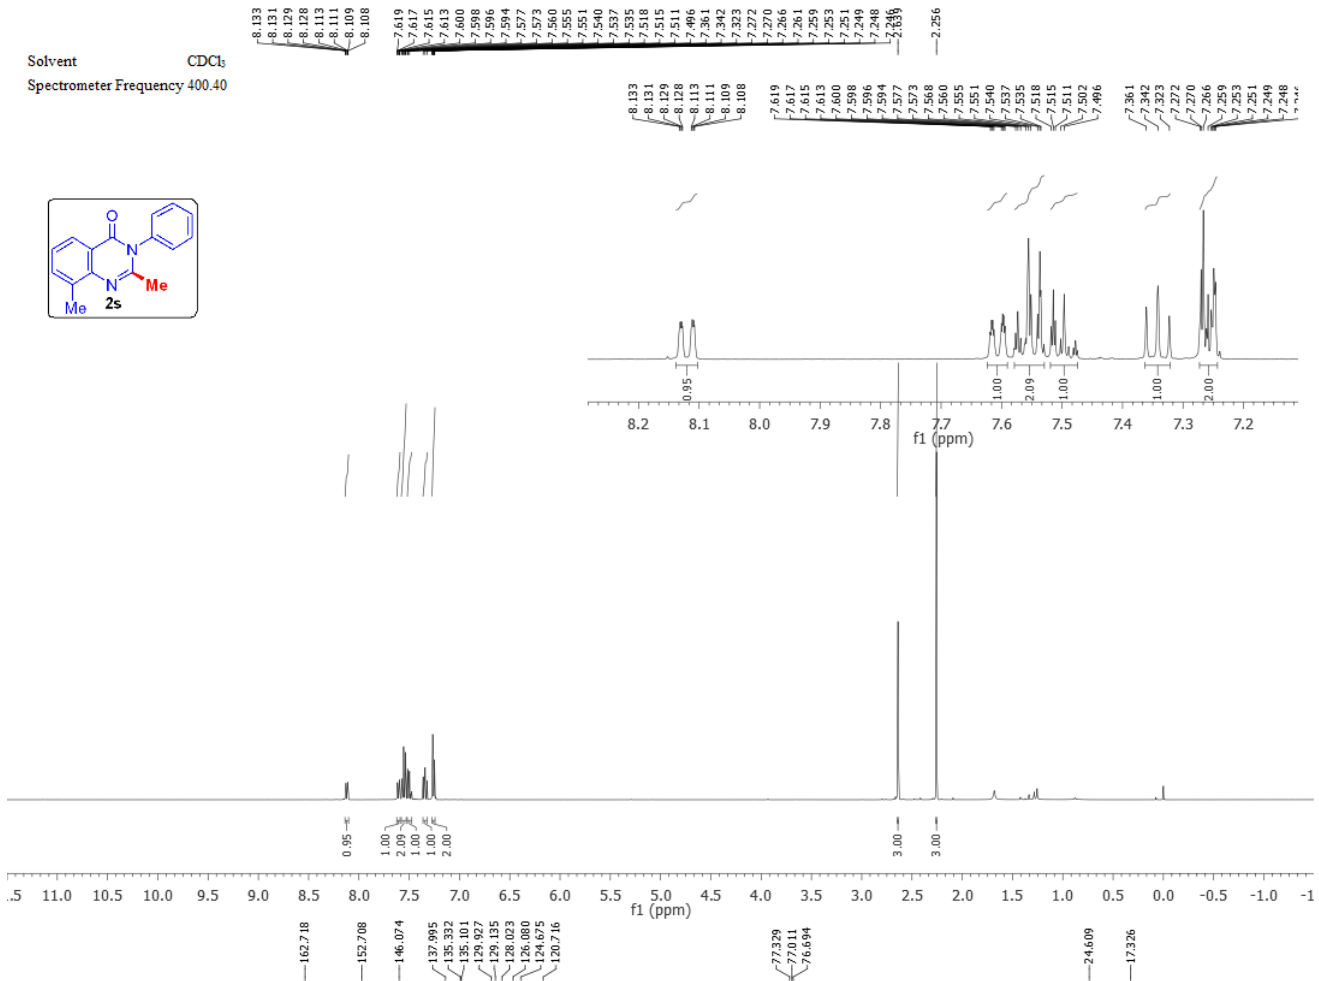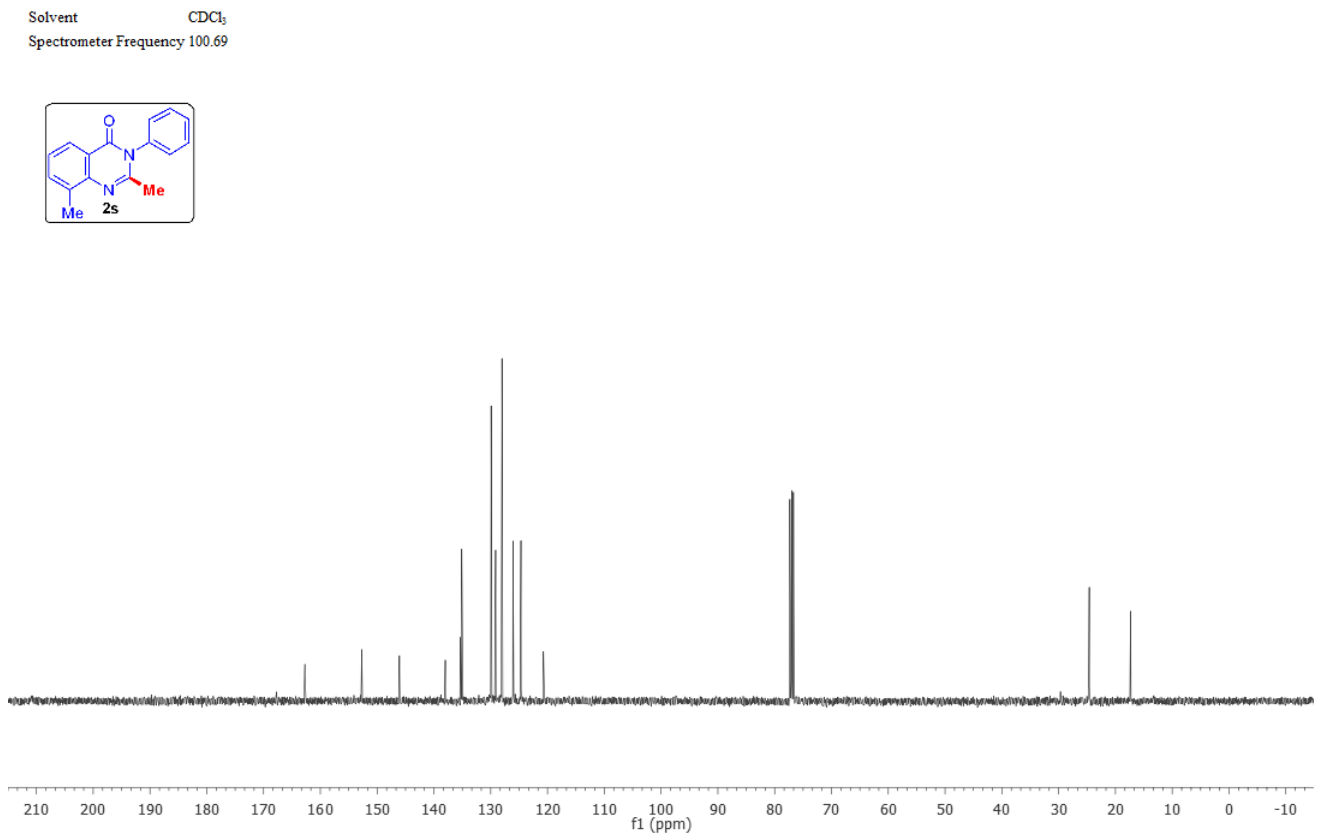





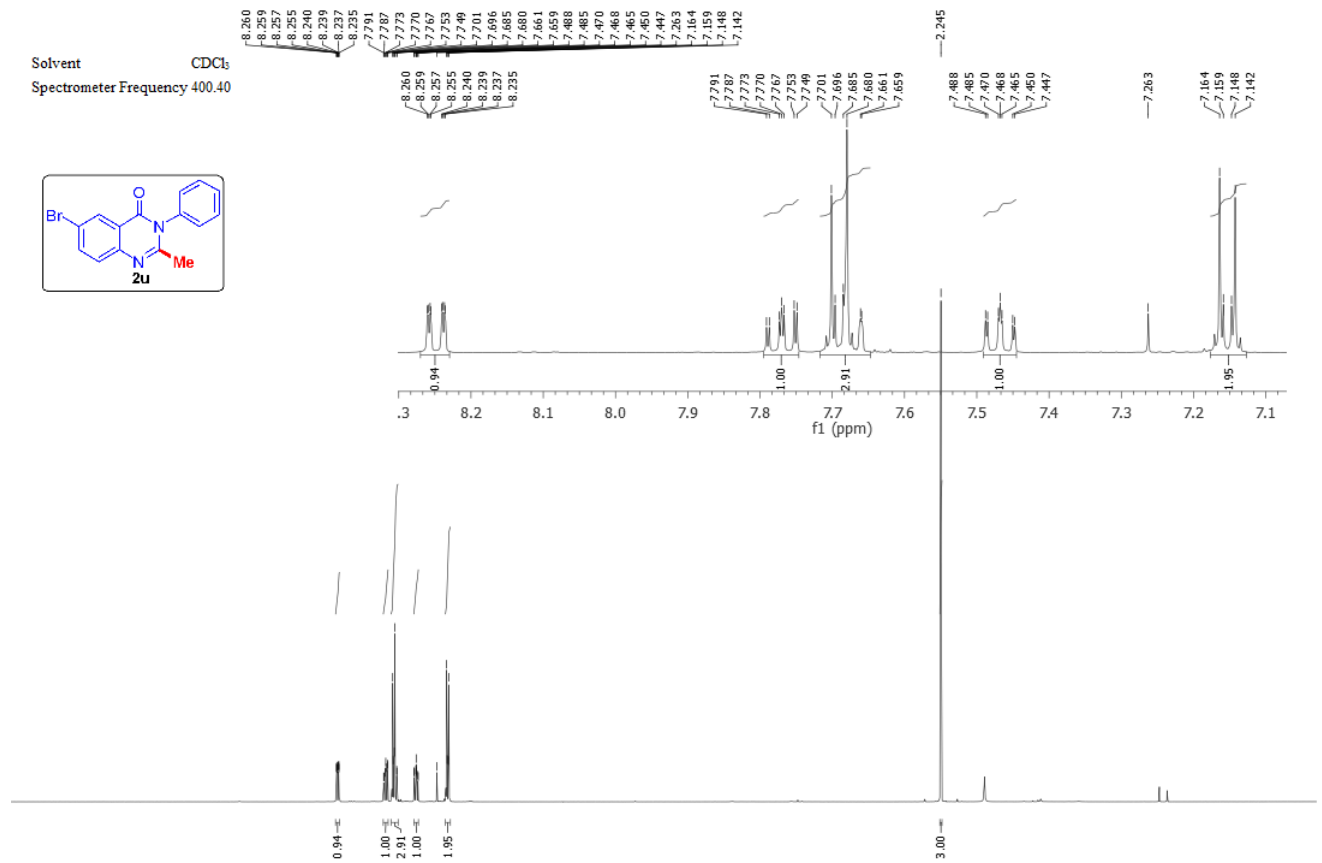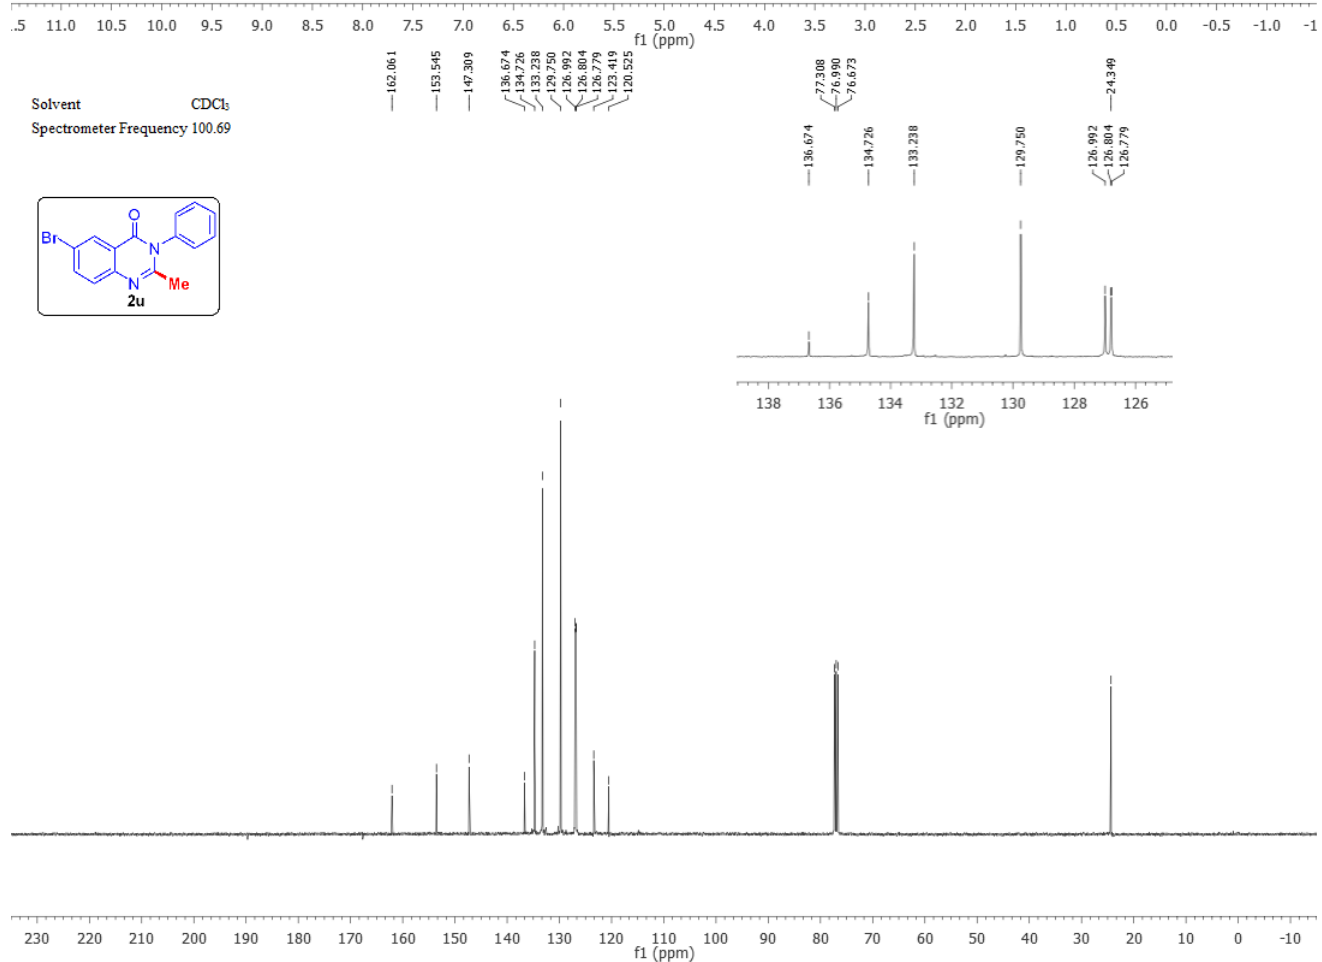

Solvent  $\text{CDCl}_3$   
Spectrometer Frequency 400.40

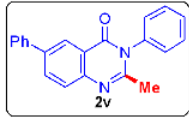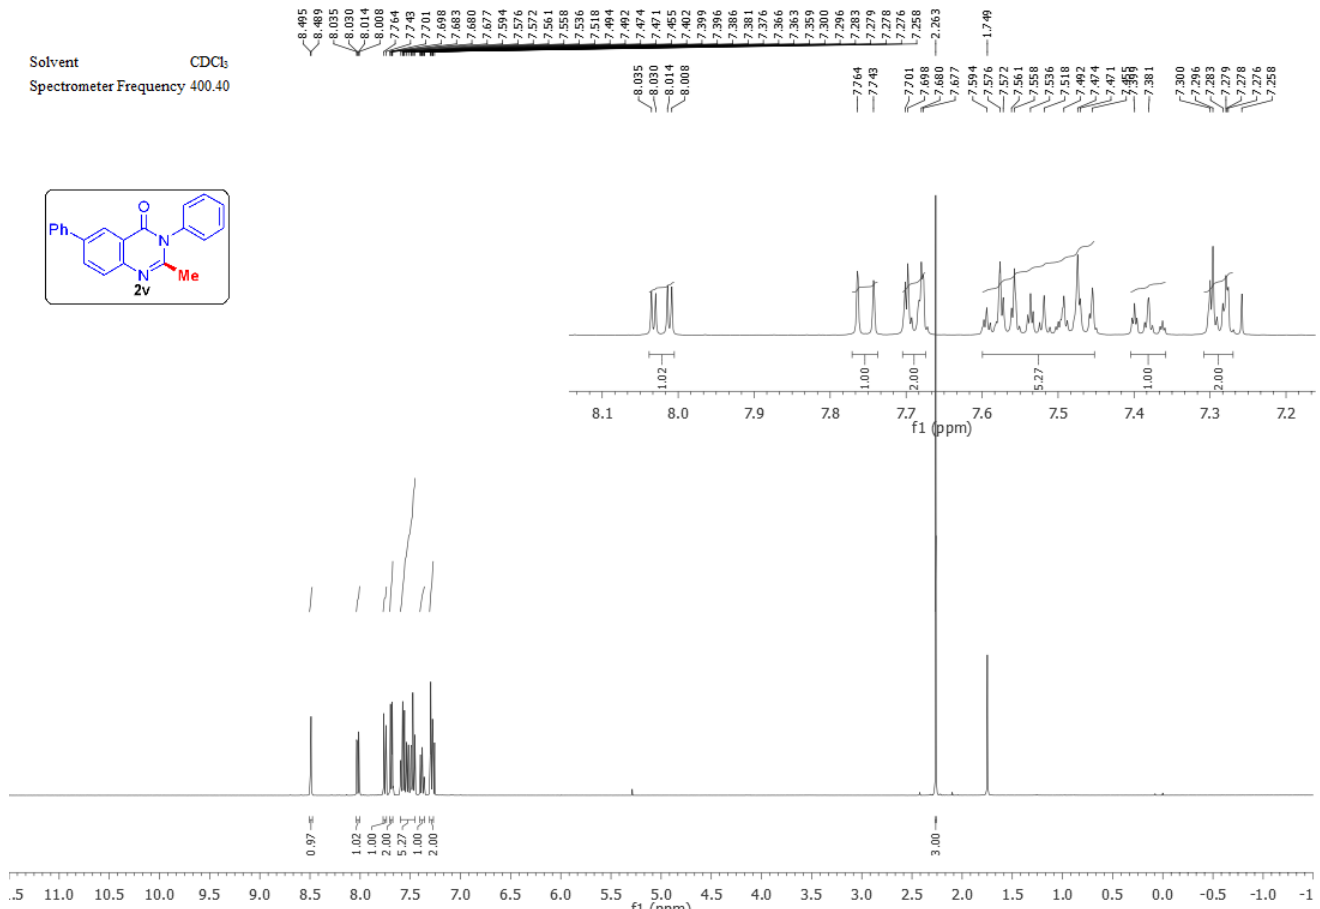

Solvent  $\text{CDCl}_3$   
Spectrometer Frequency 100.69

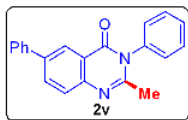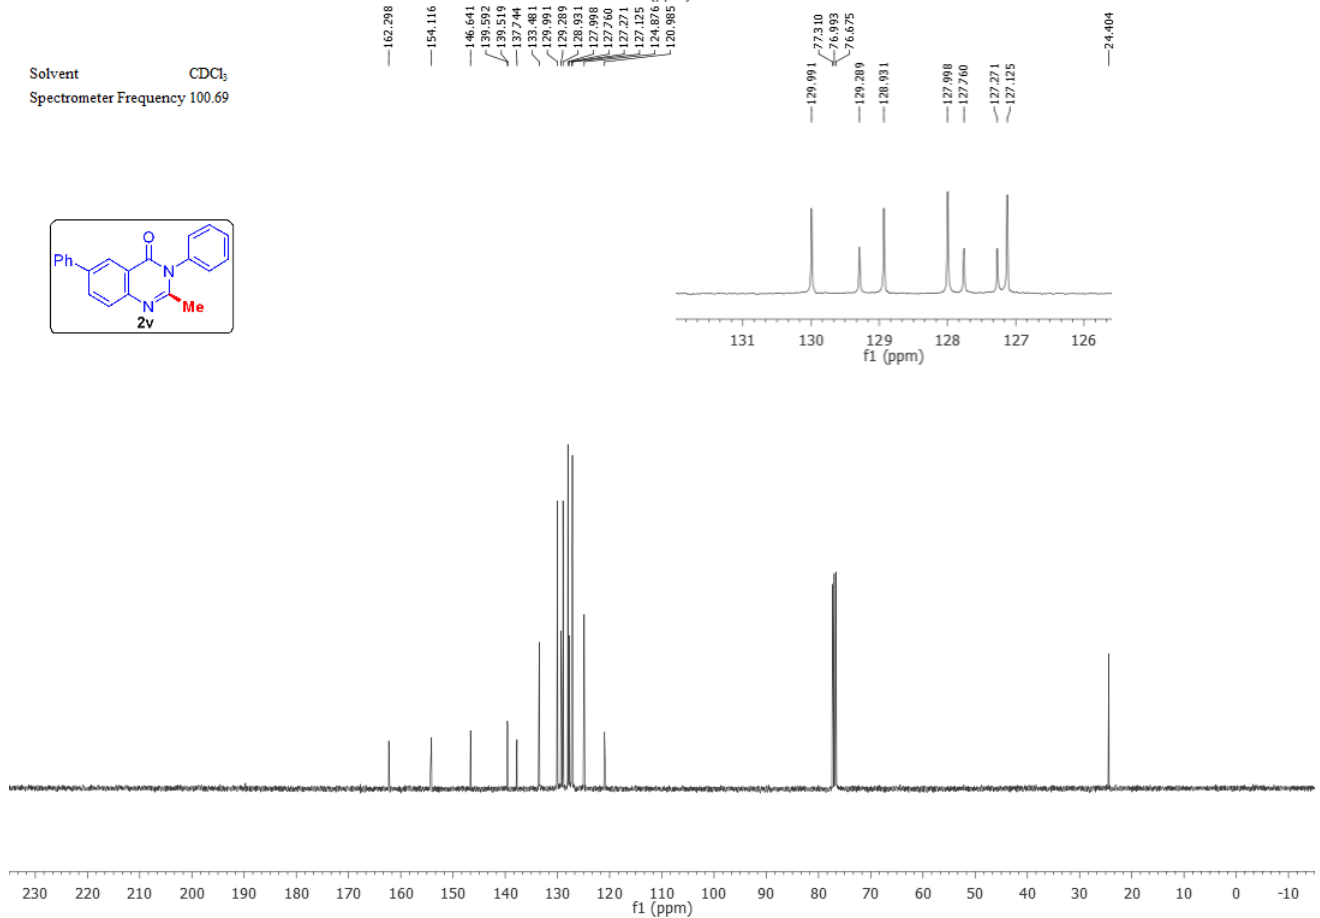

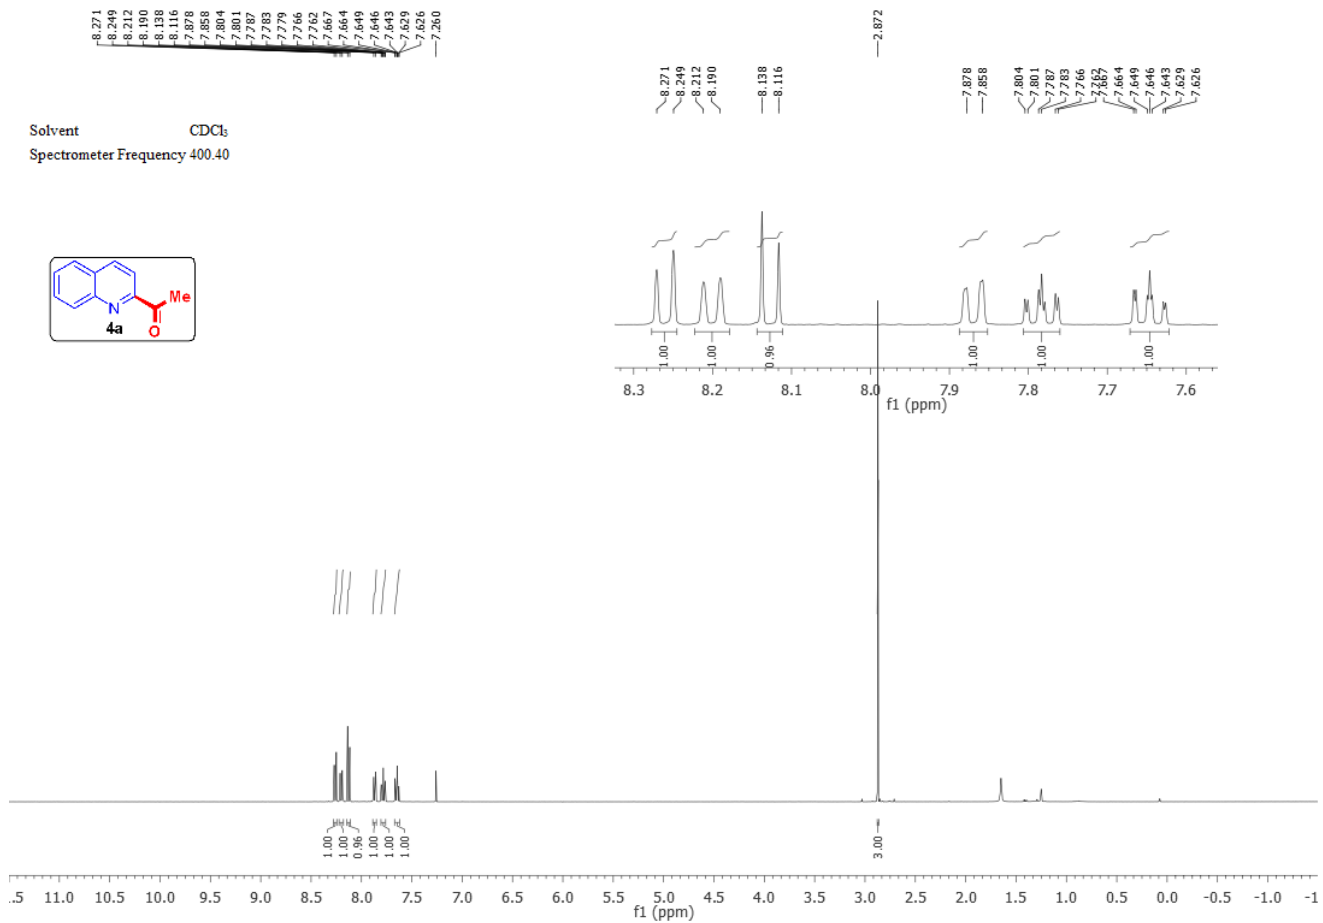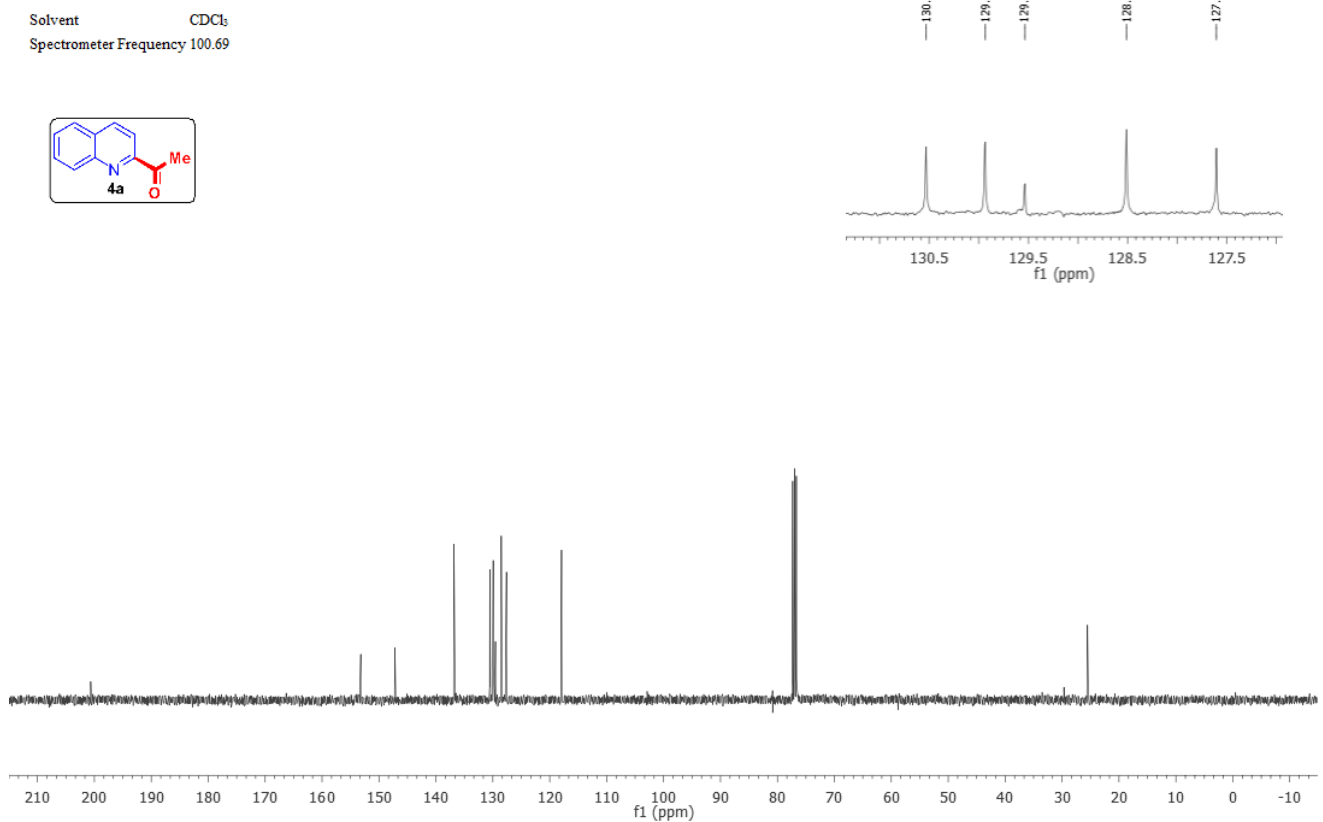

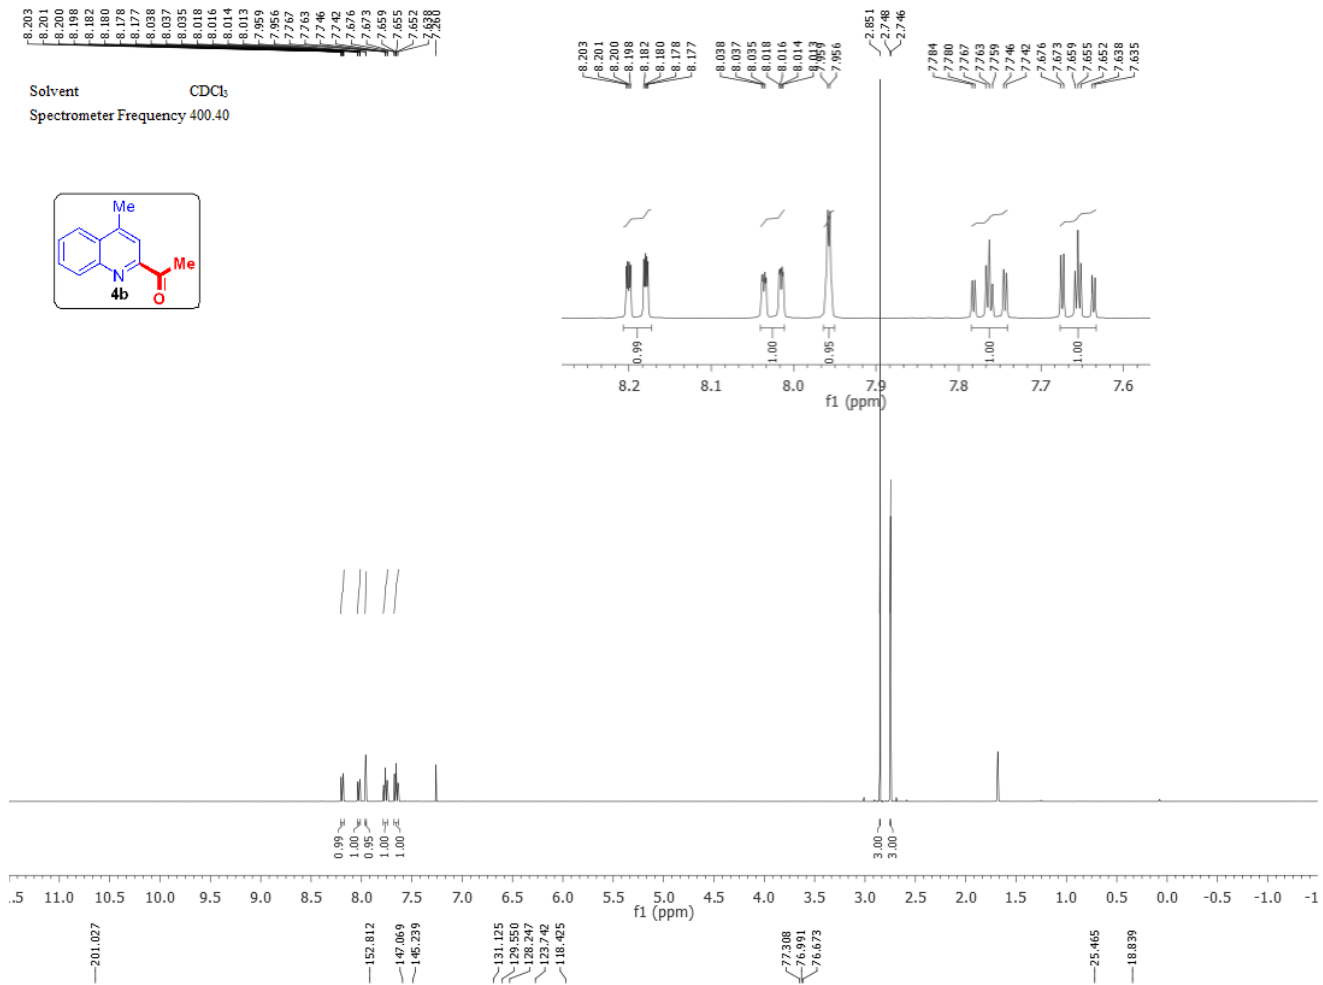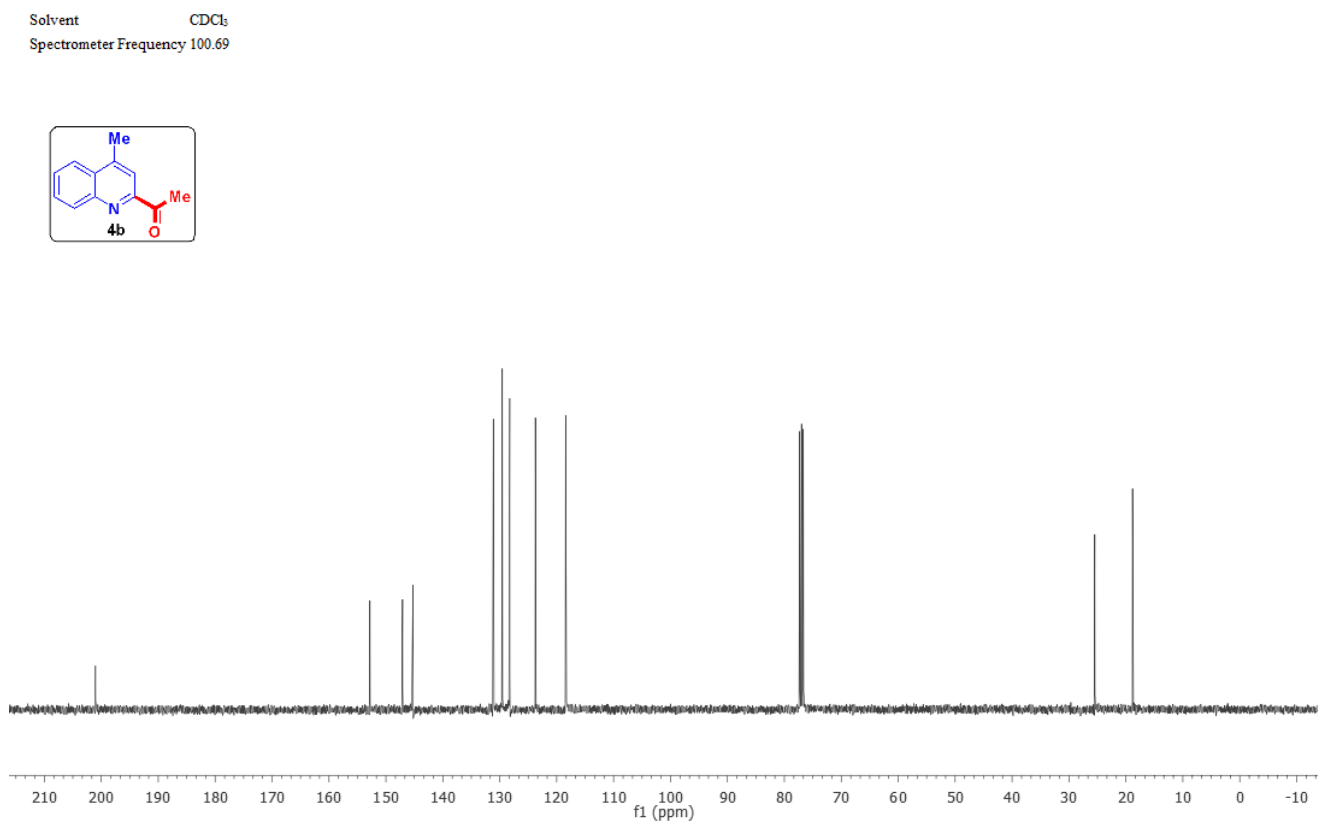

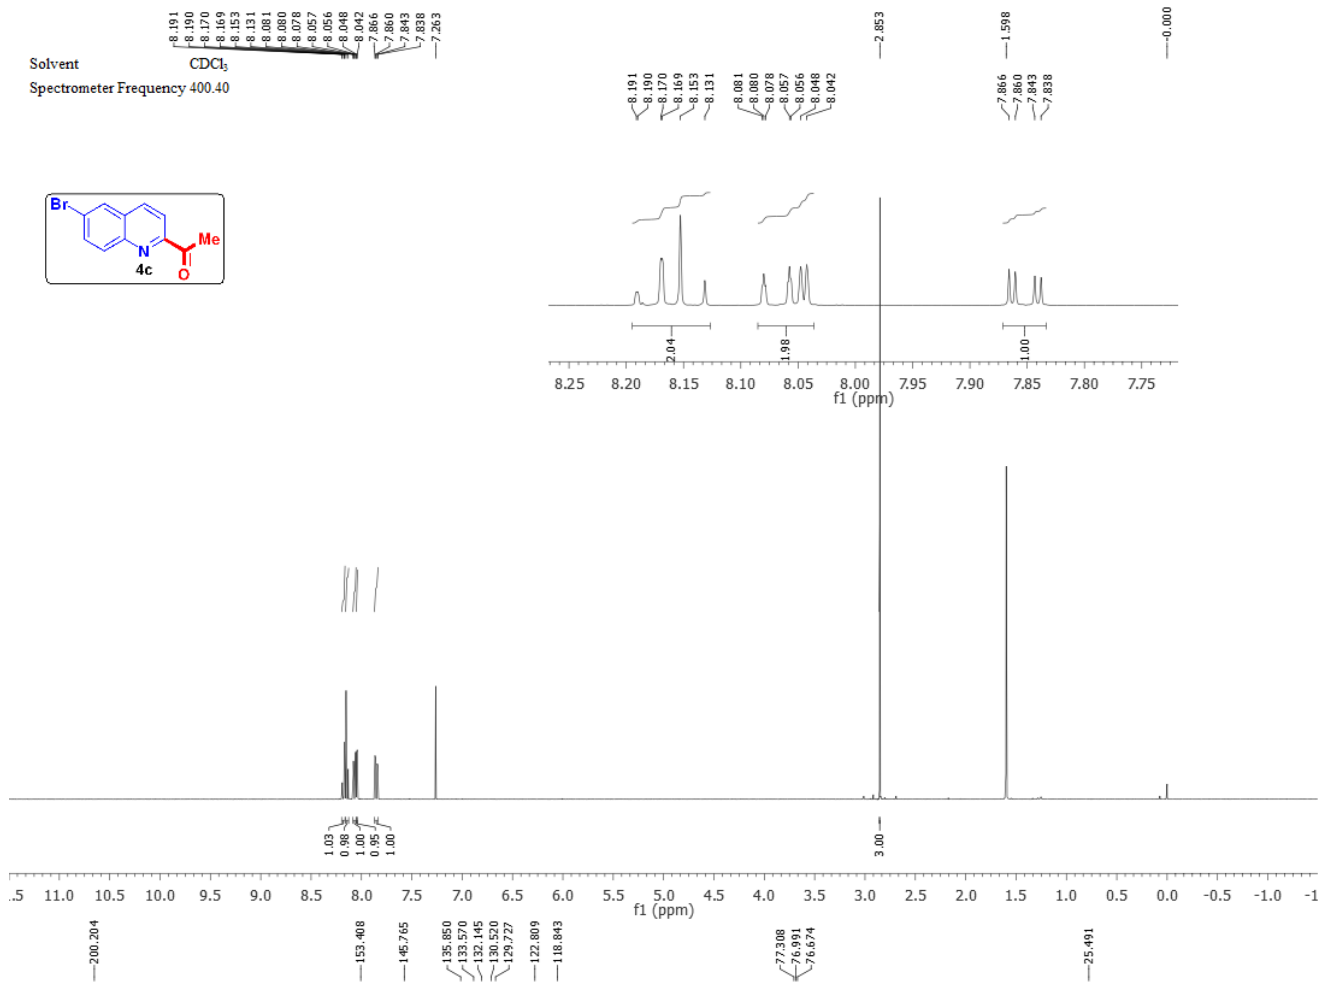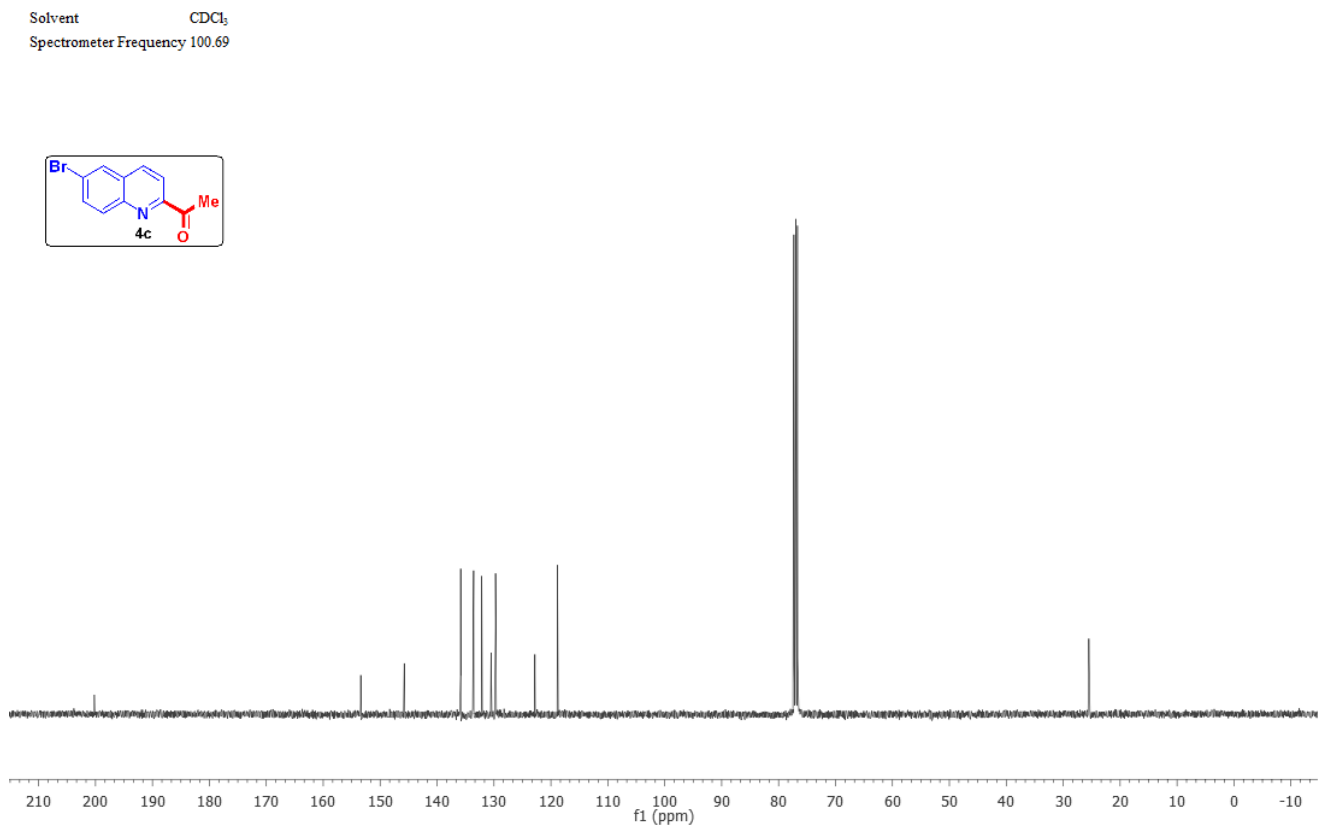

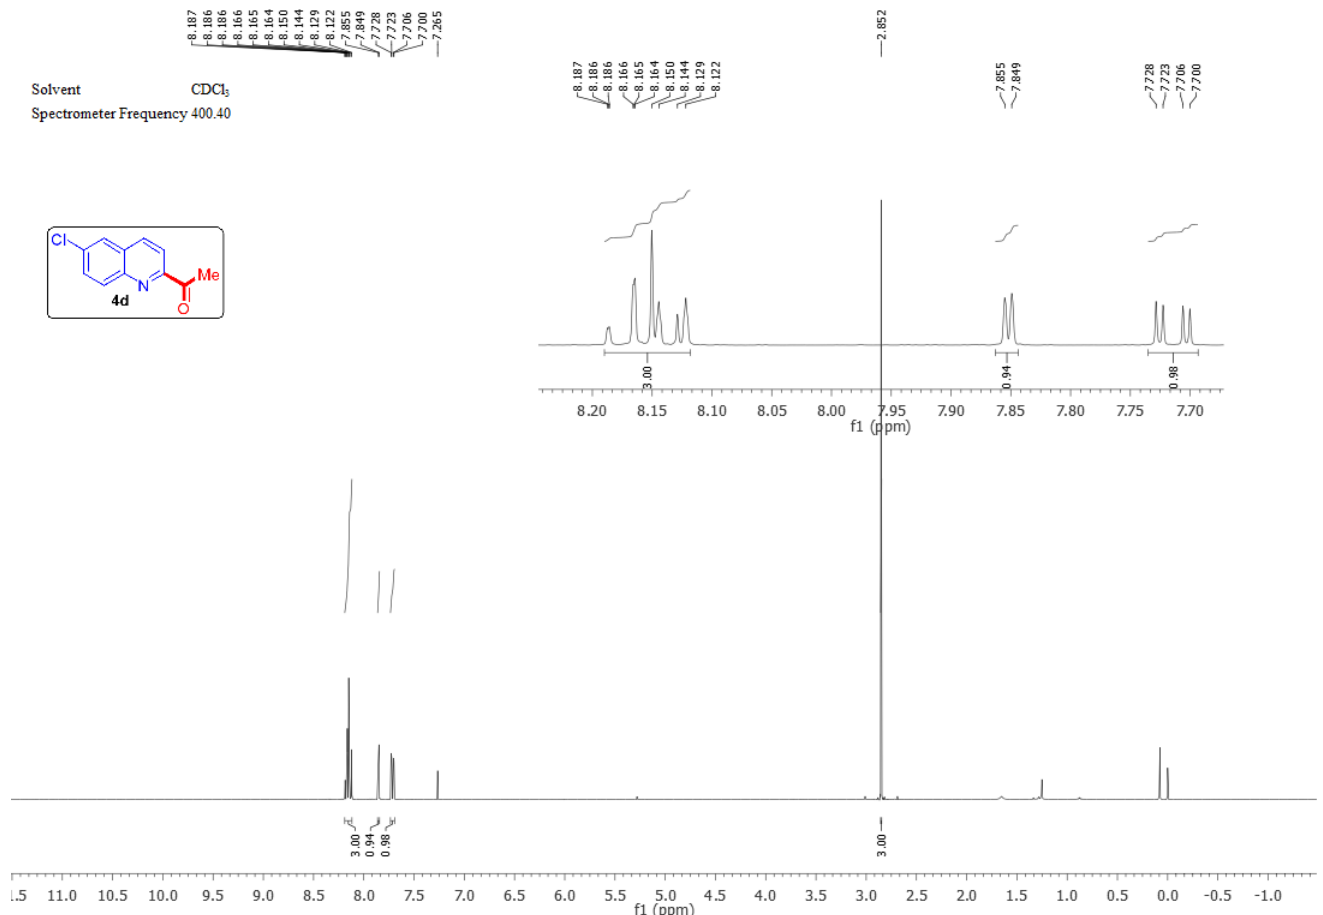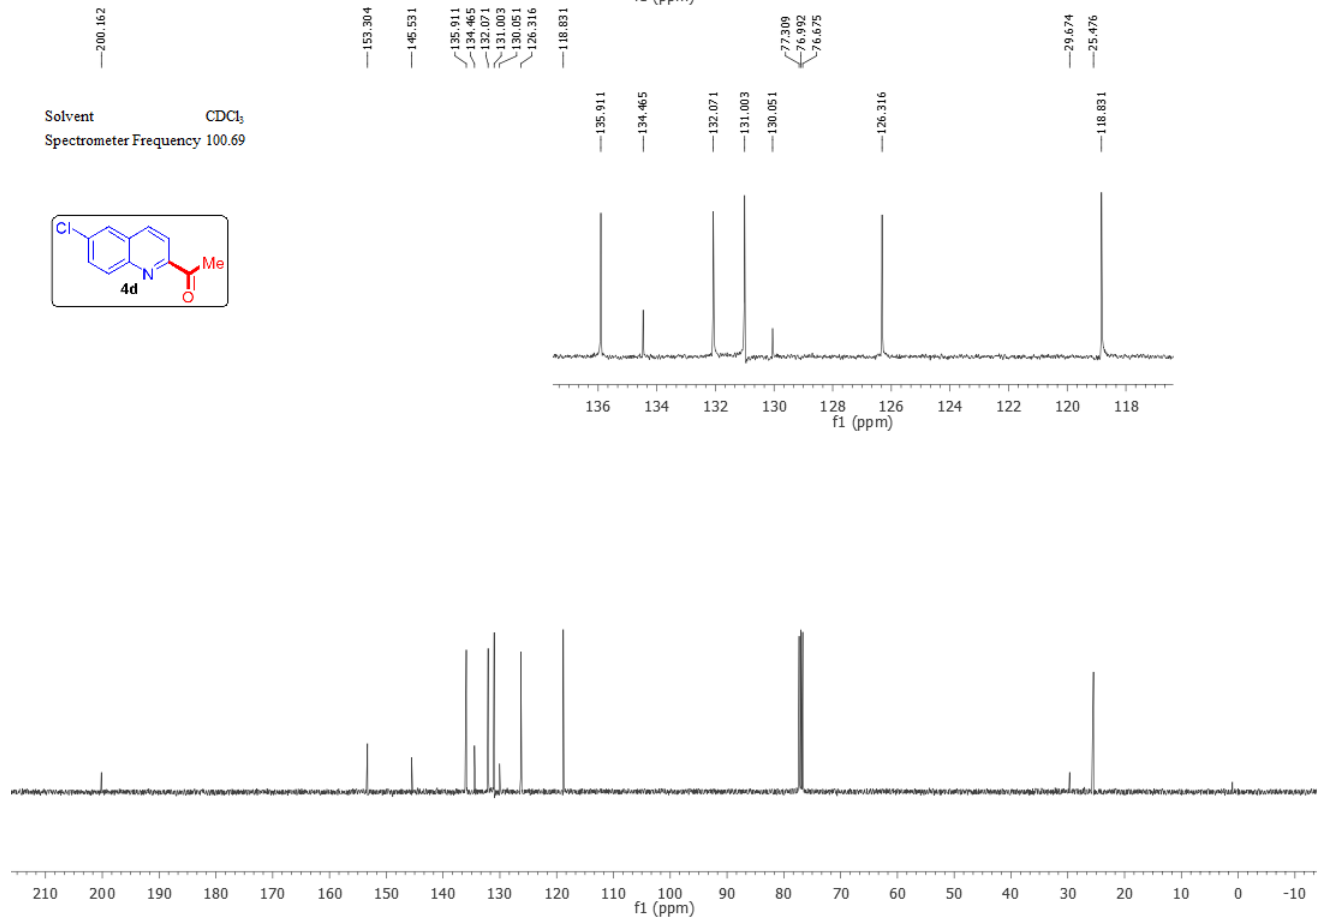

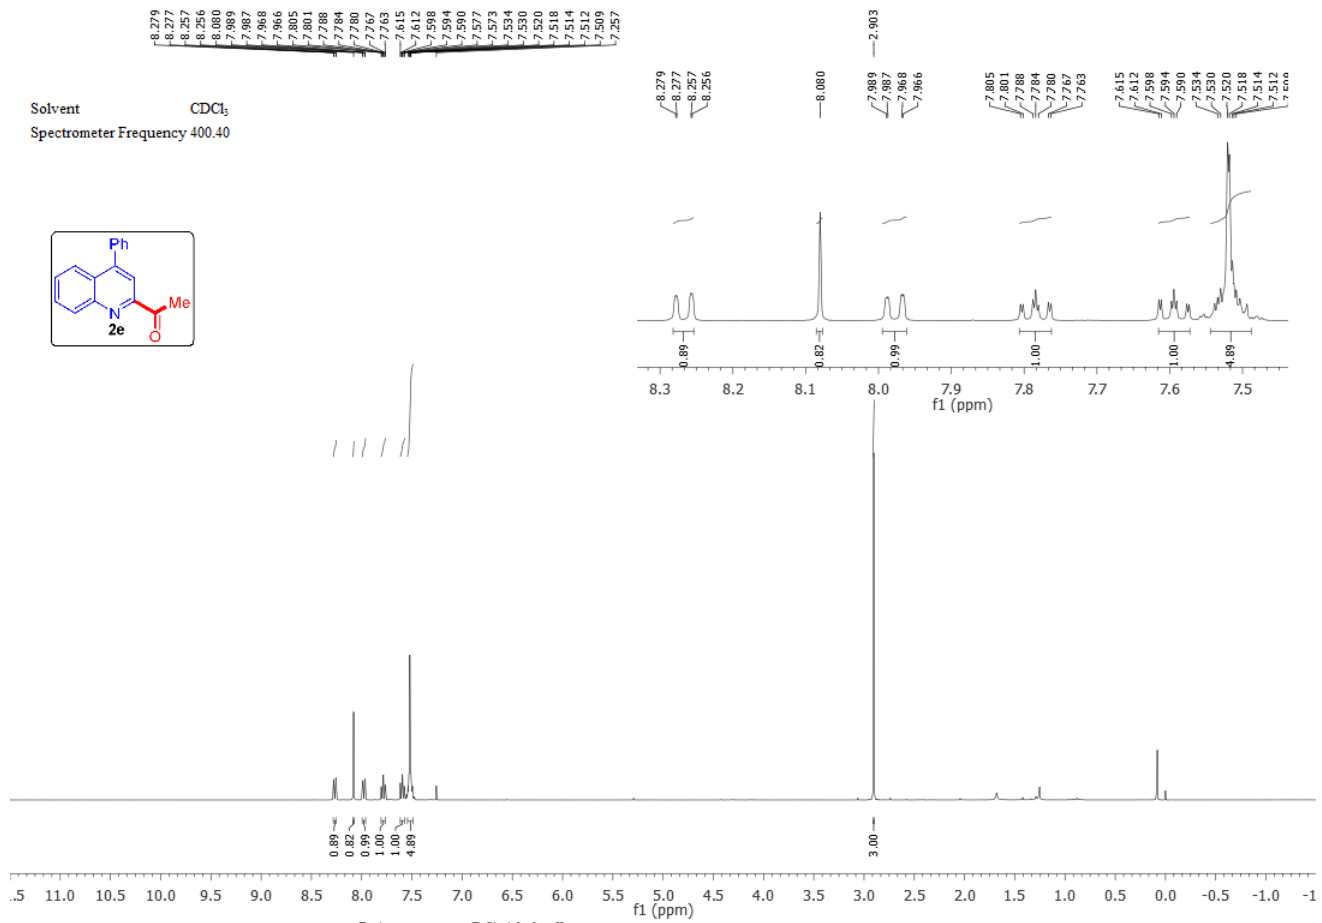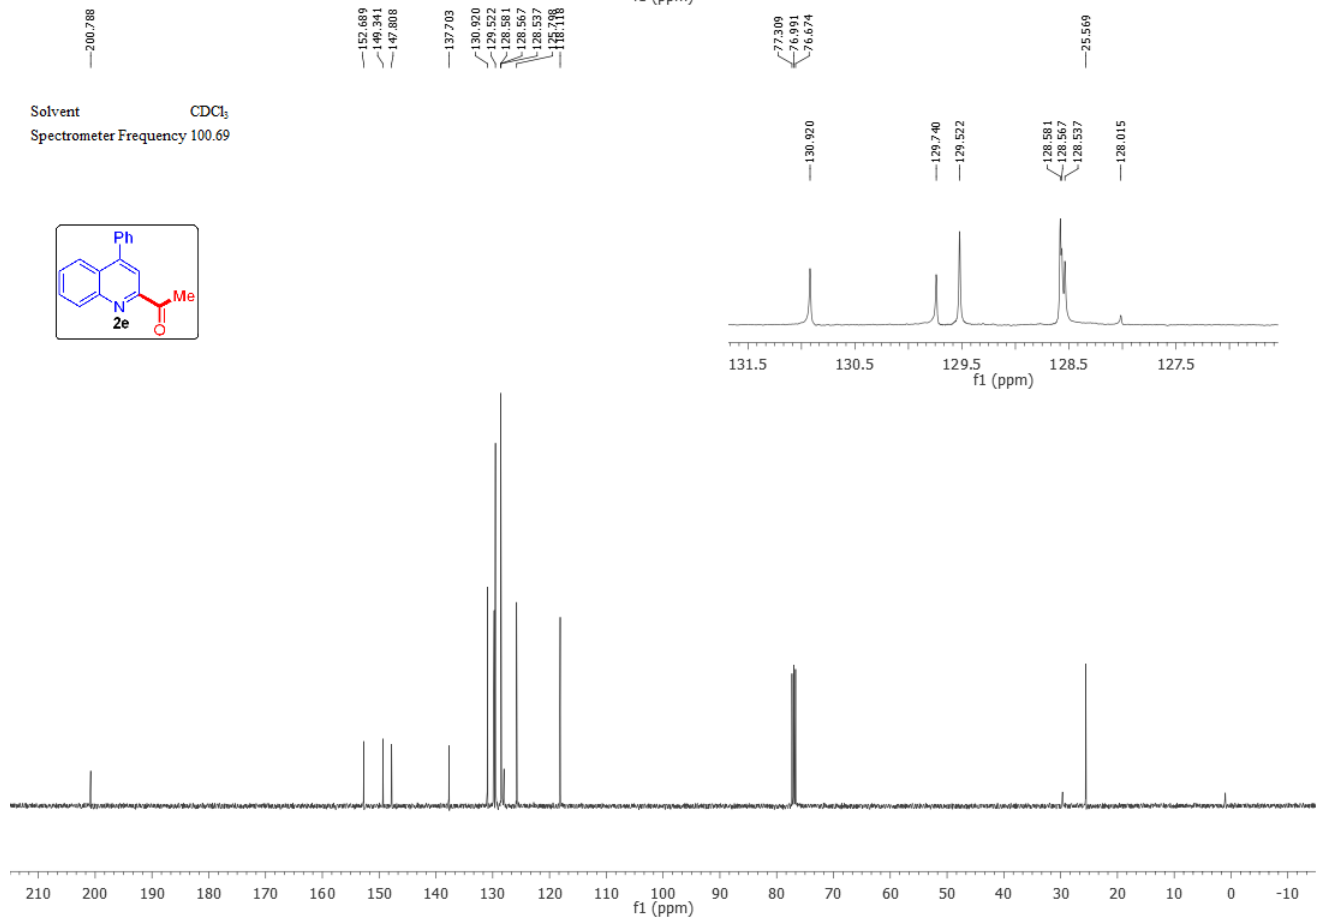



Solvent  $\text{CDCl}_3$   
Spectrometer Frequency 400.40

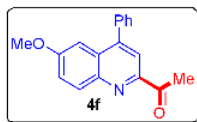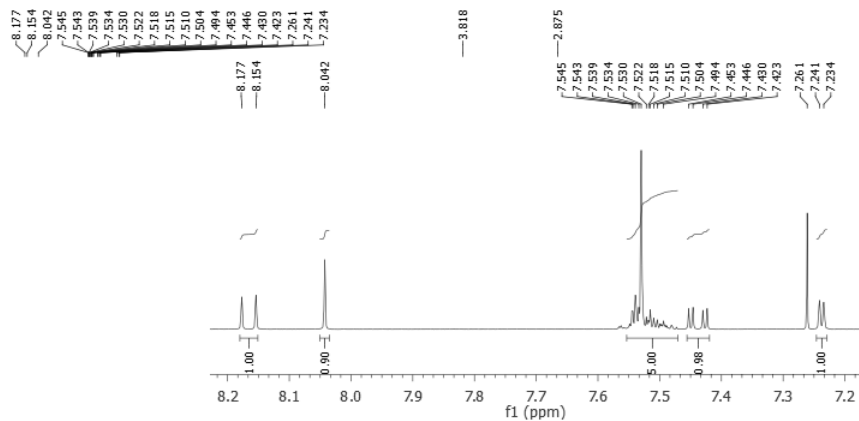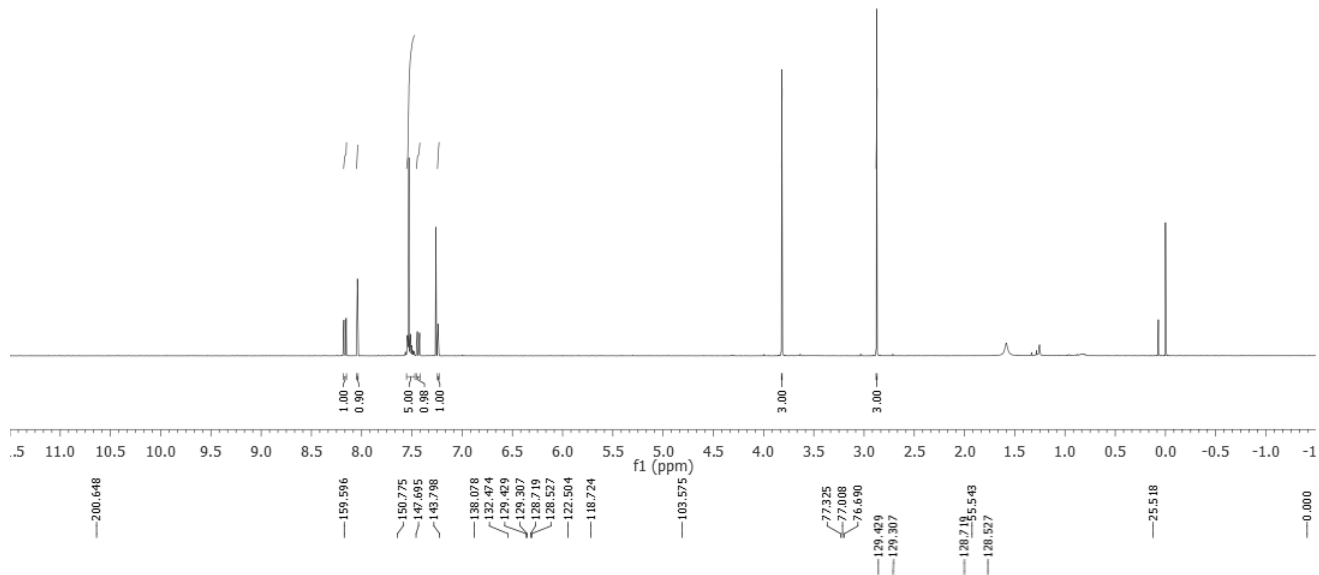

Solvent  $\text{CDCl}_3$   
Spectrometer Frequency 100.69

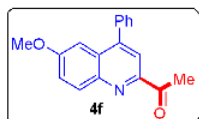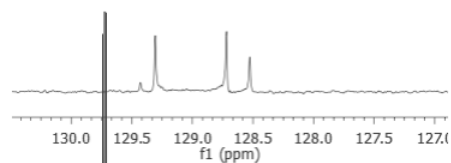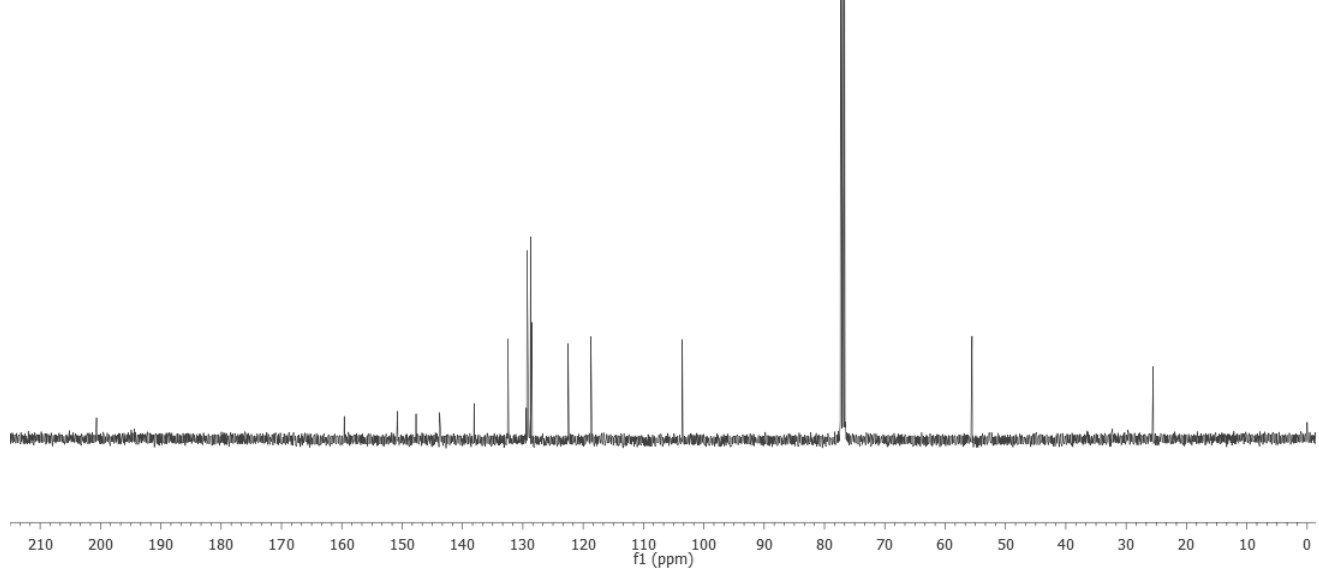

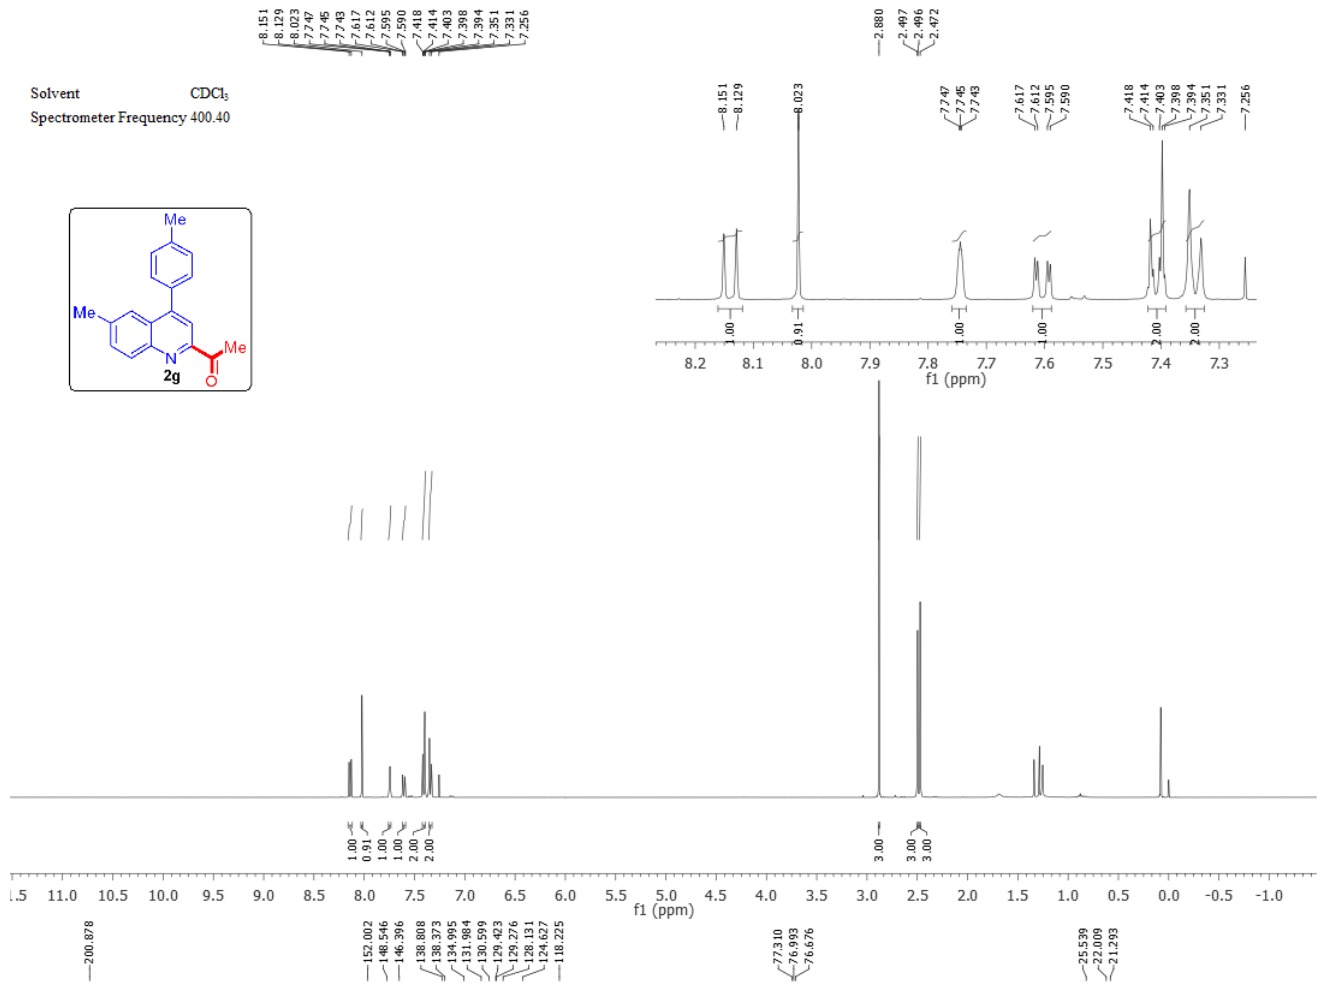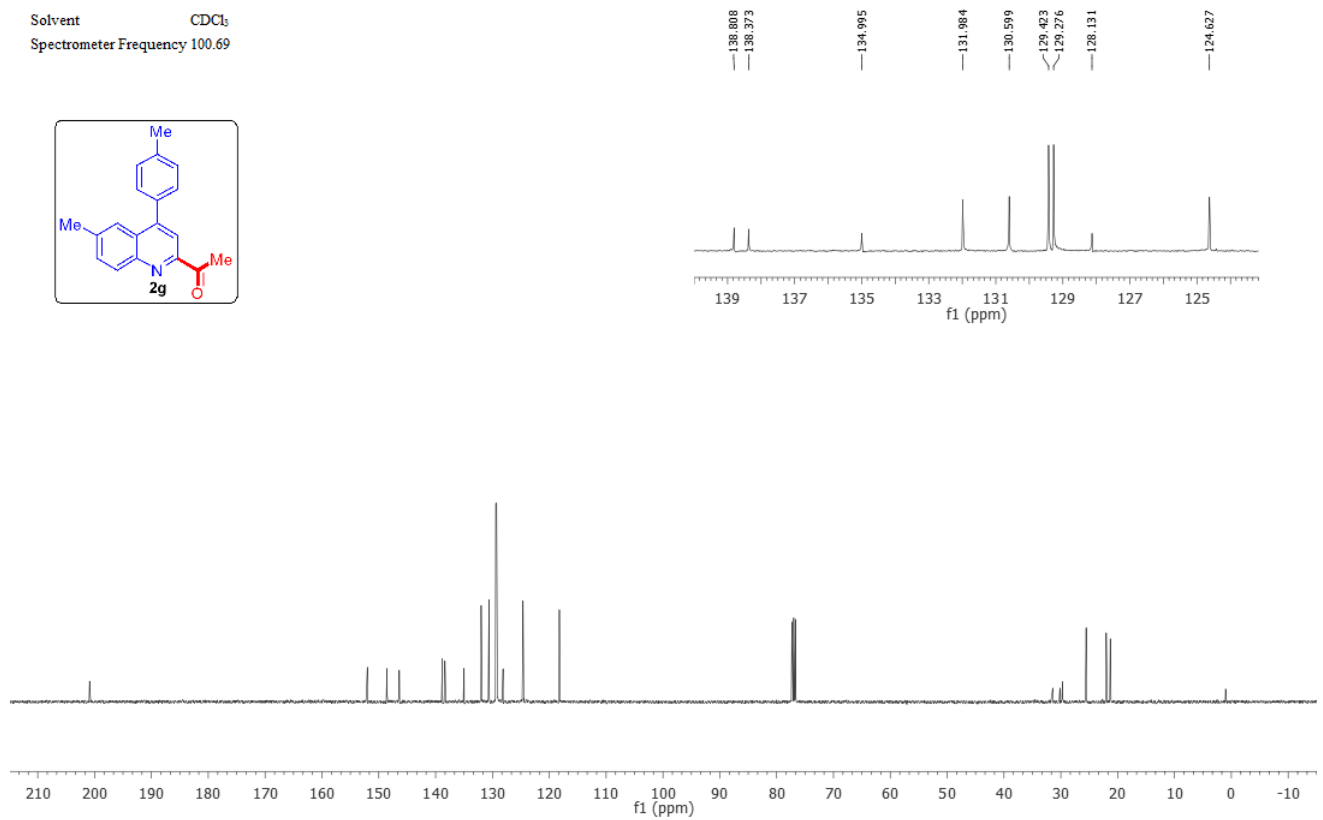

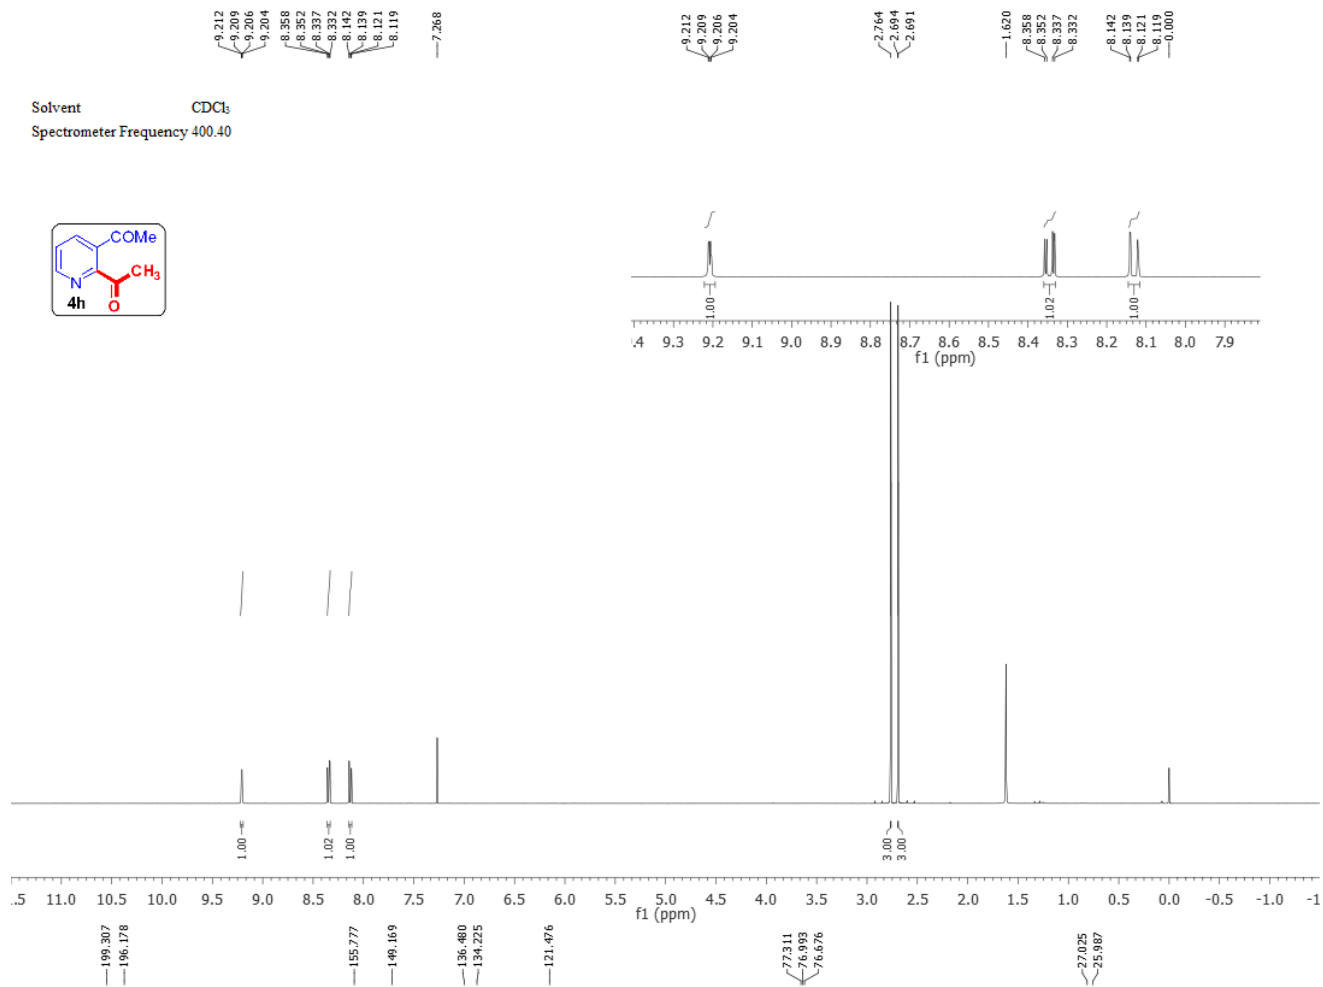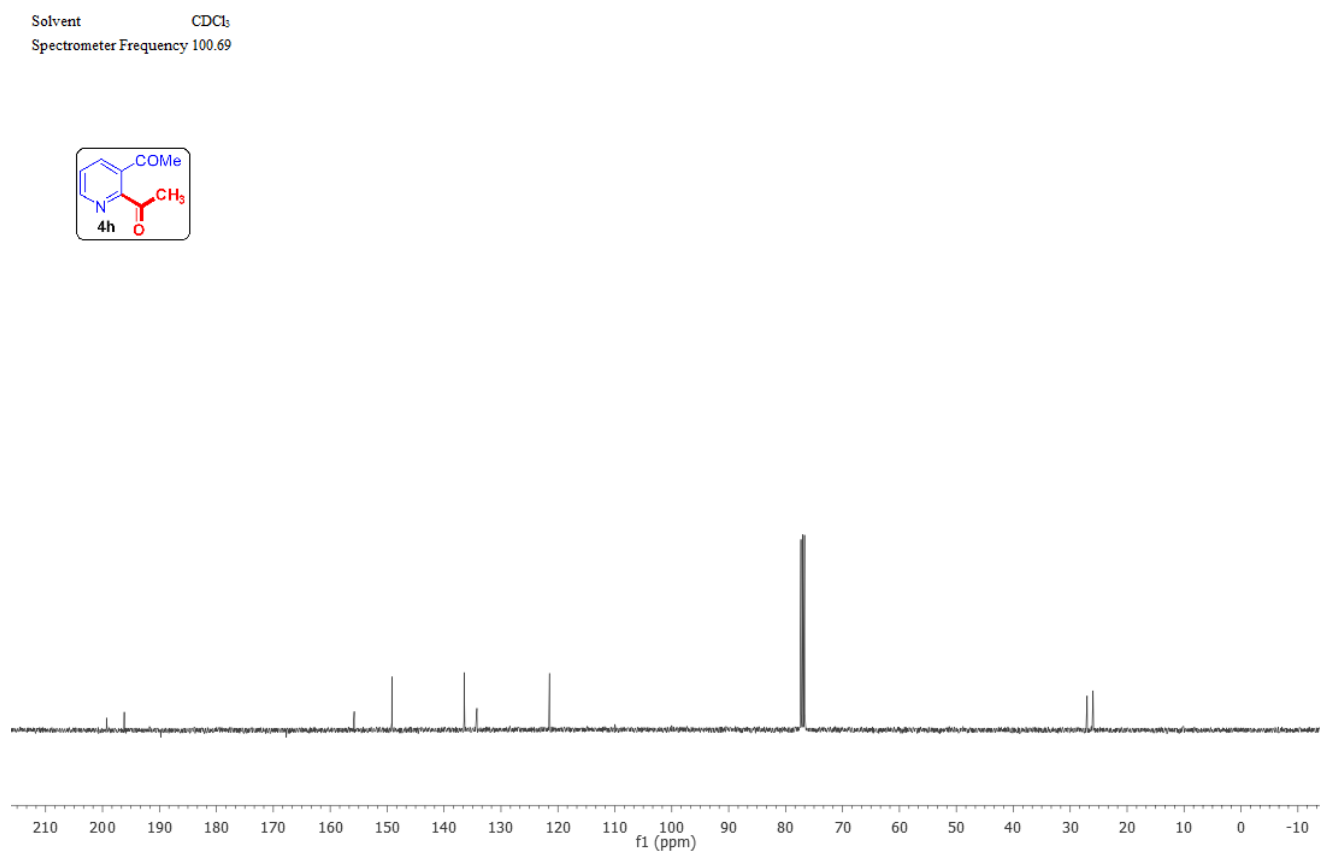

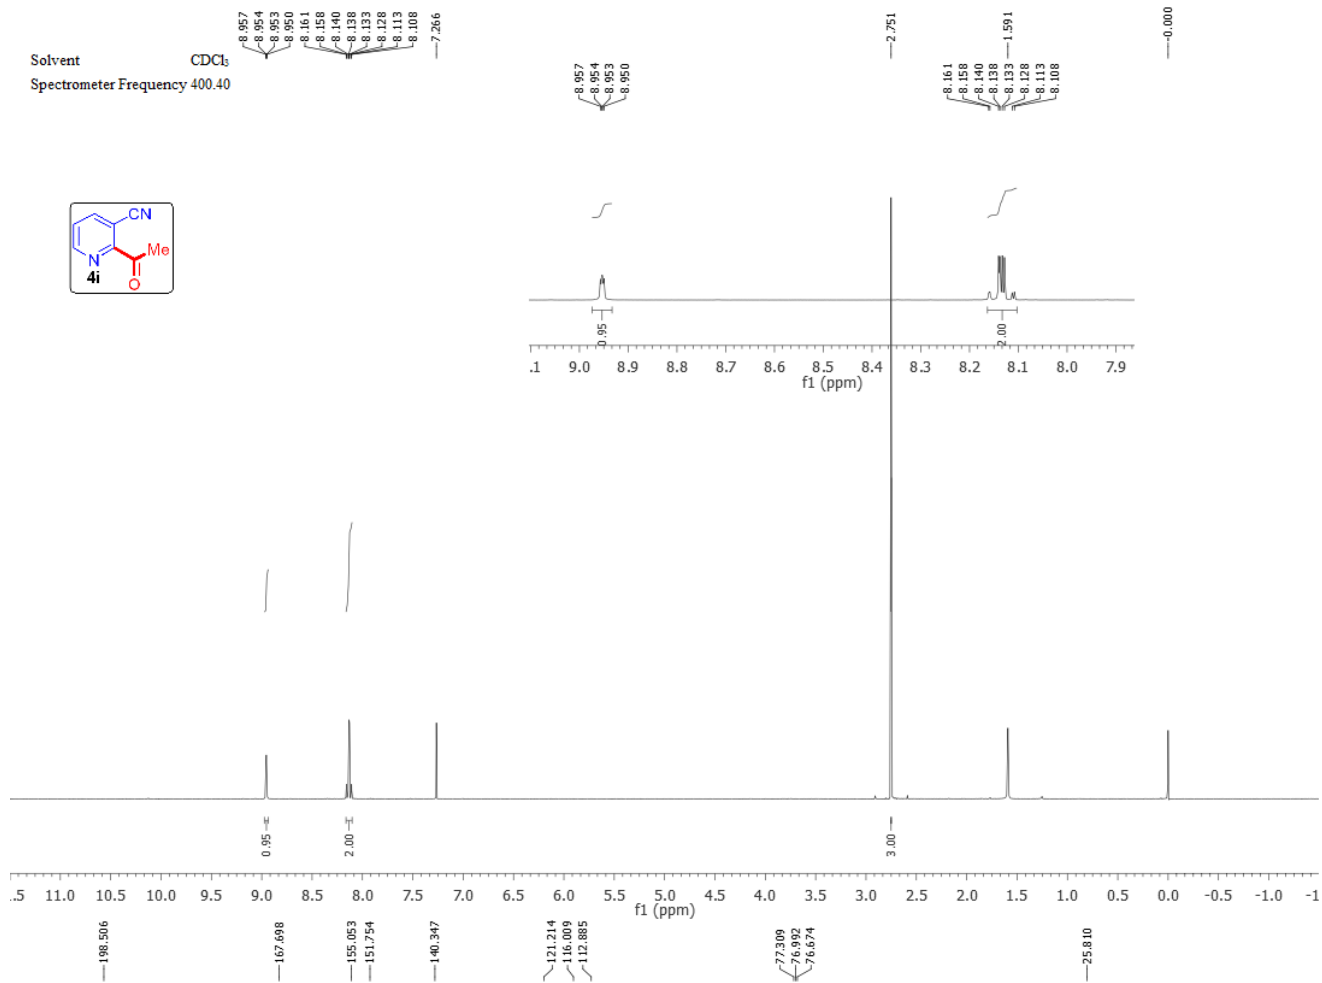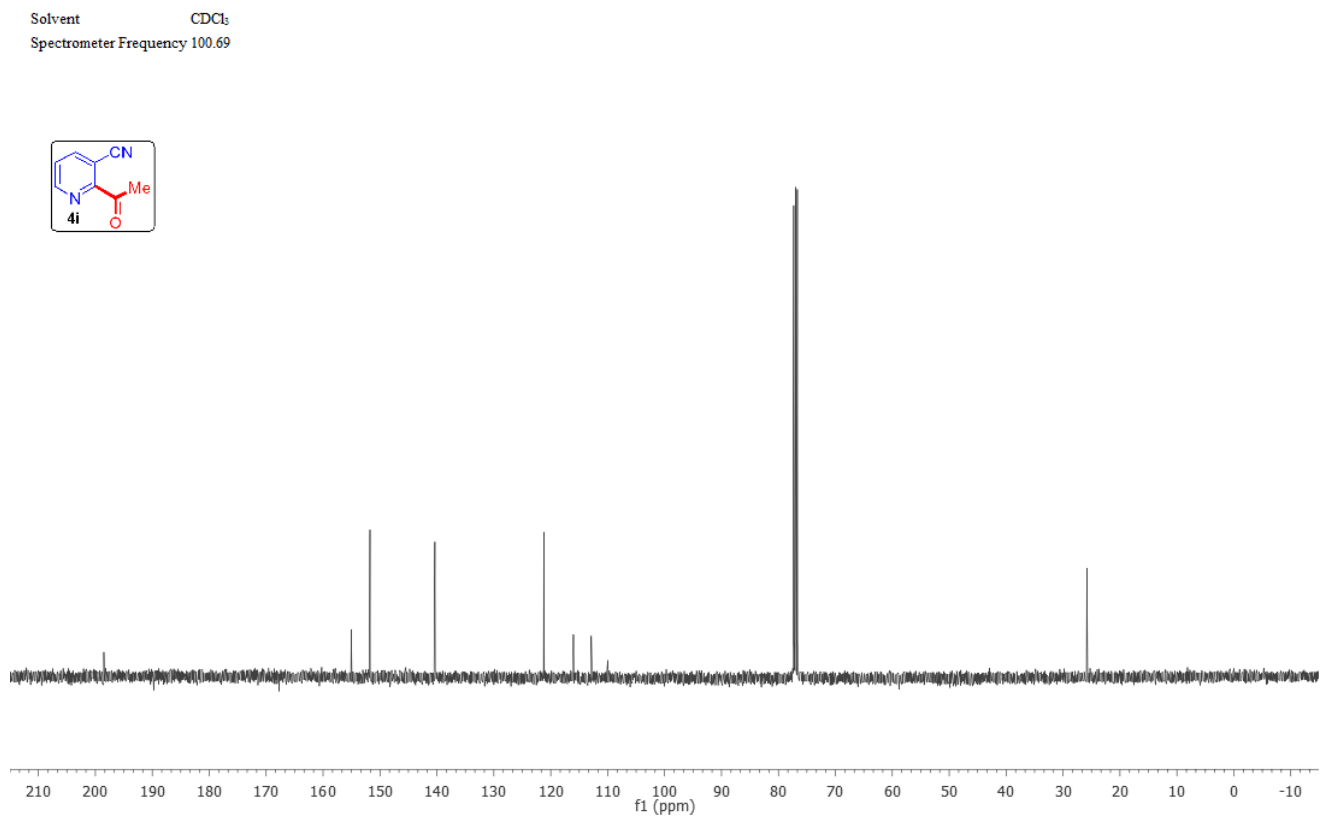

Solvent CDCl<sub>3</sub>  
Spectrometer Frequency 400.40

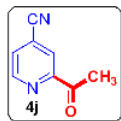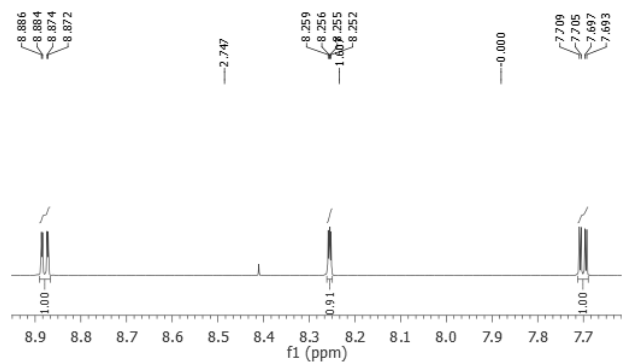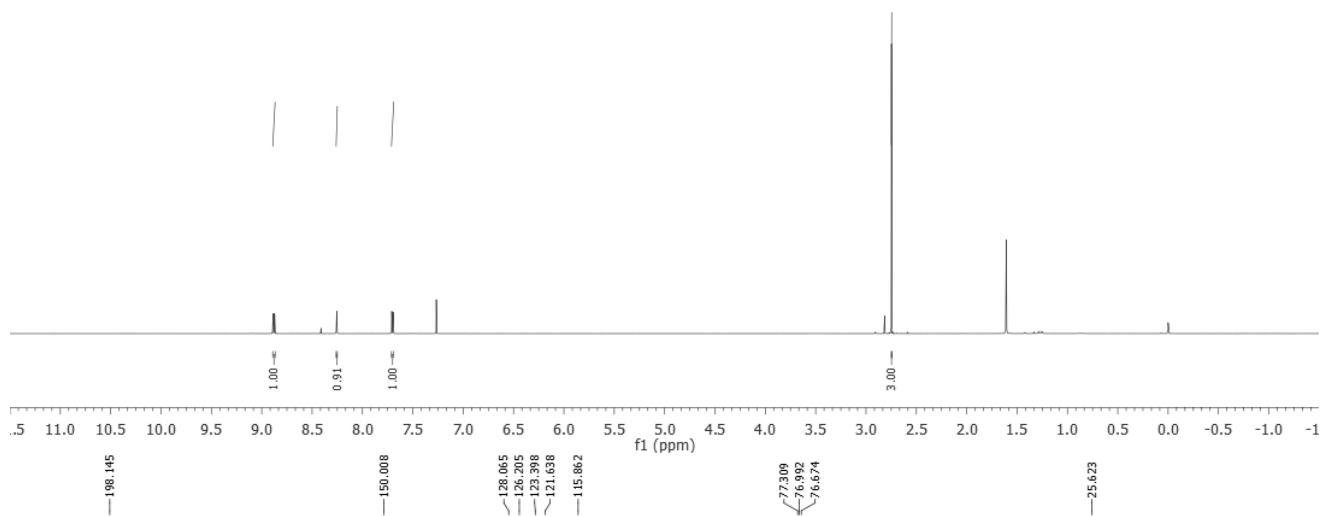

Solvent CDCl<sub>3</sub>  
Spectrometer Frequency 100.69

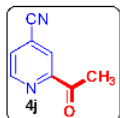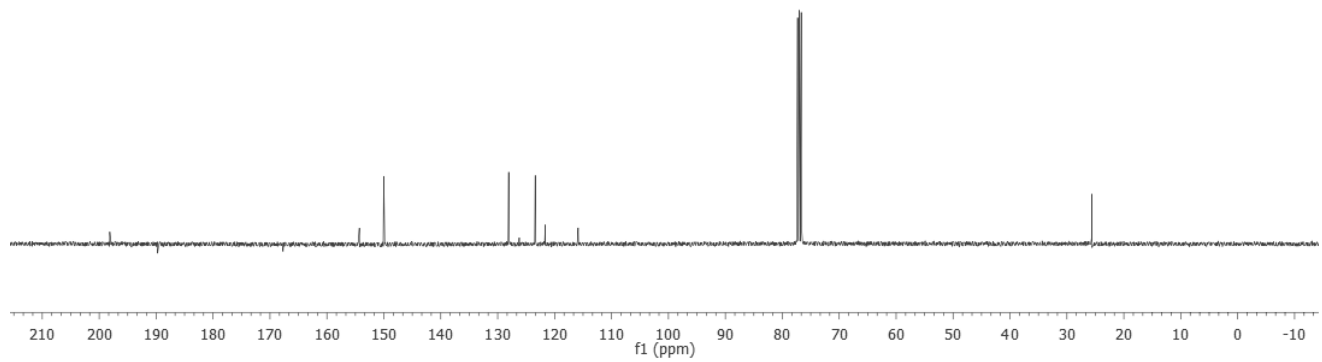

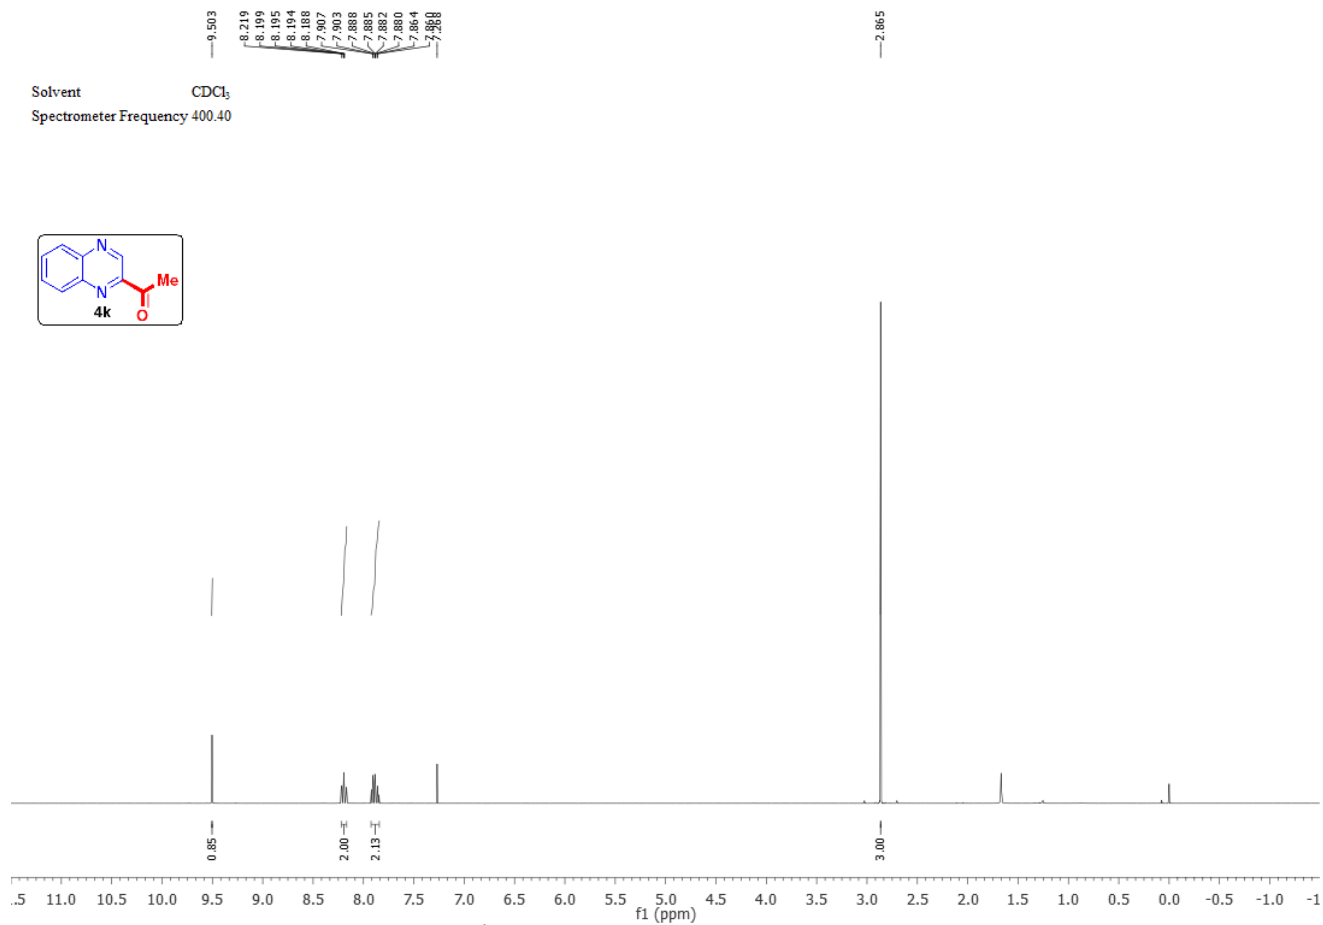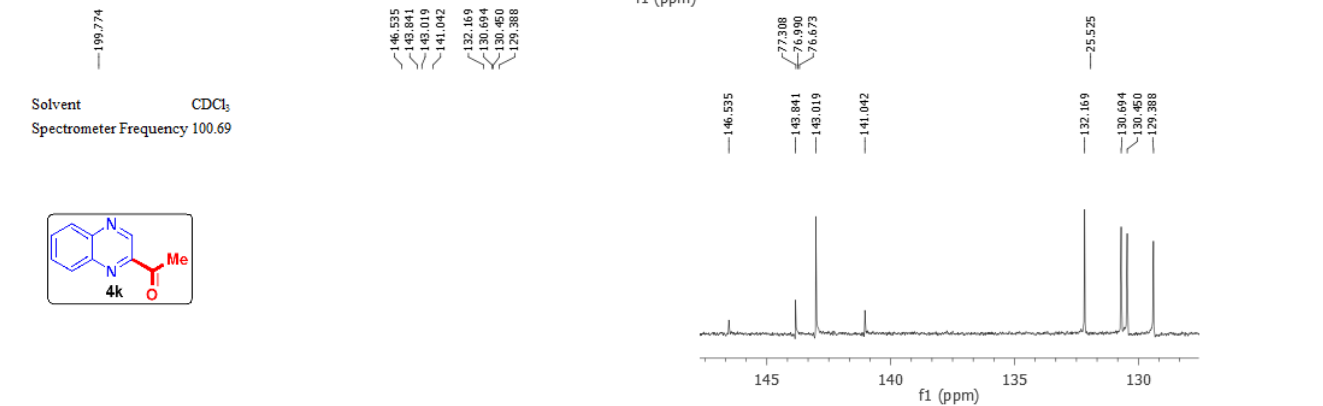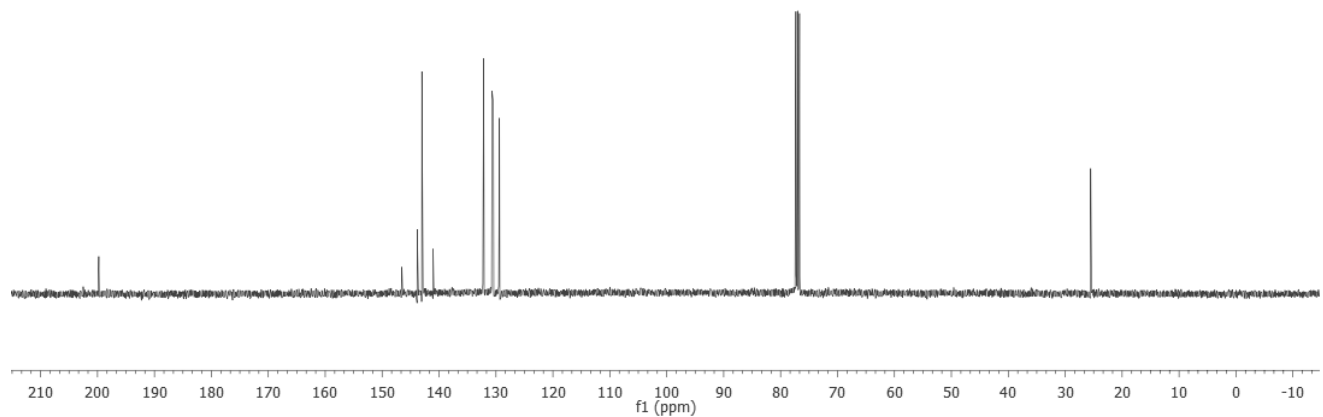



8.174  
8.169  
8.166  
8.157  
8.153  
8.150  
7.886  
7.885  
7.881  
7.877  
7.873  
7.864  
7.860  
7.855  
7.852  
7.839  
7.835  
7.830  
7.826  
7.822  
7.809  
7.806  
7.802  
7.788  
7.785  
7.565  
7.560  
7.555  
7.544  
7.539  
7.535  
7.519  
7.299  
7.282

— 2.748  
— 2.484

Solvent CDCl<sub>3</sub>  
Spectrometer Frequency 400.40

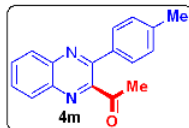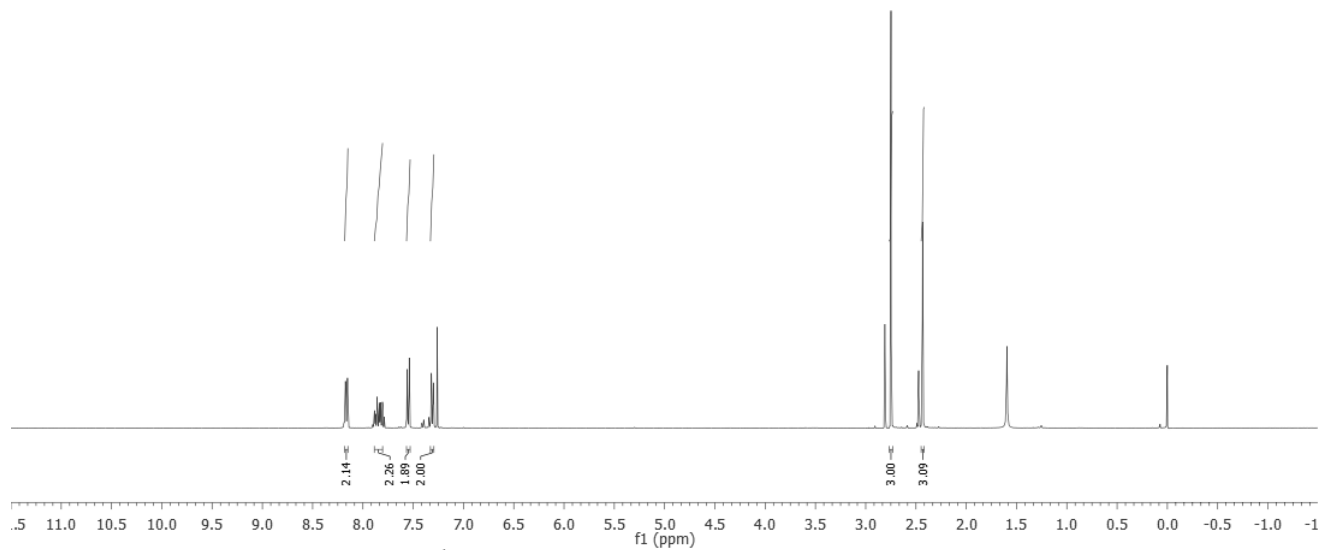

201.418

152.334  
150.230  
142.367  
139.599  
135.029  
132.605  
132.020  
131.682  
130.599  
129.209  
129.351  
129.268  
128.860

77.310  
76.993  
76.675

28.583

21.404

Solvent CDCl<sub>3</sub>  
Spectrometer Frequency 100.69

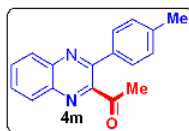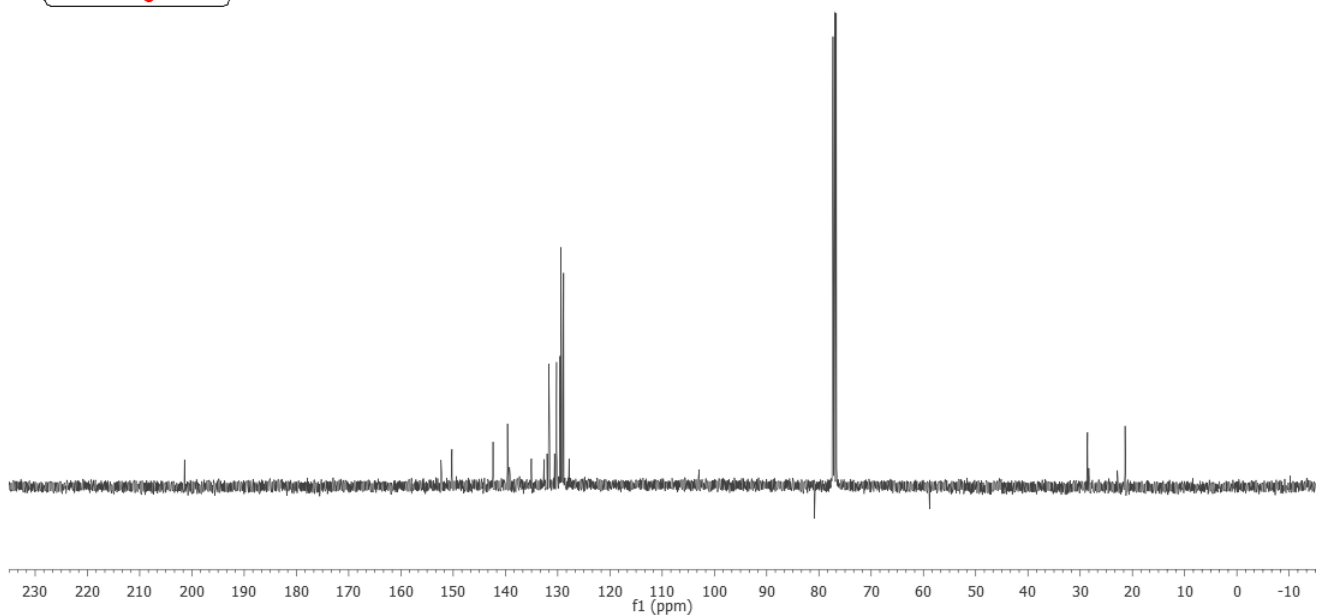



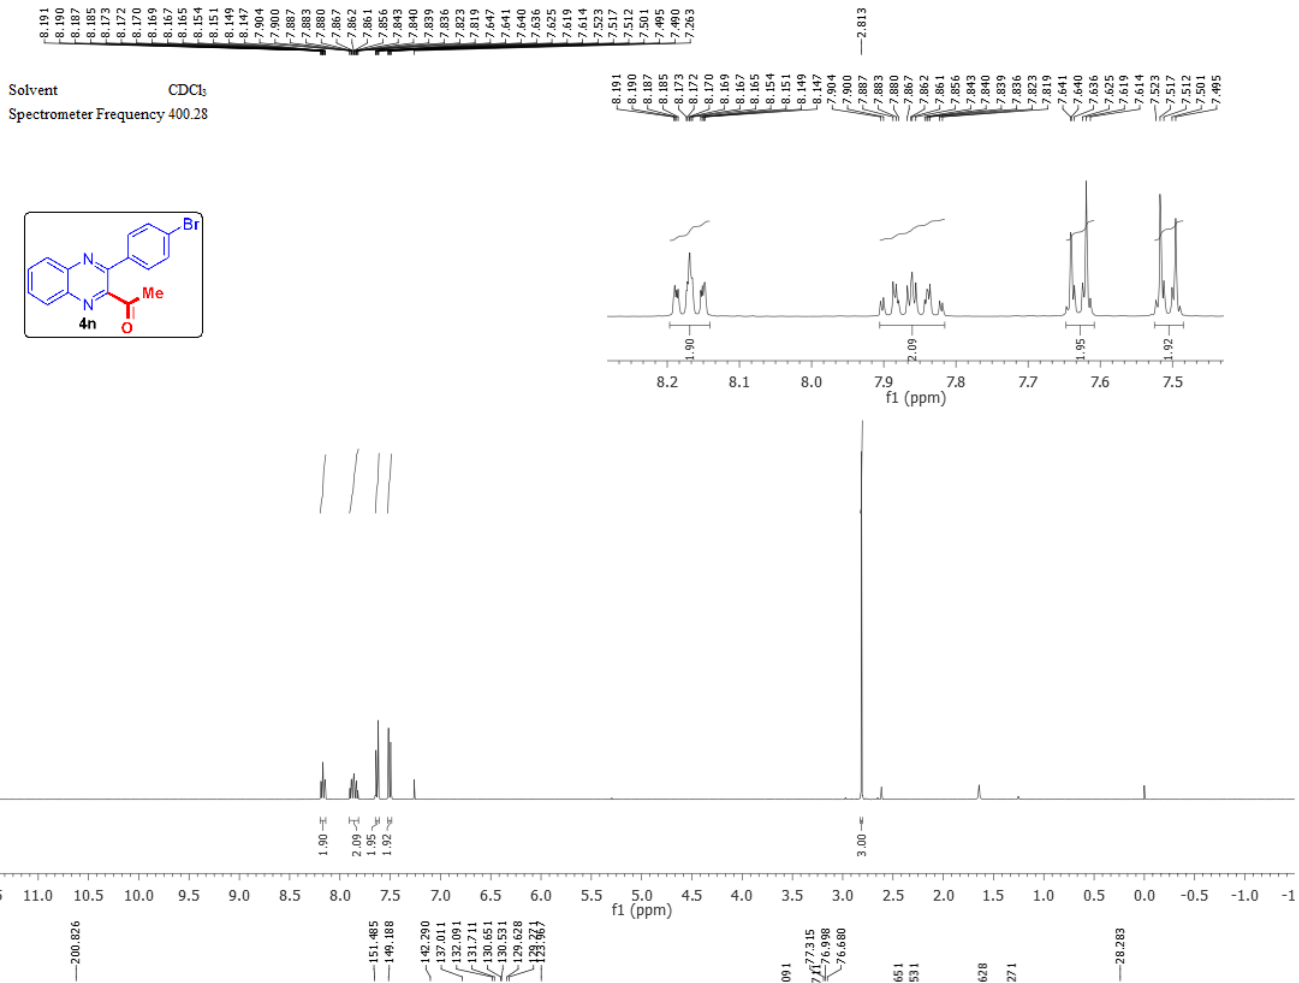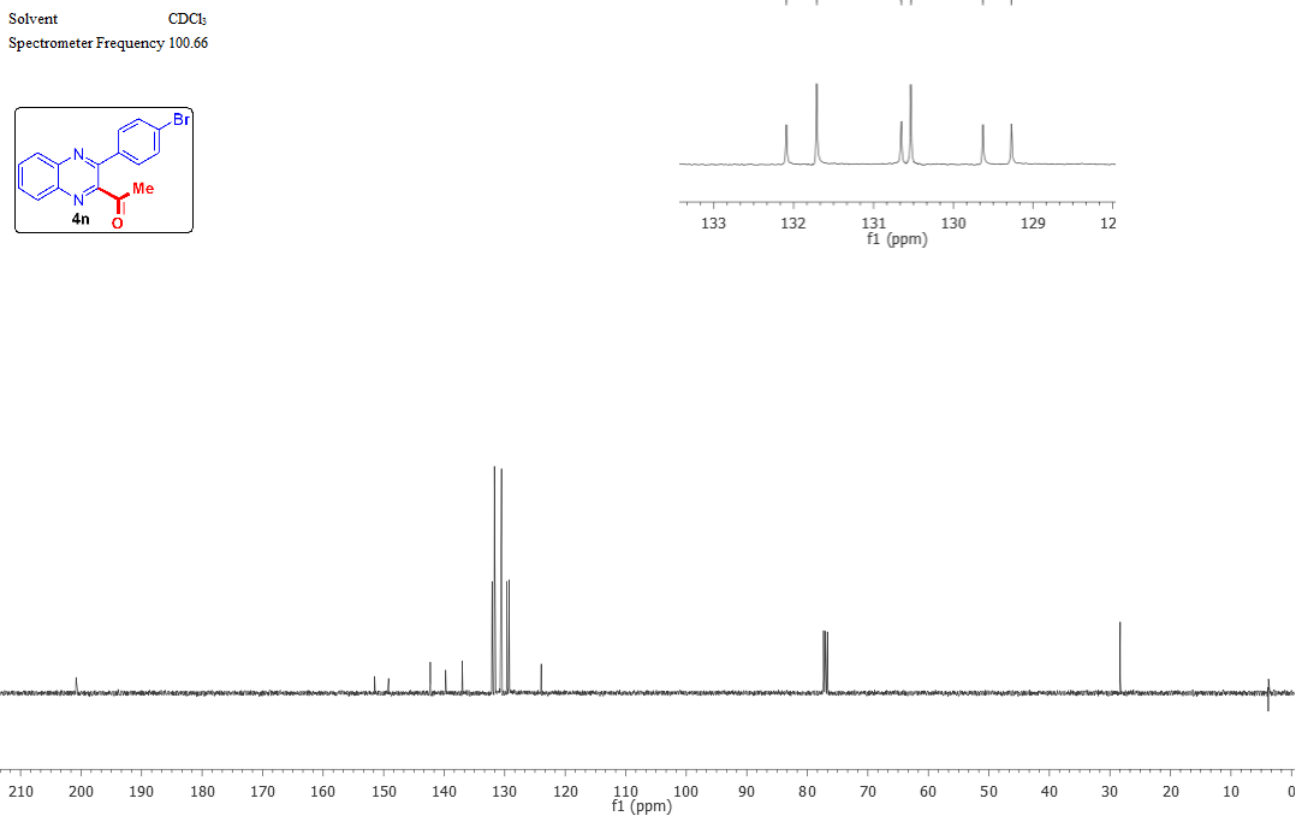

Solvent  $\text{CDCl}_3$   
 Spectrometer Frequency 400.28

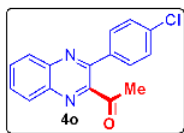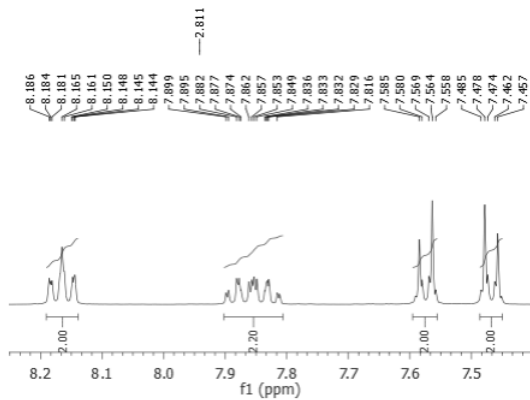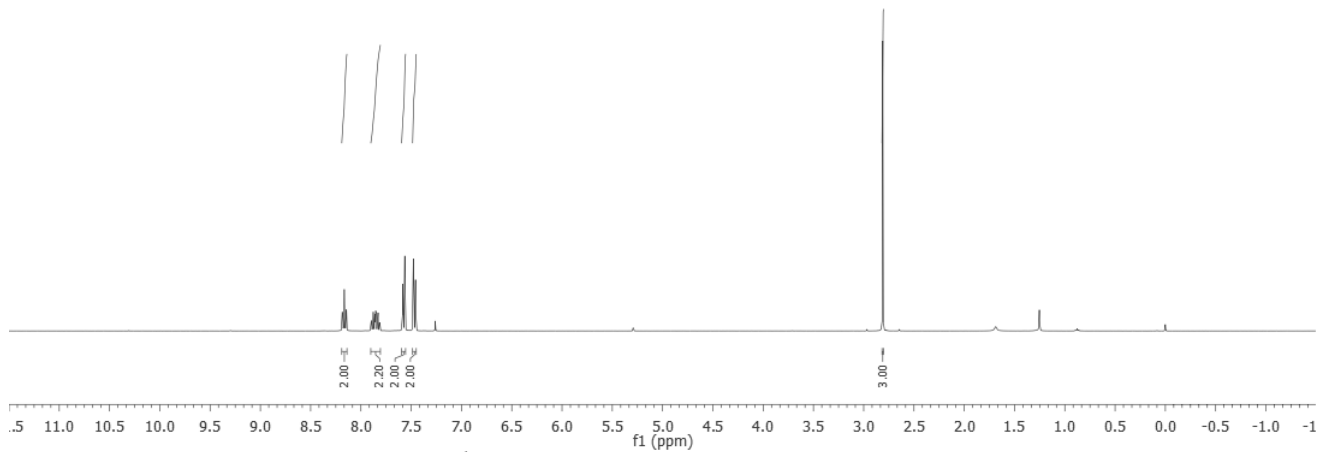

Solvent  $\text{CDCl}_3$   
 Spectrometer Frequency 100.66

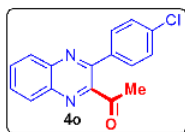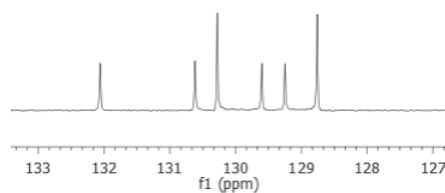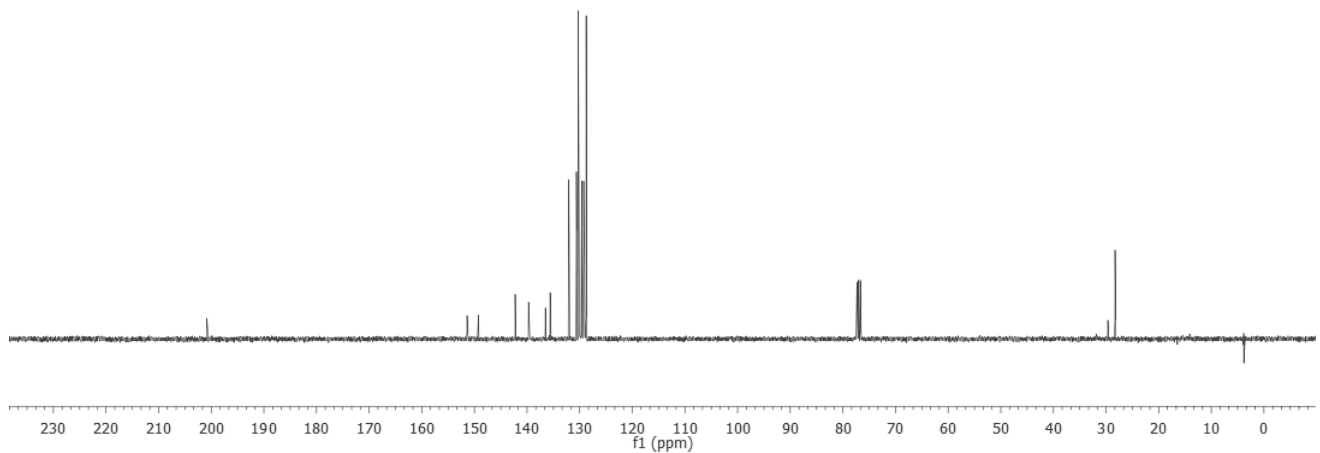

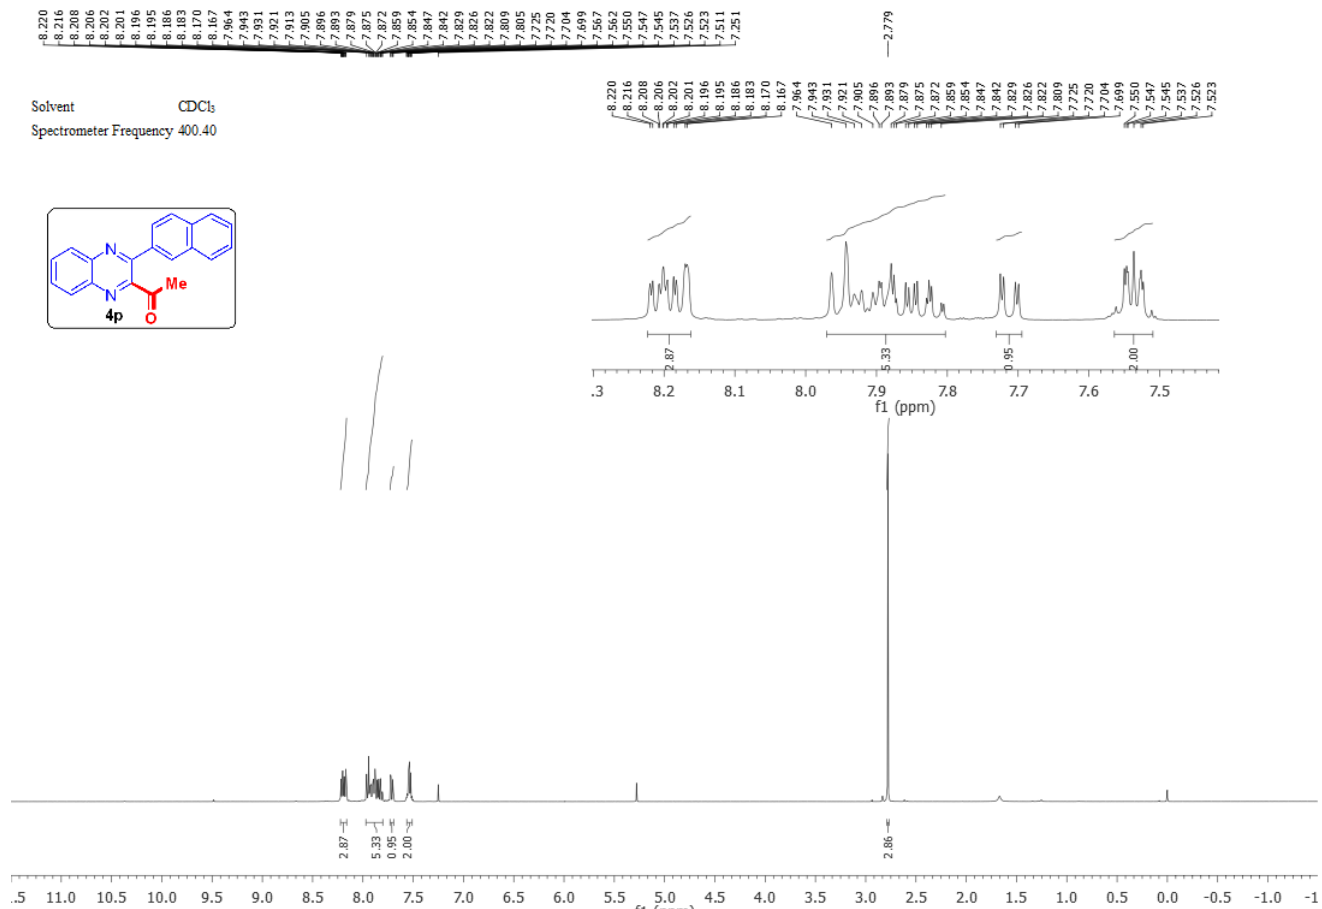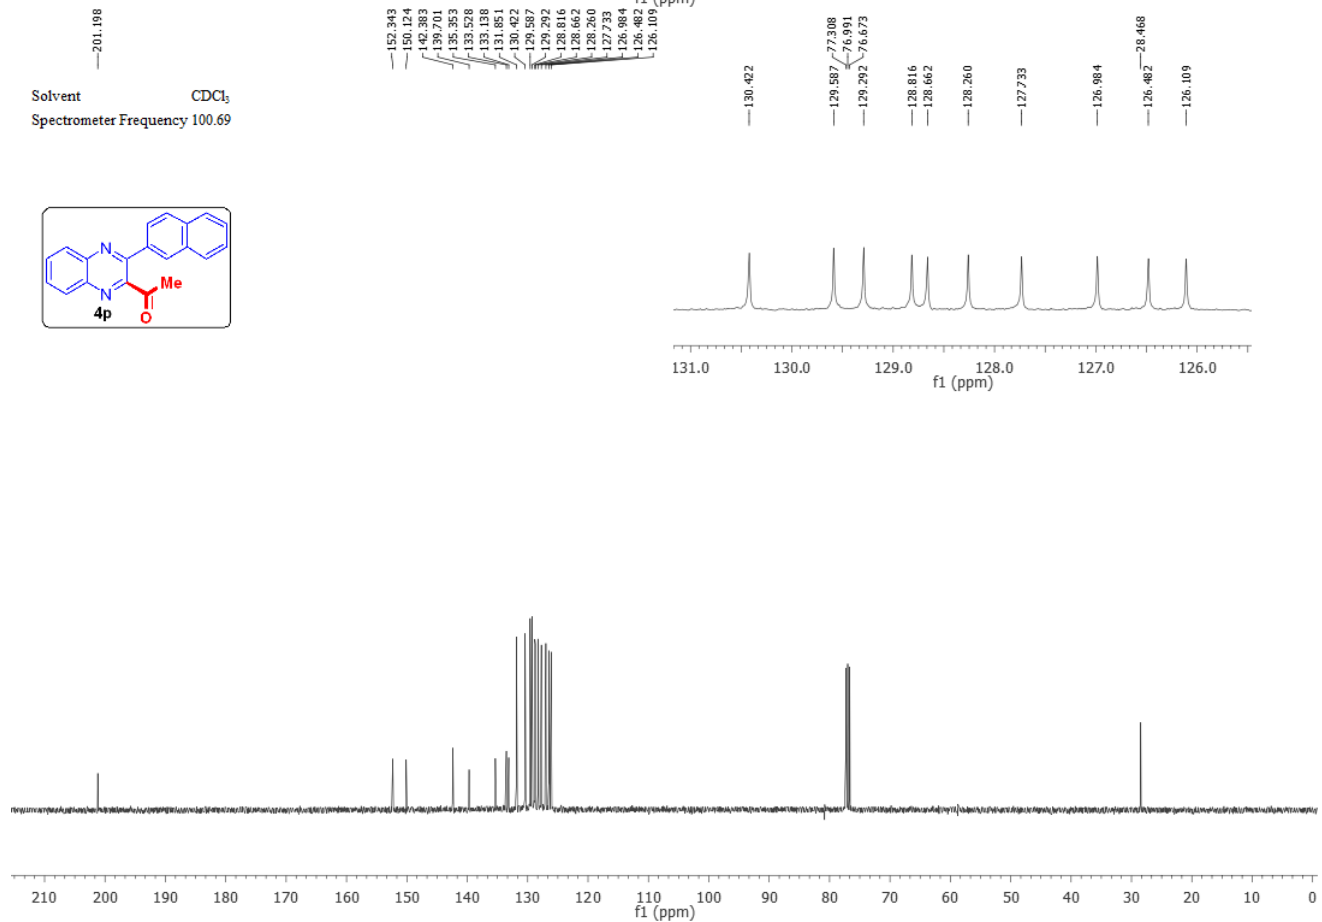

Solvent CDCl<sub>3</sub>  
Spectrometer Frequency 400.40

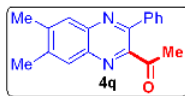

7.917  
7.915  
7.623  
7.617  
7.612  
7.611  
7.603  
7.599  
7.488  
7.484  
7.481  
7.475  
7.470  
7.261

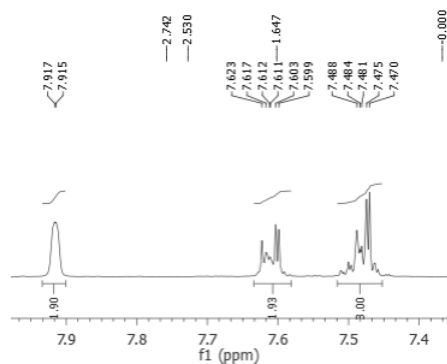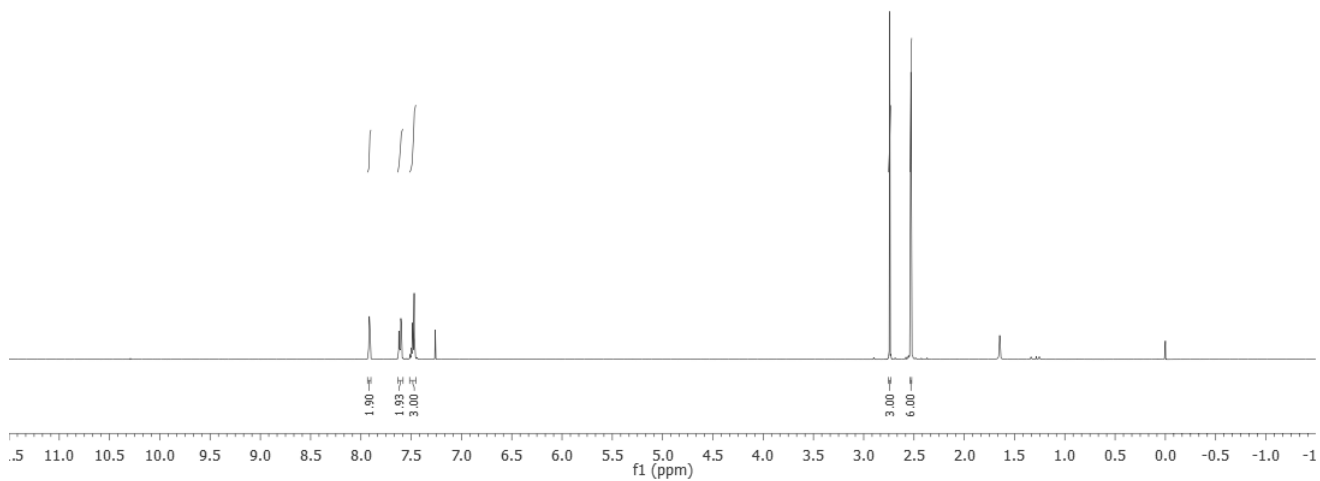

Solvent CDCl<sub>3</sub>  
Spectrometer Frequency 100.69

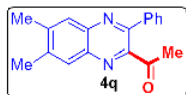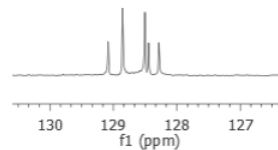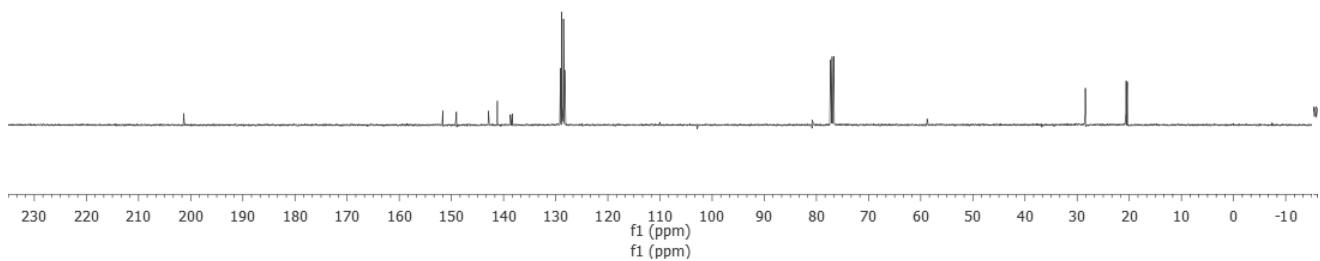

Solvent  $\text{CDCl}_3$   
Spectrometer Frequency 400.40

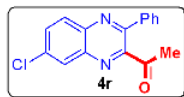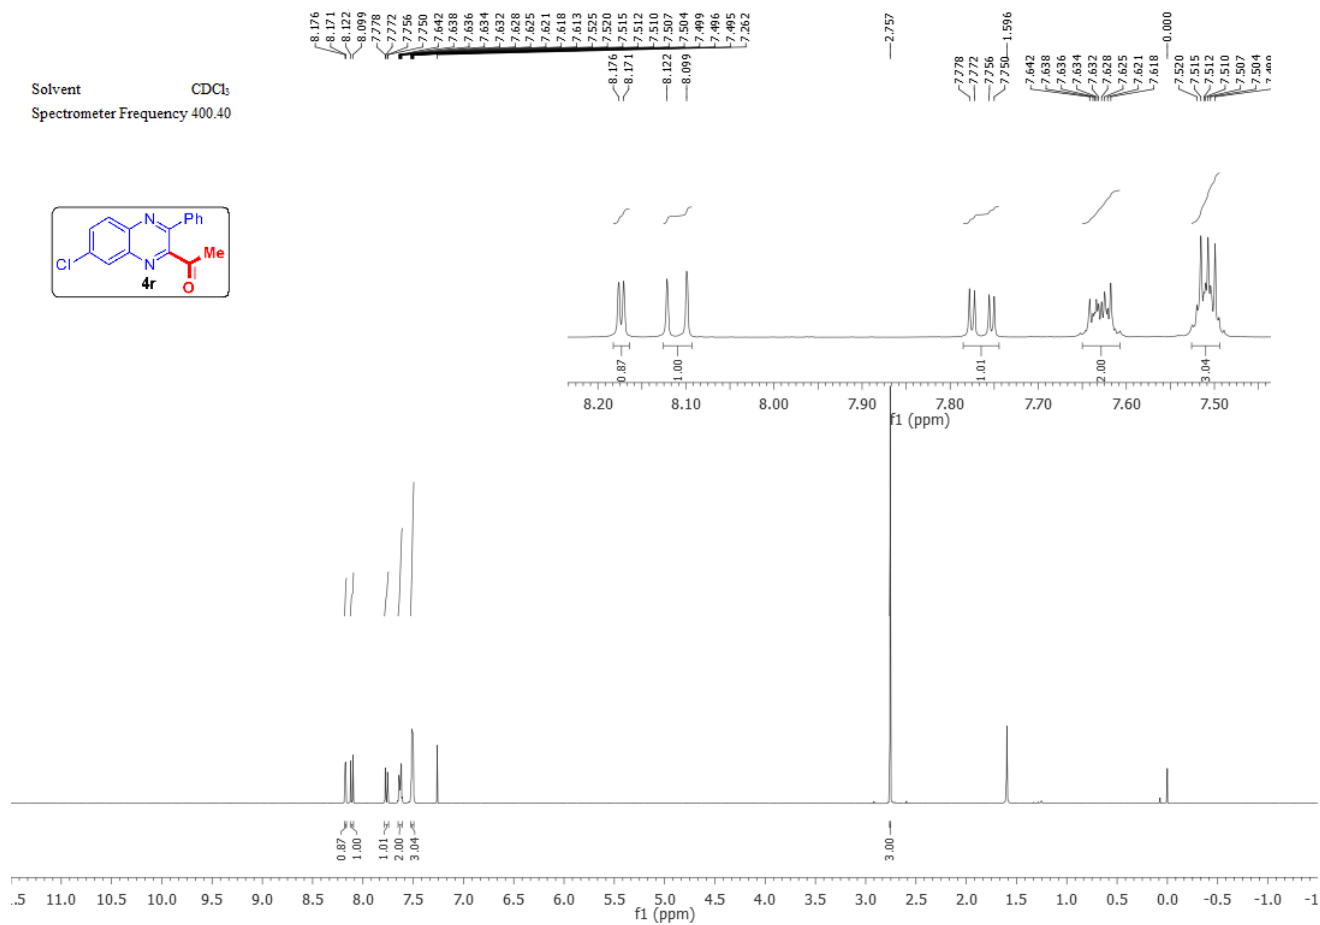

Solvent  $\text{CDCl}_3$   
Spectrometer Frequency 100.69

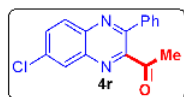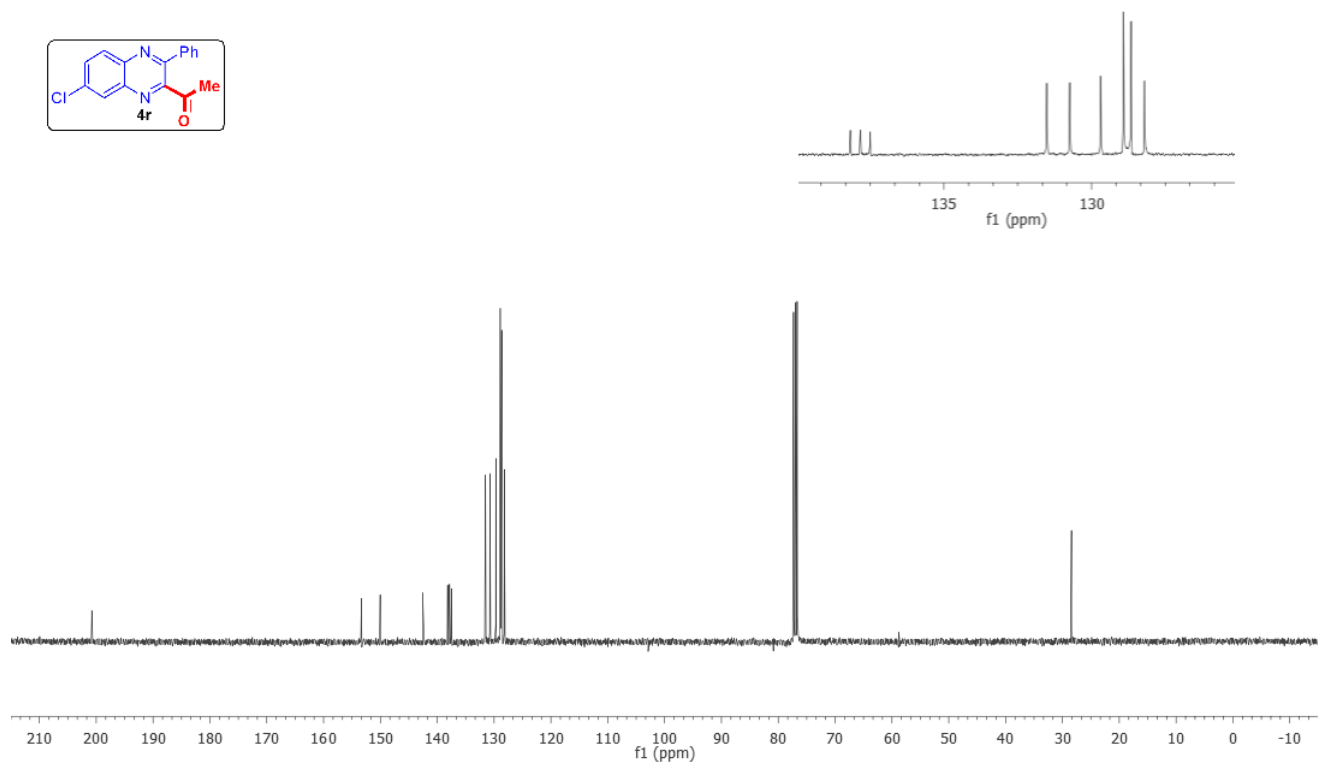



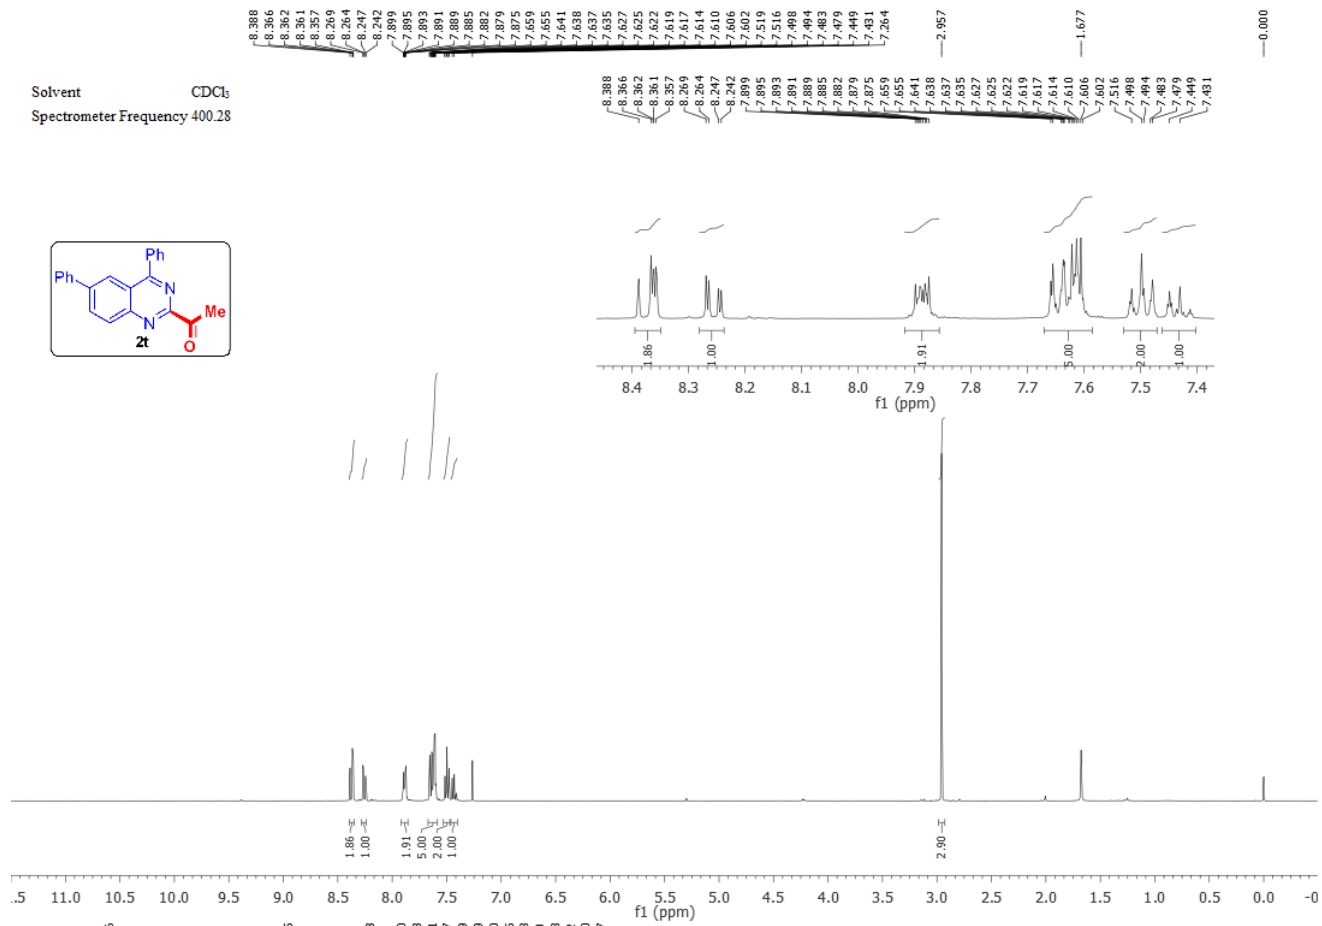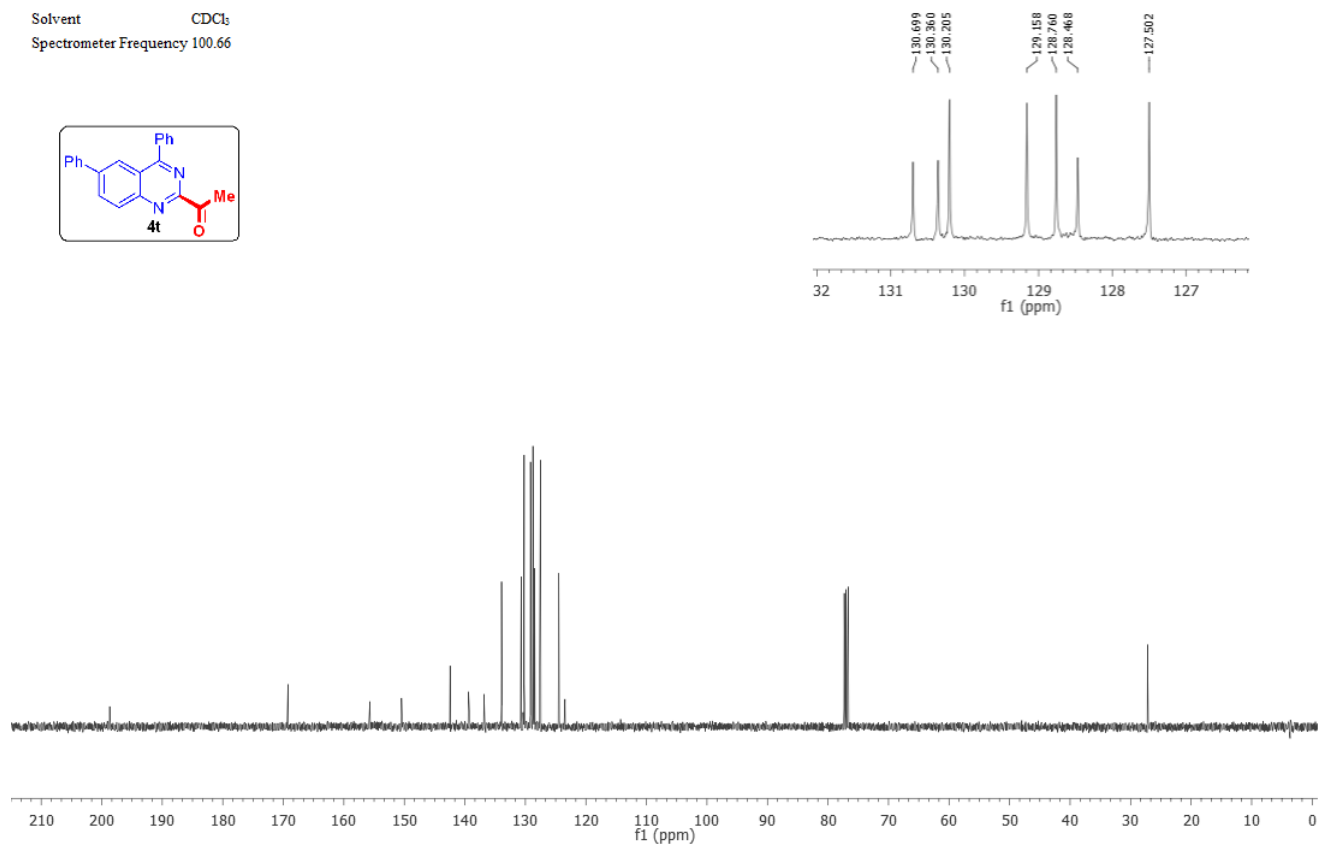

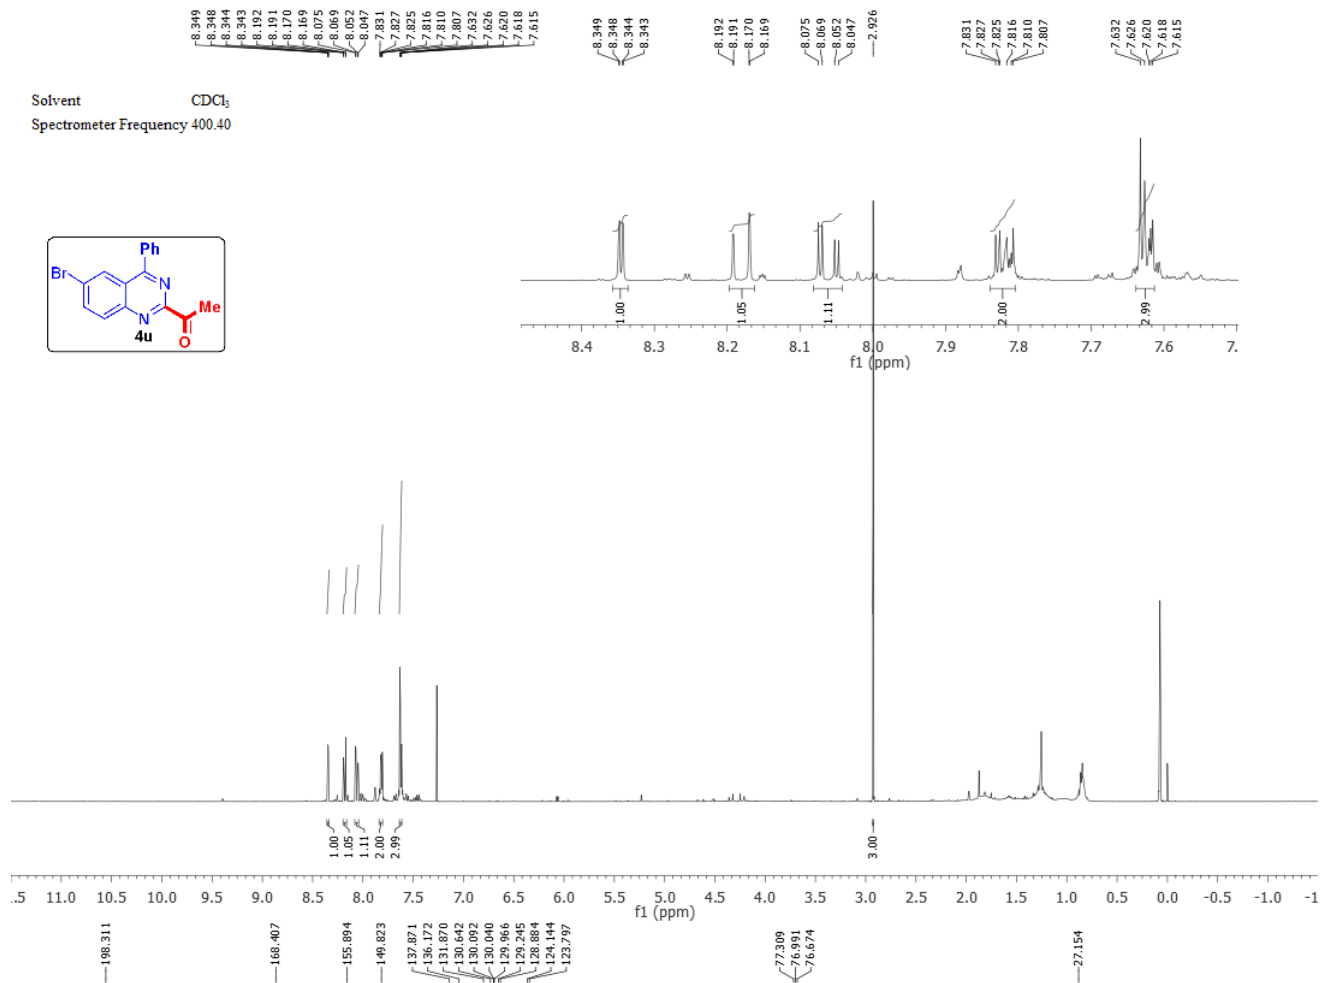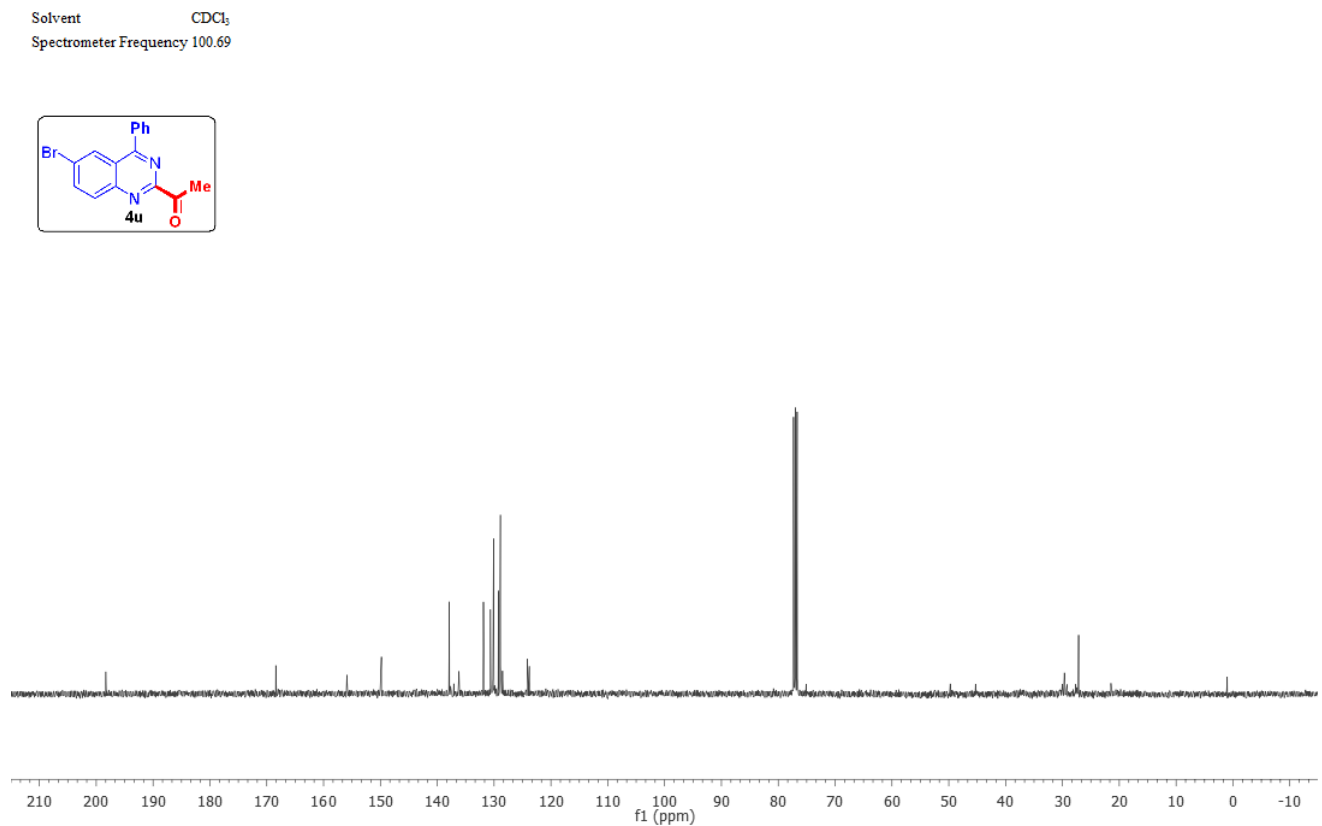



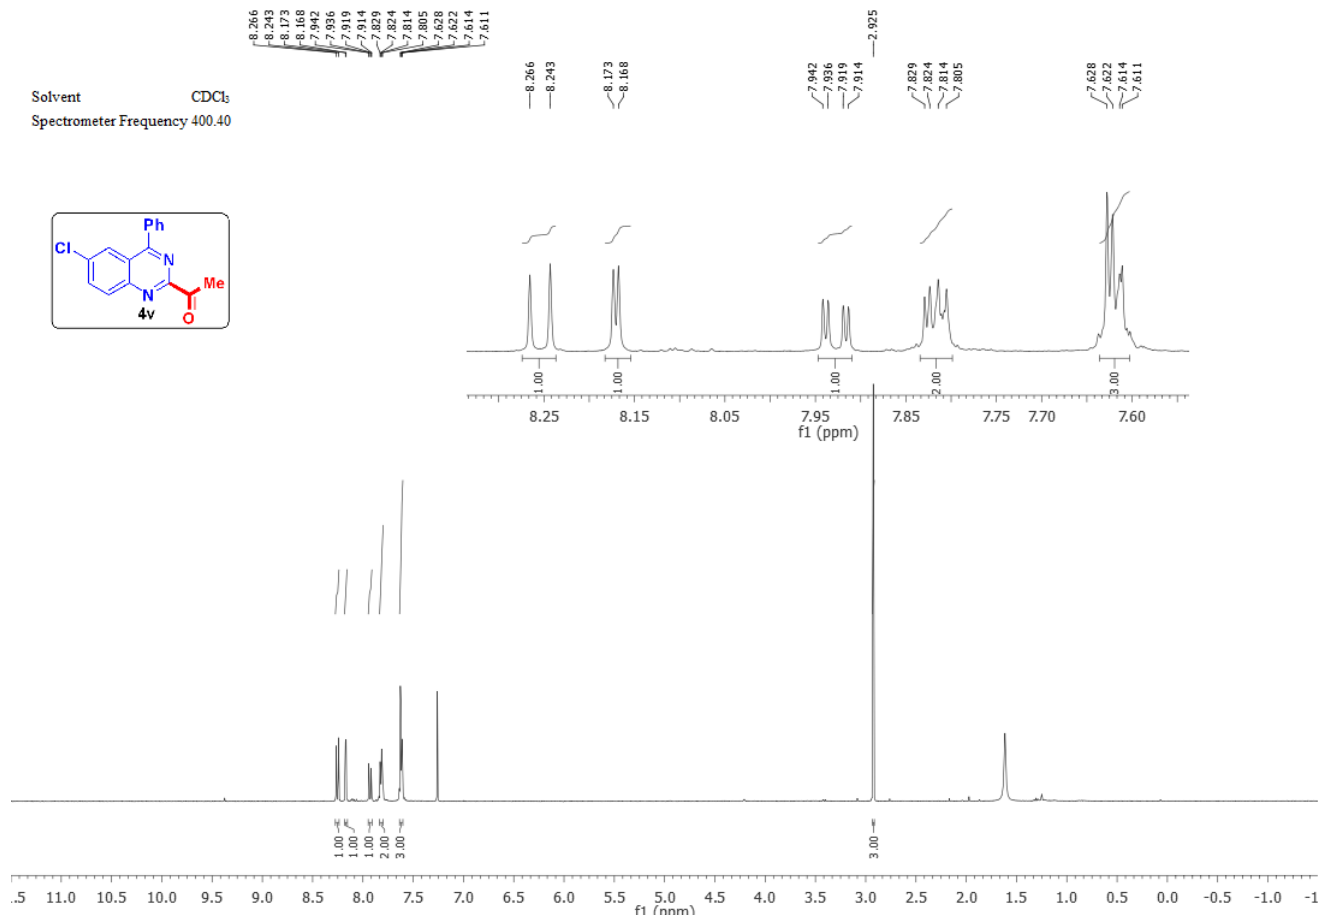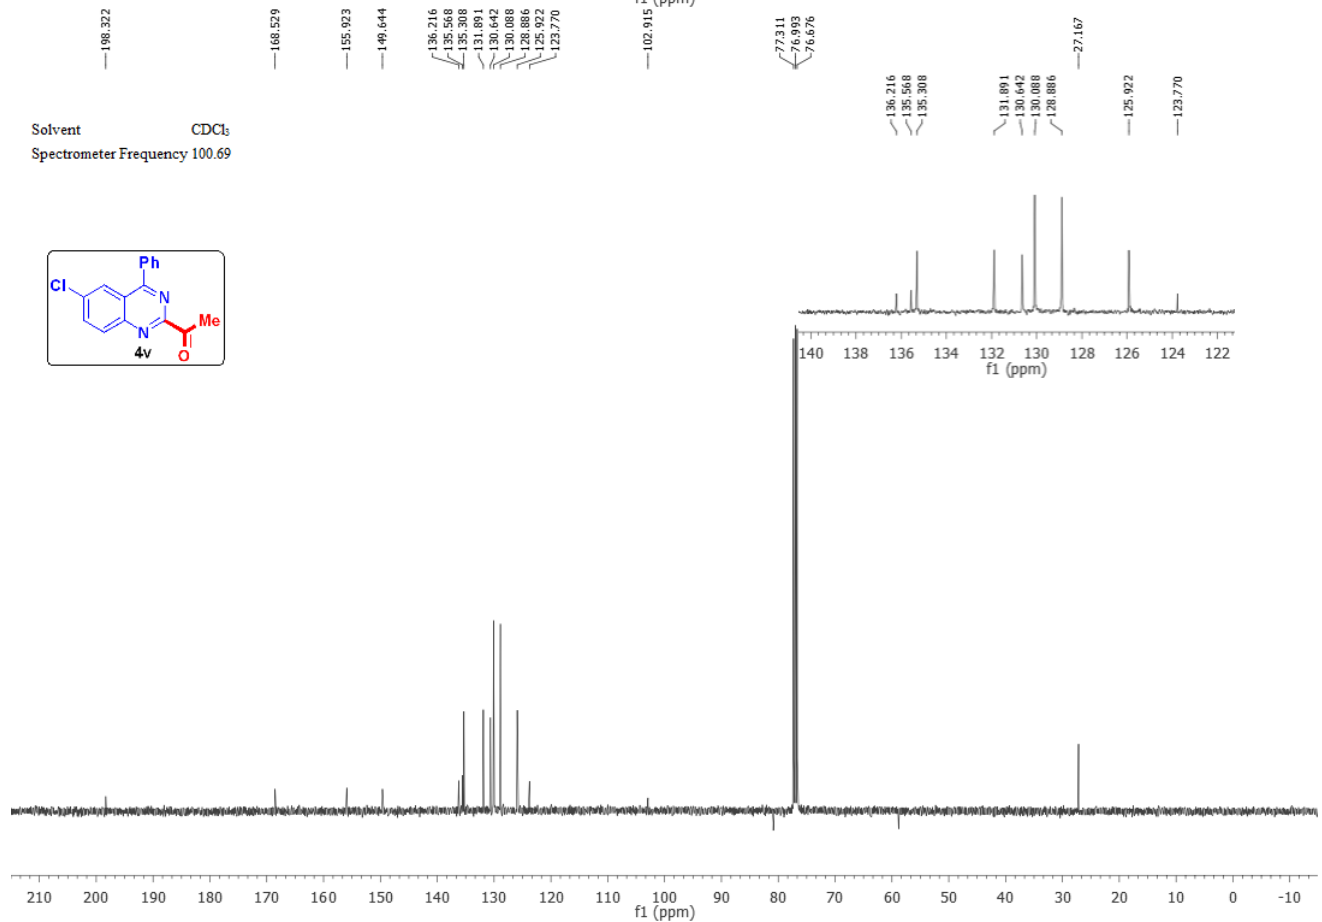

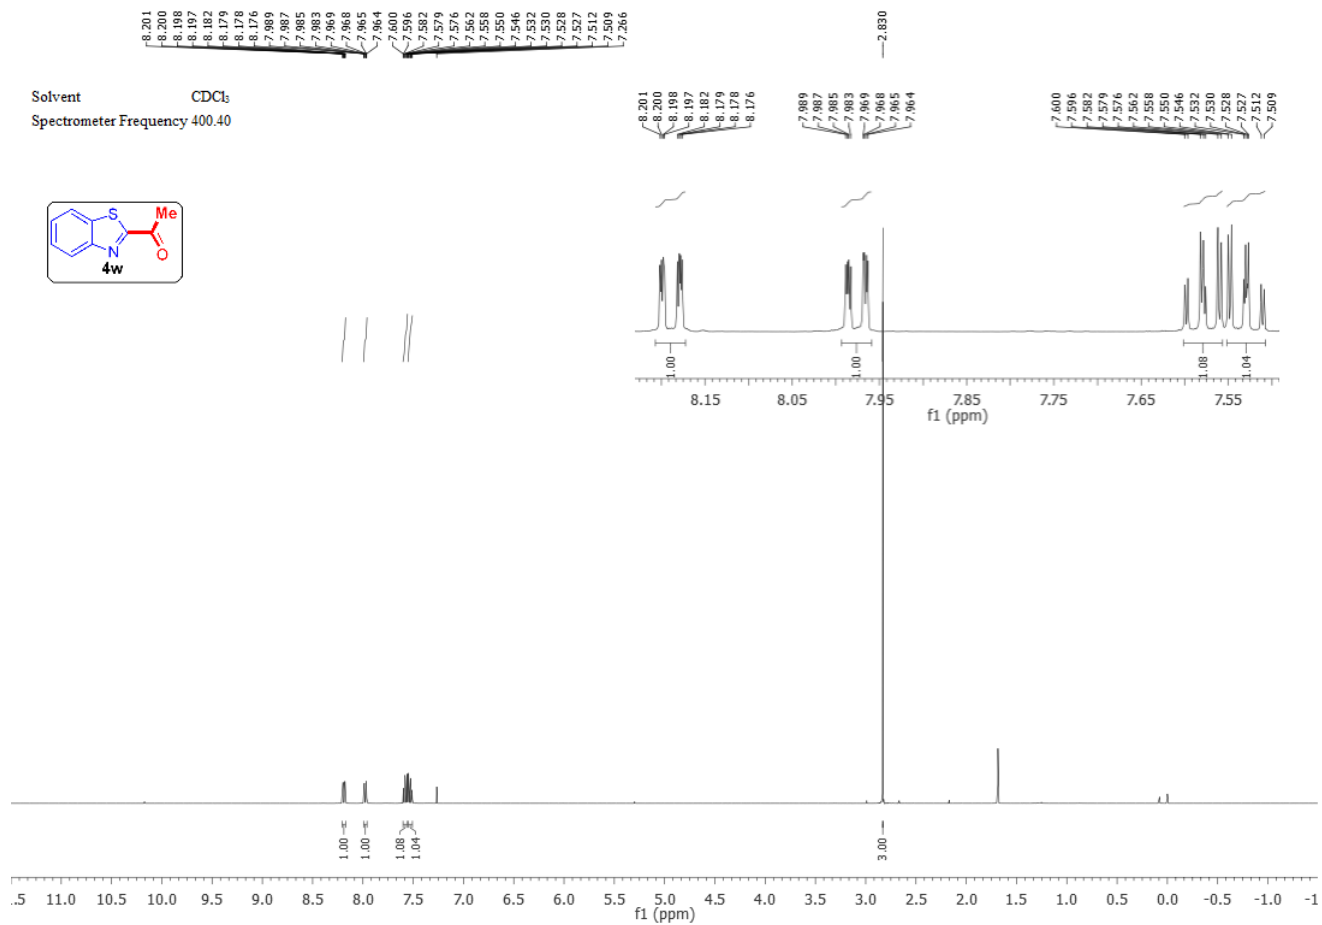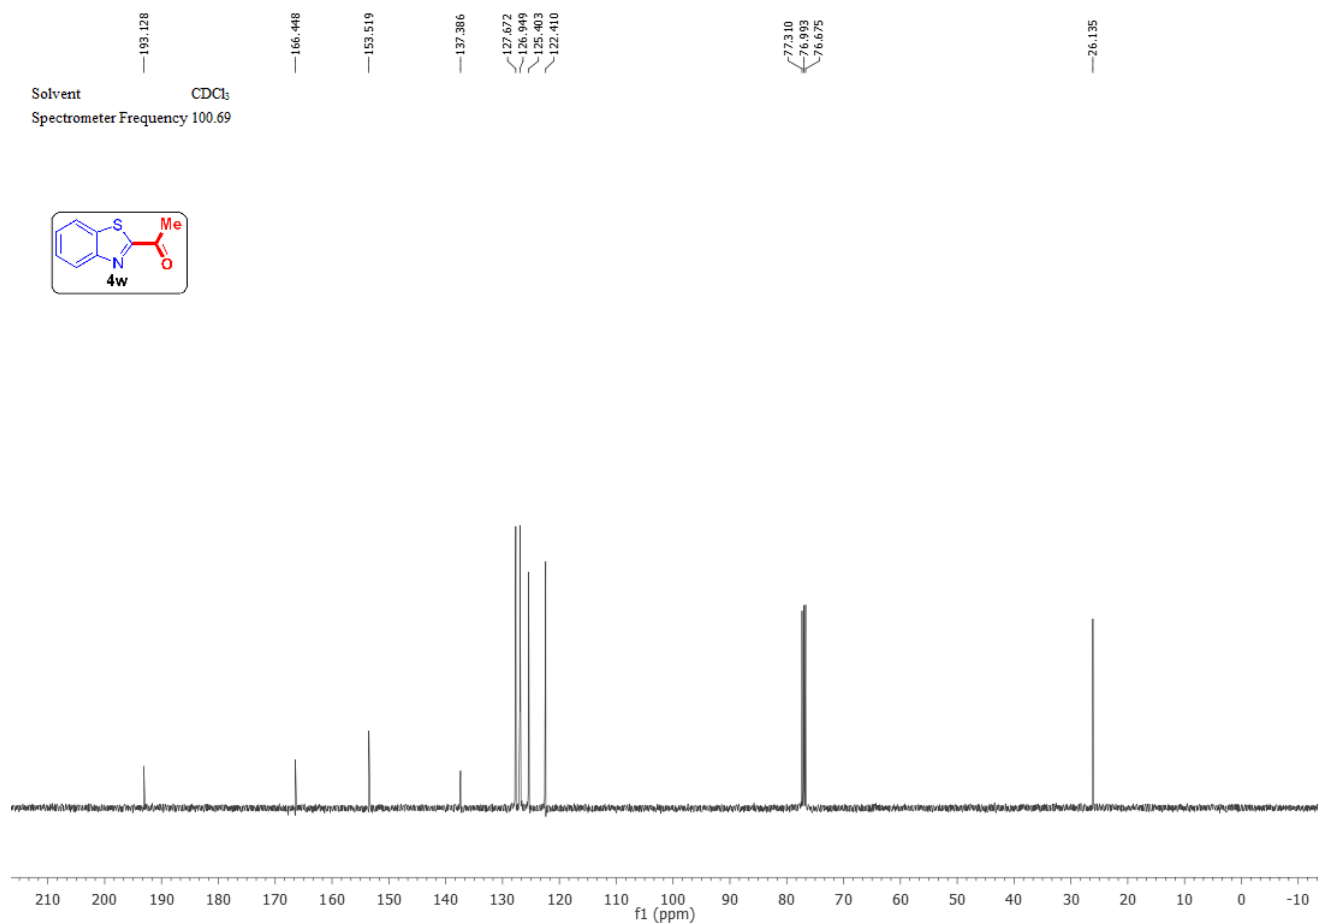

Solvent  $\text{CDCl}_3$   
Spectrometer Frequency 400.40

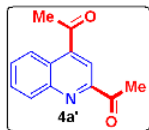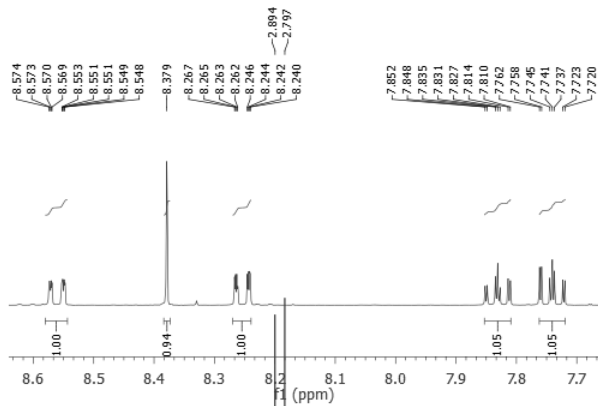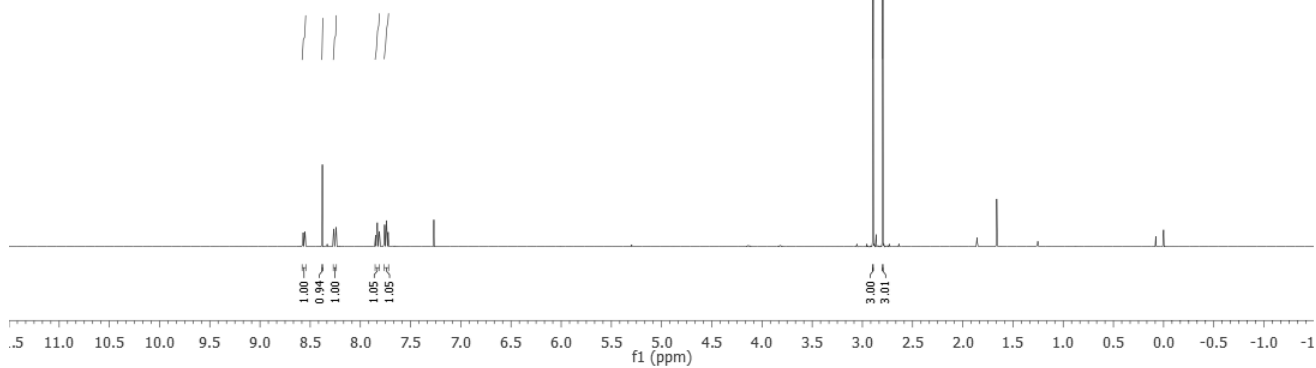

Solvent  $\text{CDCl}_3$   
Spectrometer Frequency 100.69

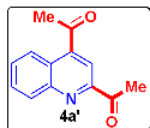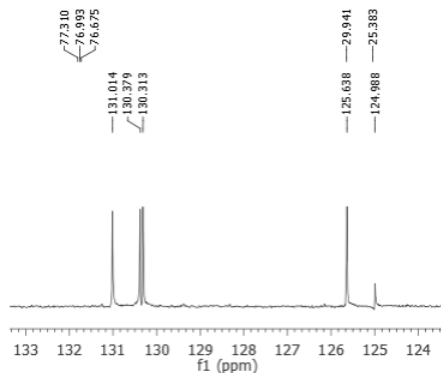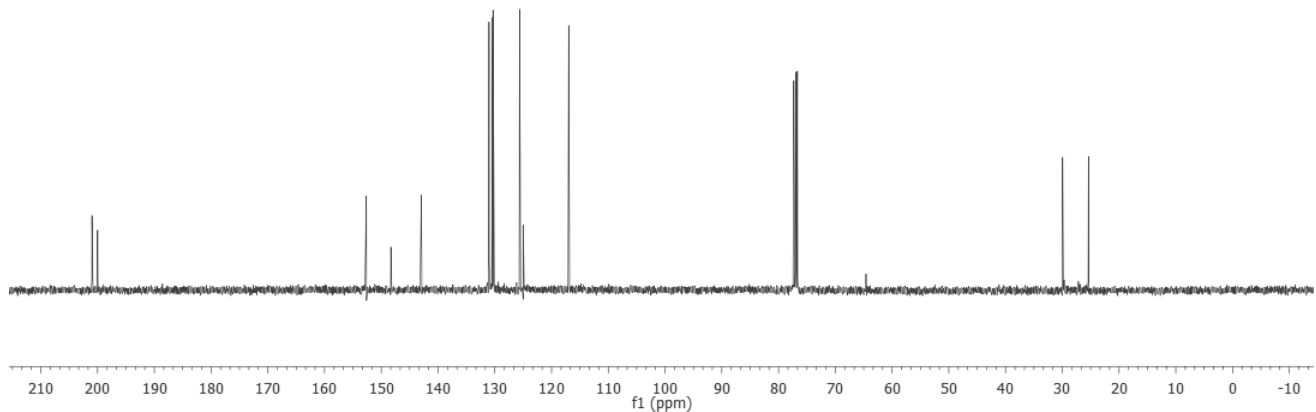

Solvent  $\text{CDCl}_3$   
Spectrometer Frequency 400.28

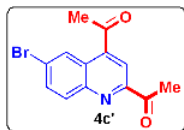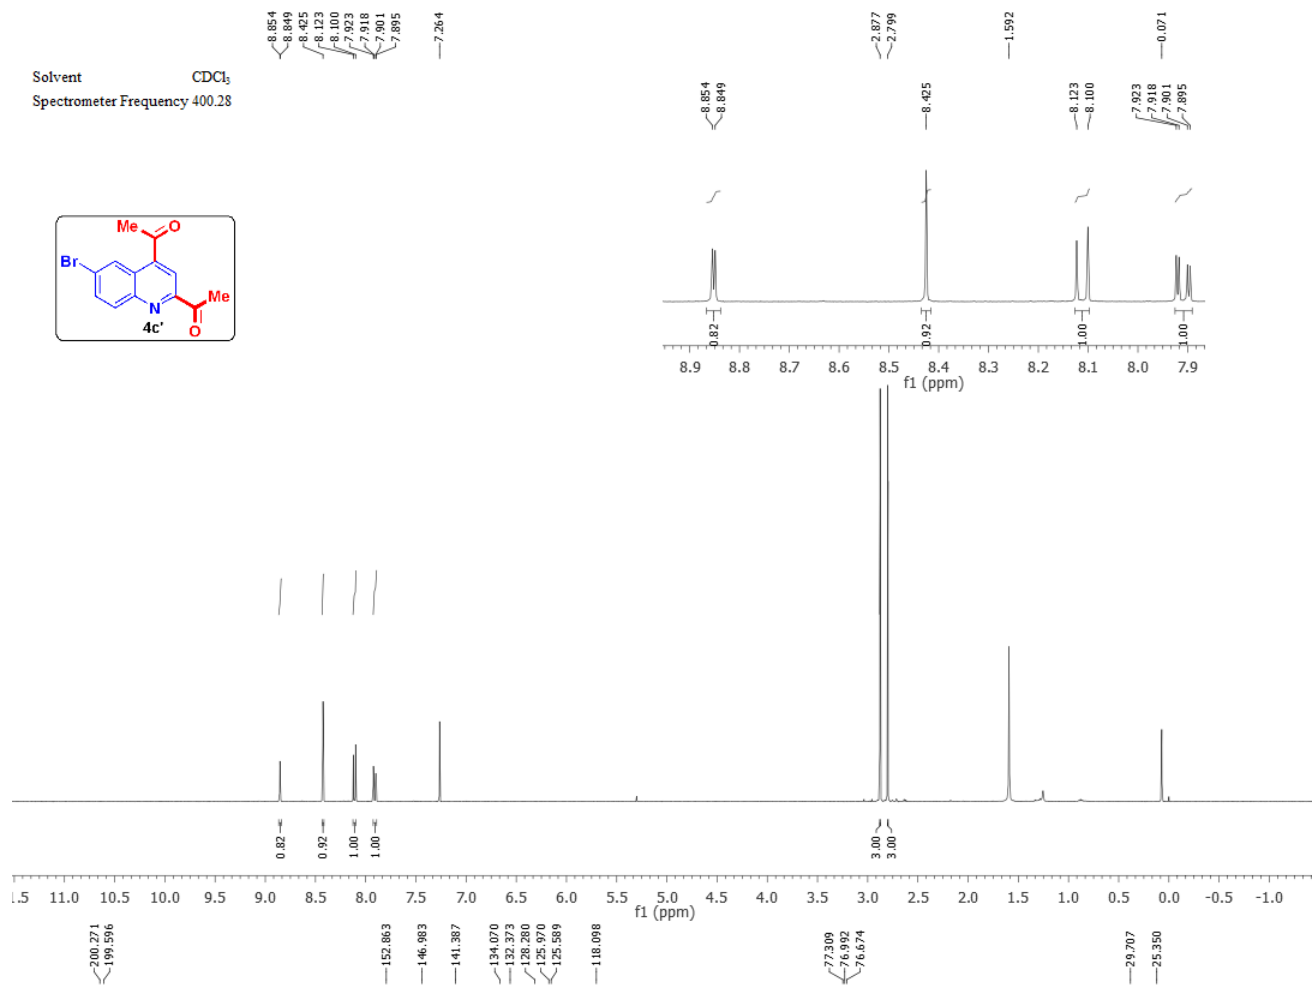

Solvent  $\text{CDCl}_3$   
Spectrometer Frequency 100.66

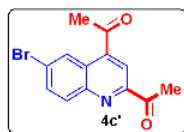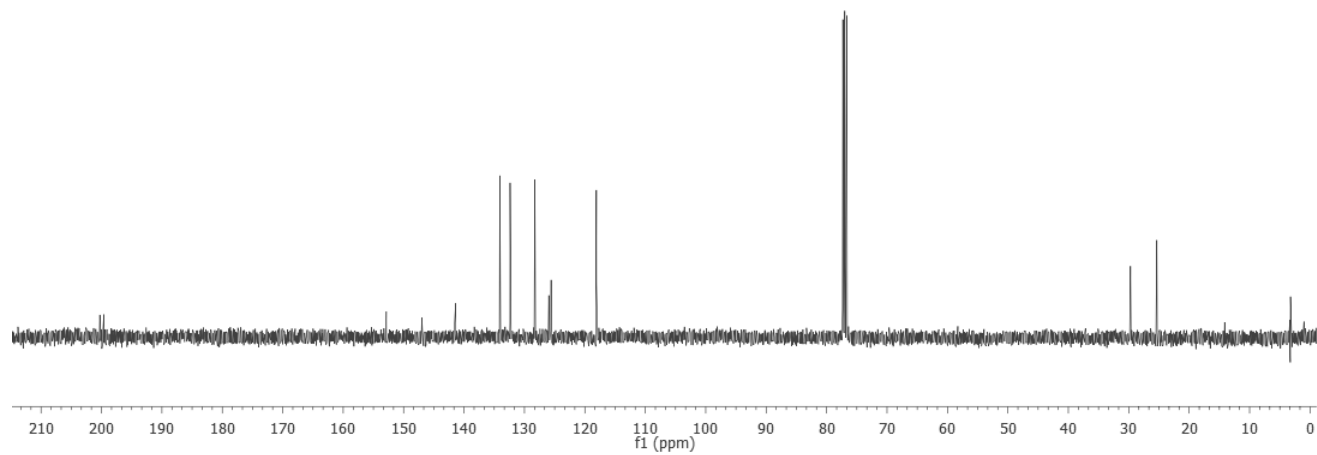

Supplement: d0gc01183e1.pdf [file d0gc01183e1.pdf]
